# Supplementary material for: Drug-Gene Network Signature Modeling Predicts Breast Cancer Patient Response to Neoadjuvant Chemotherapy
Source: Research Square preprint supplement (doi:10.21203/rs.3.rs-6130021/v1), 2025-03-18
Supplement: Supplementary file 1 [file 4f084ac77900cd3982d96a75.docx]

| **Dataset** | **pCR** | **RD** | **Total** | **Grp** |
| --- | --- | --- | --- | --- |
| **D1-NS** | 59 | 31 | 90 | **R1** |
| **D4-NS** | 22 | 143 | 165 |
| **D3V-NS** | 13 | 73 | 86 |
| **D4-NS D1-NS** | 81 | 174 | 255 |
| **D3V-NS D1-NS** | 72 | 104 | 176 |
| **D3V-NS D4-NS** | 35 | 216 | 251 |
| **D3V-NS D4-NS D1-NS** | 94 | 247 | 341 |
| **D1-NS** | 37 | 12 | 49 | **R2** |
| **D4-NS** | 19 | 86 | 105 |
| **D3V-NS** | 13 | 69 | 82 |
| **D4-NS D1-NS** | 56 | 98 | 154 |
| **D3V-NS D1-NS** | 50 | 81 | 131 |
| **D3V-NS D4-NS** | 32 | 155 | 187 |
| **D3V-NS D4-NS D1-NS** | 69 | 167 | 236 |
| **D1-NS** | 37 | 12 | 49 | **R3** |
| **D4-NS** | 8 | 52 | 60 |
| **D3V-NS** | 11 | 35 | 46 |
| **D4-NS D1-NS** | 45 | 64 | 109 |
| **D3V-NS D1-NS** | 48 | 47 | 95 |
| **D3V-NS D4-NS** | 19 | 87 | 106 |
| **D3V-NS D4-NS D1-NS** | 56 | 99 | 155 |
| **D1-NS** | 59 | 31 | 90 | **R4** |
| **D4-NS** | 11 | 64 | 75 |
| **D3V-NS** | 9 | 50 | 59 |
| **D4-NS D1-NS** | 70 | 95 | 165 |
| **D3V-NS D1-NS** | 68 | 81 | 149 |
| **D3V-NS D4-NS** | 20 | 114 | 134 |
| **D3V-NS D4-NS D1-NS** | 79 | 145 | 224 |
| **D1-NS** | 37 | 12 | 49 | **R5** |
| **D4-NS** | 1 | 9 | 10 |
| **D3V-NS** | 7 | 25 | 32 |
| **D4-NS D1-NS** | 38 | 21 | 59 |
| **D3V-NS D1-NS** | 44 | 37 | 81 |
| **D3V-NS D4-NS** | 8 | 34 | 42 |
| **D3V-NS D4-NS D1-NS** | 45 | 46 | 91 |

**Supplementary Table 1:** Distribution of pCR and RD patients across various datasets with stratification groups (Grp) described in Figure 2. The table specifies the counts of individuals that responded to NAC treatment with pCR or RD, with the Total column being the aggregate of all patients.

| **Dataset** | **ACC** | **AUROC** | **STDEV** | **PPV** | **NPV** | **SPE** | **SEN** | **F1** | **Grp** |
| --- | --- | --- | --- | --- | --- | --- | --- | --- | --- |
| **D1-NS** | 67.8 | 54.3 | 11.6 | 69.3 | 69.8 | 22.7 | 91.7 | 78.7 | **R1** |
| **D4-NS** | 83.6 | 49.0 | 5.9 | 0.0 | 86.2 | 96.5 | 0.0 | 0.0 |
| **D3V-NS** | 80.3 | 65.1 | 12.5 | 25.0 | 87.0 | 90.4 | 23.3 | 24.1 |
| **D4-NS D1-NS** | 79.2 | 77.8 | 1.5 | 66.4 | 86.4 | 82.8 | 71.6 | 68.6 |
| **D3V-NS D1-NS** | 72.7 | 79.9 | 3.2 | 63.8 | 82.0 | 69.2 | 77.8 | 70.0 |
| **D3V-NS D4-NS** | 80.1 | 48.9 | 6.0 | 4.2 | 85.5 | 92.6 | 3.0 | 3.5 |
| **D3V-NS D4-NS D1-NS** | 80.4 | 72.6 | 9.0 | 65.5 | 85.5 | 87.8 | 60.8 | 63.0 |
| **D1-NS** | 75.5 | 66.8 | 14.0 | 76.6 | 33.3 | 8.3 | 97.2 | 85.7 | **R2** |
| **D4-NS** | 74.3 | 44.5 | 6.5 | 5.6 | 81.1 | 89.6 | 5.6 | 5.6 |
| **D3V-NS** | 78.0 | 62.9 | 9.6 | 22.2 | 85.0 | 89.9 | 15.0 | 16.2 |
| **D4-NS D1-NS** | 76.0 | 74.0 | 3.6 | 71.4 | 79.6 | 84.8 | 60.9 | 64.0 |
| **D3V-NS D1-NS** | 76.4 | 82.1 | 8.9 | 70.0 | 81.0 | 84.0 | 64.6 | 65.5 |
| **D3V-NS D4-NS** | 79.1 | 56.1 | 7.4 | 15.9 | 83.0 | 94.2 | 6.4 | 8.7 |
| **D3V-NS D4-NS D1-NS** | 77.5 | 72.4 | 1.2 | 65.7 | 81.7 | 88.0 | 52.2 | 57.8 |
| **D1-NS** | 75.5 | 66.8 | 14.0 | 76.6 | 33.3 | 8.3 | 97.2 | 85.7 | **R3** |
| **D4-NS** | 80.0 | 48.5 | 12.5 | 0.0 | 85.4 | 92.2 | 0.0 | 0.0 |
| **D3V-NS** | 76.1 | 71.1 | 14.5 | 50.0 | 80.0 | 91.4 | 27.8 | 35.6 |
| **D4-NS D1-NS** | 79.9 | 79.5 | 10.5 | 77.5 | 84.7 | 83.0 | 75.6 | 74.6 |
| **D3V-NS D1-NS** | 74.8 | 82.5 | 5.3 | 74.2 | 80.0 | 72.1 | 77.1 | 74.5 |
| **D3V-NS D4-NS** | 80.2 | 57.8 | 8.2 | 40.0 | 83.0 | 95.4 | 10.3 | 14.4 |
| **D3V-NS D4-NS D1-NS** | 78.1 | 78.1 | 3.2 | 74.2 | 80.8 | 86.9 | 62.7 | 66.8 |
| **D1-NS** | 67.8 | 54.3 | 11.6 | 69.3 | 69.8 | 22.7 | 91.7 | 78.7 | **R4** |
| **D4-NS** | 84.0 | 54.4 | 5.0 | 16.7 | 86.2 | 96.9 | 8.3 | 11.1 |
| **D3V-NS** | 79.7 | 63.4 | 8.1 | 0.0 | 83.9 | 94.1 | 0.0 | 0.0 |
| **D4-NS D1-NS** | 73.9 | 77.1 | 1.8 | 67.9 | 81.6 | 71.7 | 77.3 | 71.6 |
| **D3V-NS D1-NS** | 67.8 | 76.2 | 4.1 | 63.2 | 73.2 | 64.2 | 72.1 | 67.2 |
| **D3V-NS D4-NS** | 84.3 | 59.0 | 3.3 | 0.0 | 85.0 | 99.1 | 0.0 | 0.0 |
| **D3V-NS D4-NS D1-NS** | 76.4 | 78.8 | 2.3 | 65.3 | 83.4 | 79.3 | 71.0 | 67.9 |
| **D1-NS** | 75.5 | 66.8 | 14.0 | 76.6 | 33.3 | 8.3 | 97.2 | 85.7 | **R5** |
| **D4-NS** | N/A | N/A | N/A | N/A | N/A | N/A | N/A | N/A |
| **D3V-NS** | 74.8 | 64.8 | 9.8 | 0.0 | 77.4 | 95.8 | 0.0 | 0.0 |
| **D4-NS D1-NS** | 69.7 | 71.4 | 10.9 | 75.4 | 59.3 | 52.4 | 79.3 | 76.8 |
| **D3V-NS D1-NS** | 69.1 | 78.2 | 5.0 | 69.2 | 73.5 | 59.6 | 77.8 | 72.6 |
| **D3V-NS D4-NS** | 71.4 | 64.1 | 14.4 | 0.0 | 78.8 | 88.1 | 0.0 | 0.0 |
| **D3V-NS D4-NS D1-NS** | 74.7 | 82.4 | 3.3 | 73.7 | 79.0 | 73.8 | 75.6 | 73.8 |

**Supplementary Table 3:** Performance metrics for datasets under the stratification strategies (Grp) outlined in Figure 2. The table presents key metrics, including Accuracy (ACC), Area Under the Receiver Operating Characteristic Curve (AUROC), Positive Predictive Value (PPV), Negative Predictive Value (NPV), Specificity (SPE), Sensitivity (SEN), and F1 Score (F1), reported as percentages.

| **Grp** | **ACC** | **AUROC** | **STDEV** | **PPV** | **NPV** | **SPE** | **SEN** | **F1** | **pCR** | **RD** | **Total** |
| --- | --- | --- | --- | --- | --- | --- | --- | --- | --- | --- | --- |
| **R5** | 74.7 | 82.4 | 3.3 | 73.7 | 79.0 | 73.8 | 75.6 | 73.8 | 45 | 46 | 91 |
| **R5** **(ER-)** | 60.3 | 66.9 | 15.6 | 62.2 | 58.3 | 46.8 | 70.8 | 66.1 | 24 | 19 | 43 |
| **R5** **(ER+)** | 87.5 | 88.9 | 4.7 | 82.7 | 92.1 | 85.2 | 90.5 | 86.3 | 21 | 27 | 48 |
| **R5** **(HER2-)** | 75.9 | 78.3 | 4.1 | 74.0 | 81.8 | 72.2 | 80.8 | 76.1 | 41 | 46 | 87 |
| **R5** **(HER2+)** | N/A | N/A | N/A | N/A | N/A | N/A | N/A | N/A | 2 | 0 | 2 |
| **R5** **(PR-)** | 67.5 | 74.8 | 11.1 | 69.8 | 71.8 | 64.8 | 70.4 | 67.6 | 27 | 25 | 52 |
| **R5** **(PR+)** | 94.9 | 93.7 | 4.5 | 95.2 | 95.8 | 95.2 | 94.4 | 94.4 | 18 | 21 | 39 |
| **R5** **(HR-)** | 56.4 | 62.1 | 7.0 | 60.0 | 50.0 | 41.1 | 67.3 | 62.2 | 22 | 17 | 39 |
| **R5** **(HR+)** | 90.4 | 87.5 | 2.7 | 87.5 | 93.0 | 89.6 | 91.7 | 89.4 | 23 | 29 | 52 |
| **R5** **(NonTN)** | 84.5 | 86.4 | 6.0 | 85.0 | 84.6 | 89.6 | 77.4 | 80.6 | 23 | 29 | 52 |
| **R5** **(TN)** | 59.4 | 66.0 | 16.3 | 63.3 | 57.1 | 52.2 | 65.1 | 63.2 | 20 | 17 | 37 |

**Supplementary Table 4:** Performance metrics for the D3V-NS D4-NS D1-NS dataset after applying R5 stratification and further stratification into various histological subgroups, as illustrated in Figure 8A. The table presents the same detailed performance metrics (reported as percentages) as Supplementary Table 3, including ACC, AUROC, PPV, NPV, SPE, SEN, and F1, across different datasets and stratification groups (Grp).

| **Key** | **BioNAV™ NS** | **RNAec** | **Ipredictor** | **ICpredictor** |
| --- | --- | --- | --- | --- |

| **Stratification** | **ACC** | **AUROC** | **PPV** | **NPV** | **SPE** | **SEN** |
| --- | --- | --- | --- | --- | --- | --- |
| **D2**  **(ER+ & HER2-)** **2-layer** | **86.4** | **87.2** | **69.4** | **89.9** | **93.6** | **55.6** |
| **85.5** | **N/A** | **58.8** | **94.2** | **76.9** | **87.5** |
| **N/A** | **80.0** | **N/A** | **N/A** | **N/A** | **N/A** |
| **N/A** | **84.0** | **N/A** | **N/A** | **N/A** | **N/A** |
| **D2**  **(ER+)** **1-layer** | **74.7** | **73.8** | **57.8** | **79.6** | **89.4** | **28.6** |
| **N/A** | **N/A** | **N/A** | **N/A** | **N/A** | **N/A** |
| **N/A** | **69.8** | **N/A** | **N/A** | **N/A** | **N/A** |
| **N/A** | **79.4** | **N/A** | **N/A** | **N/A** | **N/A** |
| **D2** | **59.3** | **59.3** | **40.4** | **69.1** | **69.0** | **40.8** |
| **85.6** | **N/A** | **77.9** | **90.4** | **86.6** | **83.8** |
| **70.2** | **74.9** | **58.0** | **78.4** | **73.9** | **63.7** |
| **72.1** | **80.1** | **58.3** | **85.1** | **68.3** | **78.7** |

**Supplementary Table 5:** Comparison of the prediction metrics for predicting patient response to NAC produced by BioNAV™ NS + Clinical (light blue), RNAec (purple), Ipredictor (teal), and ICpredictor (blue-green) methodologies.
