# Supplementary material for: Drug-Gene Network Signature Modeling Predicts Breast Cancer Patient Response to Neoadjuvant Chemotherapy
Source: Research Square preprint supplement (doi:10.21203/rs.3.rs-6130021/v1), 2025-03-18
Supplement: Supplementary file 2 [file d198d39b7a0cef1fa96839a6.xlsx]

## Sheet: gene input
The 4 lists used as an input are provided in this sheet. g:Profiler allows gene to be separated by a space only.
The query was "run a multiquery" in g:Profiler and the option to show "All results" was selected. Nothing else was changed from the default. Please refer to g:Profiler publication (Kolberg et el., 023) and website for understanding how the data is generated.
gProfiler_hsapiens_12-17-2024_5-39-43 PM__multiquery
>pCR NS
ABHD4 ABL1 ACSL1 ADGRA3 AKR7A2 ALDH2 ARHGEF2 ARPC1A ATG3 ATP2C1 B4GAT1 BLVRA C14orf1 C2CD2 CCP110 CEP57 CHN1 CLPP CLSTN1 CLTB CNN2 CNOT8 CTPS1 DUSP1 EFCAB14 EGR1 EIF4A3 ENOPH1 ENTPD6 EPN2 ESRRA FAIM FBRS GPER1 HAT1 HCFC1 HDAC2 HSPBP1 ICAM1 IDH3A IGBP1 KARS KCNK1 KIF2C LBR LGALS8 LIG1 LIPA ME2 MMP1 NCK2 NDST1 NFYC NOLC1 PCNA PGRMC2 PLOD3 PLPP1 PLS3 PLS3 POP4 PPP2R5D PRDX4 PRKAG1 PRKCD PRKX PSMA5 R…
>pCR DGE
MEFV LPAL2 NDUFB2-AS1 HKDC1 NLGN3 CACNA1F IL9R ATP2B2 ENTPD1-AS1 CHST5 SCN5A SLC16A8 DLEC1 CATSPERG FGF5 HAPLN2 GUCY2D SYT2 AKAP6 TRPC4 MUC3B TG RHD NOX5 PCDHGA8 SLC7A9 ADRA2B ACSBG1 CNNM1 KCNK7 TCP10L CAMK2A CDX1 DNAH6 ASGR2 MLANA DNAH2 GABRB2 NOS2 LTK MOBP APC2 UPB1 NMUR1 B3GAT1 ANKRD53 GRIN2C GNRHR XPNPEP2 HNF1A ALOXE3 CHRNA10 TSHR AFF2 WNT10B ZBTB20 SLC13A4 CUBN TCAP ZBTB20 IL5RA STEAP1B TERT…
>RD DGE
KIR3DL2 MEIS2 CHRNA2 SCN10A NFIB GASK1B AQP2 RBPJL SLC22A8 SRPX CDH16 SLC5A5 PCYOX1 MFSD6 PRNP MYBPC2 PAX1 ITM2A ASB4 ADARB2 HIPK3 PALM2AKAP2 RB1 OCA2 MAGEA10 ATP2B3 EGR4 SEPTIN10 CXCL12 INHBC CLCN1 SLC5A2 BLK PTGER4 CAV2 TREML2 PRAME WNT8B HAL AMN HMX1 PADI1 MATN2 EPHA5 PRKCG LUM MATN1 CPE KCNA5 INA H2AJ TLX2 ADAM20 LAMB1 P2RX5 SLC18A3 CYP2W1 PDZRN3 CDH17 GNAT1 ZBTB20 TRIM15 NID1 TSHR YES1 GLT8D…
>RD NS
TEAD4 PAPSS2 RAD51B GOLGA8H TSNAXIP1 SV2B PPP1R3A PYGB FEZ2 MMP14 SLAMF7 PDE6G CASKIN2 EIF3J CYP3A4 EYA3 CCL23 PELI2 DDX39A IDI1 TCERG1 CAND1 EDA2R MAPRE3 H6PD ADAMTS3 HTRA2 NXPE3 SPINK2 MAP3K4 MTHFSD XRCC3 SLC30A3 AGR2 BLK PDE9A IFT27 C1orf106 PIK3R5 PPWD1 LAMC1 FAM171A1 ADAMTS12 SCN5A SIGLEC7 ZNF280B MATN1 GGT1 COL3A1 MAL NAE1 KLHL28 CDKL2 HMGB3 PRSS53 POTEKP TBC1D13 PTGER2 MORF4L1 SIRT6 SCN5A …

## Sheet: gProfiler_hsapiens_results
source	term_name	term_id	term_size	effective_domain_size	p_adj_color	adjusted_p_value__pCR-NS-hi-100	query_size__pCR-NS-hi-100	intersection_size__pCR-NS-hi-100	p_adj_color	adjusted_p_value__pCR-DGE-100	query_size__pCR-DGE-100	intersection_size__pCR-DGE-100	p_adj_color	adjusted_p_value__RD-DGE-100	query_size__RD-DGE-100	intersection_size__RD-DGE-100	p_adj_color	adjusted_p_value__RD-NS-hi-100	query_size__RD-NS-hi-100	intersection_size__RD-NS-hi-100
GO:MF	protein-containing complex binding	GO:0044877	1752	20212	0.00296518	0.00296518	95	23	1	1	93	5	1	1	97	10	1	1	95	11
GO:MF	catalytic activity	GO:0003824	5758	20212	0.0456201	0.0456201	95	45	1	1	93	22	1	1	97	31	1	1	95	36
GO:MF	protein binding	GO:0005515	14838	20212	0.0622792	0.0622792	95	85	1	1	93	73	1	1	97	79	0.493108	0.493108	95	83
GO:MF	chromatin binding	GO:0003682	602	20212	0.0776113	0.0776113	95	11	1	1	93	1	1	1	97	1	1	1	95	3
GO:MF	histone acetyltransferase binding	GO:0035035	24	20212	0.121485	0.121485	95	3	1	1	-1	-1	1	1	-1	-1	1	1	-1	-1
GO:MF	adenyl nucleotide binding	GO:0030554	1661	20212	0.147165	0.147165	95	19	1	1	93	11	1	1	97	15	1	1	95	16
GO:MF	nuclear steroid receptor activity	GO:0003707	26	20212	0.154999	0.154999	95	3	1	1	-1	-1	1	1	97	1	1	1	-1	-1
GO:MF	enzyme binding	GO:0019899	2103	20212	0.155555	0.155555	95	22	1	1	93	4	1	1	97	13	1	1	95	12
GO:MF	promoter-specific chromatin binding	GO:1990841	65	20212	0.159594	0.159594	95	4	1	1	-1	-1	1	1	-1	-1	1	1	-1	-1
GO:MF	cAMP-dependent protein kinase activity	GO:0004691	6	20212	0.207628	0.207628	95	2	1	1	-1	-1	1	1	-1	-1	1	1	-1	-1
GO:MF	heterocyclic compound binding	GO:1901363	2325	20212	0.245709	0.245709	95	23	1	1	93	15	1	1	97	20	1	1	95	19
GO:MF	cyclic nucleotide-dependent protein kinase activity	GO:0004690	8	20212	0.385202	0.385202	95	2	1	1	-1	-1	1	1	-1	-1	1	1	-1	-1
GO:MF	hydrolase activity	GO:0016787	2478	20212	0.602698	0.602698	95	23	1	1	93	6	1	1	97	8	1	1	95	18
GO:MF	purine nucleotide binding	GO:0017076	2021	20212	0.63875	0.63875	95	20	1	1	93	11	1	1	97	17	1	1	95	18
GO:MF	nucleotide binding	GO:0000166	2187	20212	0.687343	0.687343	95	21	1	1	93	12	1	1	97	18	1	1	95	18
GO:MF	nucleoside phosphate binding	GO:1901265	2188	20212	0.691375	0.691375	95	21	1	1	93	12	1	1	97	18	1	1	95	18
GO:MF	binding	GO:0005488	18370	20212	0.756807	0.756807	95	94	1	1	93	86	1	1	97	92	1	1	95	93
GO:MF	histone binding	GO:0042393	251	20212	0.765757	0.765757	95	6	1	1	-1	-1	1	1	-1	-1	1	1	95	2
GO:MF	molecular sequestering activity	GO:0140313	45	20212	0.79303	0.79303	95	3	1	1	-1	-1	1	1	97	2	1	1	-1	-1
GO:MF	RNA polymerase II-specific DNA-binding transcription factor binding	GO:0061629	349	20212	0.831795	0.831795	95	7	1	1	93	1	1	1	97	5	1	1	95	2
GO:MF	calcium ion transmembrane transporter activity	GO:0015085	145	20212	1	1	95	1	7.21274e-11	7.21274e-11	93	13	1	1	97	2	1	1	95	1
GO:MF	calcium channel activity	GO:0005262	127	20212	1	1	-1	-1	3.55395e-10	3.55395e-10	93	12	1	1	97	1	1	1	95	1
GO:MF	channel activity	GO:0015267	507	20212	1	1	95	1	8.43513e-10	8.43513e-10	93	19	1	1	97	8	1	1	95	2
GO:MF	passive transmembrane transporter activity	GO:0022803	508	20212	1	1	95	1	8.7318e-10	8.7318e-10	93	19	1	1	97	8	1	1	95	2
GO:MF	monoatomic ion channel activity	GO:0005216	444	20212	1	1	95	1	1.04566e-08	1.04566e-08	93	17	1	1	97	7	1	1	95	1
GO:MF	monoatomic cation channel activity	GO:0005261	336	20212	1	1	95	1	2.13575e-08	2.13575e-08	93	15	1	1	97	5	1	1	95	1
GO:MF	inorganic molecular entity transmembrane transporter activity	GO:0015318	692	20212	1	1	95	2	2.23915e-08	2.23915e-08	93	20	0.0187557	0.0187557	97	13	1	1	95	3
GO:MF	inorganic cation transmembrane transporter activity	GO:0022890	569	20212	1	1	95	2	5.70387e-08	5.70387e-08	93	18	1	1	97	9	1	1	95	3
GO:MF	transmembrane transporter activity	GO:0022857	1127	20212	1	1	95	4	1.01278e-07	1.01278e-07	93	24	0.0169062	0.0169062	97	17	1	1	95	7
GO:MF	metal ion transmembrane transporter activity	GO:0046873	445	20212	1	1	95	2	1.10601e-07	1.10601e-07	93	16	0.968504	0.968504	97	8	1	1	95	3
GO:MF	monoatomic ion transmembrane transporter activity	GO:0015075	727	20212	1	1	95	2	4.02305e-07	4.02305e-07	93	19	0.0312158	0.0312158	97	13	1	1	95	3
GO:MF	transporter activity	GO:0005215	1239	20212	1	1	95	4	6.83794e-07	6.83794e-07	93	24	0.0553499	0.0553499	97	17	1	1	95	7
GO:MF	gated channel activity	GO:0022836	315	20212	1	1	95	1	1.24862e-06	1.24862e-06	93	13	1	1	97	6	1	1	95	1
GO:MF	monoatomic cation transmembrane transporter activity	GO:0008324	608	20212	1	1	95	2	1.31455e-06	1.31455e-06	93	17	0.113845	0.113845	97	11	1	1	95	3
GO:MF	neurotransmitter receptor activity	GO:0030594	100	20212	1	1	-1	-1	1.1449e-05	1.1449e-05	93	8	1	1	97	1	1	1	-1	-1
GO:MF	extracellular matrix structural constituent	GO:0005201	167	20212	1	1	-1	-1	1	1	93	1	7.92192e-05	7.92192e-05	97	9	1	1	95	3
GO:MF	voltage-gated monoatomic ion channel activity	GO:0005244	183	20212	1	1	95	1	9.88039e-05	9.88039e-05	93	9	1	1	97	4	1	1	95	1
GO:MF	voltage-gated channel activity	GO:0022832	186	20212	1	1	95	1	0.000113466	0.000113466	93	9	1	1	97	4	1	1	95	1
GO:MF	protein tyrosine kinase activity	GO:0004713	148	20212	1	1	95	2	1	1	93	1	0.000407005	0.000407005	97	8	1	1	95	1
GO:MF	postsynaptic neurotransmitter receptor activity	GO:0098960	72	20212	1	1	-1	-1	0.000580198	0.000580198	93	6	1	1	97	1	1	1	-1	-1
GO:MF	signaling receptor activity	GO:0038023	1491	20212	1	1	95	6	0.00183881	0.00183881	93	21	1	1	97	13	1	1	95	10
GO:MF	molecular transducer activity	GO:0060089	1491	20212	1	1	95	6	0.00183881	0.00183881	93	21	1	1	97	13	1	1	95	10
GO:MF	high voltage-gated calcium channel activity	GO:0008331	24	20212	1	1	-1	-1	0.00244648	0.00244648	93	4	1	1	97	1	1	1	95	1
GO:MF	voltage-gated calcium channel activity	GO:0005245	53	20212	1	1	-1	-1	0.00262314	0.00262314	93	5	1	1	97	1	1	1	95	1
GO:MF	transmitter-gated monoatomic ion channel activity involved in regulation of postsynaptic membrane potential	GO:1904315	55	20212	1	1	-1	-1	0.00315692	0.00315692	93	5	1	1	97	1	1	1	-1	-1
GO:MF	neurotransmitter receptor activity involved in regulation of postsynaptic membrane potential	GO:0099529	57	20212	1	1	-1	-1	0.00377229	0.00377229	93	5	1	1	97	1	1	1	-1	-1
GO:MF	glutamate receptor activity	GO:0008066	27	20212	1	1	-1	-1	0.00399816	0.00399816	93	4	1	1	-1	-1	1	1	-1	-1
GO:MF	voltage-gated monoatomic cation channel activity	GO:0022843	156	20212	1	1	95	1	0.00455724	0.00455724	93	7	1	1	97	3	1	1	95	1
GO:MF	transmitter-gated channel activity	GO:0022835	61	20212	1	1	-1	-1	0.00528264	0.00528264	93	5	1	1	97	1	1	1	-1	-1
GO:MF	transmitter-gated monoatomic ion channel activity	GO:0022824	61	20212	1	1	-1	-1	0.00528264	0.00528264	93	5	1	1	97	1	1	1	-1	-1
GO:MF	transmembrane receptor protein tyrosine kinase activity	GO:0004714	63	20212	1	1	-1	-1	1	1	93	1	0.00924141	0.00924141	97	5	1	1	-1	-1
GO:MF	transmembrane signaling receptor activity	GO:0004888	1269	20212	1	1	95	3	0.00967158	0.00967158	93	18	1	1	97	10	1	1	95	8
GO:MF	extracellular ligand-gated monoatomic ion channel activity	GO:0005230	74	20212	1	1	-1	-1	0.0136463	0.0136463	93	5	1	1	97	2	1	1	-1	-1
GO:MF	transmembrane receptor protein kinase activity	GO:0019199	82	20212	1	1	-1	-1	1	1	93	1	0.033386	0.033386	97	5	1	1	-1	-1
GO:MF	peptide YY receptor activity	GO:0001601	3	20212	1	1	-1	-1	1	1	-1	-1	1	1	-1	-1	0.0419099	0.0419099	95	2
GO:MF	four-way junction DNA binding	GO:0000400	18	20212	1	1	95	1	1	1	-1	-1	1	1	-1	-1	0.0499903	0.0499903	95	3
GO:MF	calcium ion binding	GO:0005509	726	20212	1	1	95	5	0.0718721	0.0718721	93	12	1	1	97	9	1	1	95	2
GO:MF	ligand-gated monoatomic ion channel activity	GO:0015276	171	20212	1	1	95	1	0.0819688	0.0819688	93	6	1	1	97	2	1	1	-1	-1
GO:MF	ligand-gated channel activity	GO:0022834	172	20212	1	1	95	1	0.0846201	0.0846201	93	6	1	1	97	2	1	1	-1	-1
GO:MF	DNA damage sensor activity	GO:0140612	22	20212	1	1	-1	-1	1	1	-1	-1	1	1	-1	-1	0.0930666	0.0930666	95	3
GO:MF	glutamate-gated calcium ion channel activity	GO:0022849	5	20212	1	1	-1	-1	0.122098	0.122098	93	2	1	1	-1	-1	1	1	-1	-1
GO:MF	FATZ binding	GO:0051373	5	20212	1	1	-1	-1	0.122098	0.122098	93	2	1	1	-1	-1	1	1	-1	-1
GO:MF	transmembrane transporter binding	GO:0044325	140	20212	1	1	-1	-1	0.278323	0.278323	93	5	1	1	97	3	1	1	95	1
GO:MF	DNA-binding transcription activator activity, RNA polymerase II-specific	GO:0001228	473	20212	1	1	95	4	1	1	93	3	0.322232	0.322232	97	9	1	1	95	1
GO:MF	NMDA glutamate receptor activity	GO:0004972	8	20212	1	1	-1	-1	0.33881	0.33881	93	2	1	1	-1	-1	1	1	-1	-1
GO:MF	DNA-binding transcription activator activity	GO:0001216	479	20212	1	1	95	4	1	1	93	3	0.352886	0.352886	97	9	1	1	95	1
GO:MF	protein kinase activity	GO:0004672	586	20212	1	1	95	5	1	1	93	3	0.363313	0.363313	97	10	1	1	95	4
GO:MF	adenylate cyclase inhibiting G protein-coupled glutamate receptor activity	GO:0001640	9	20212	1	1	-1	-1	0.434307	0.434307	93	2	1	1	-1	-1	1	1	-1	-1
GO:MF	G protein-coupled glutamate receptor activity	GO:0098988	9	20212	1	1	-1	-1	0.434307	0.434307	93	2	1	1	-1	-1	1	1	-1	-1
GO:MF	G protein-coupled amine receptor activity	GO:0008227	39	20212	1	1	-1	-1	0.449636	0.449636	93	3	1	1	-1	-1	1	1	-1	-1
GO:MF	peptide binding	GO:0042277	327	20212	1	1	95	2	0.461518	0.461518	93	7	1	1	97	2	1	1	95	2
GO:MF	inorganic anion transmembrane transporter activity	GO:0015103	150	20212	1	1	-1	-1	1	1	93	3	0.560149	0.560149	97	5	1	1	95	1
GO:MF	DNA secondary structure binding	GO:0000217	40	20212	1	1	95	1	1	1	-1	-1	1	1	-1	-1	0.56161	0.56161	95	3
GO:MF	small molecule sensor activity	GO:0140299	41	20212	1	1	-1	-1	1	1	-1	-1	1	1	-1	-1	0.603893	0.603893	95	3
GO:MF	neuropeptide Y receptor activity	GO:0004983	10	20212	1	1	-1	-1	1	1	-1	-1	1	1	-1	-1	0.615291	0.615291	95	2
GO:MF	serotonin binding	GO:0051378	11	20212	1	1	-1	-1	0.659558	0.659558	93	2	1	1	-1	-1	1	1	-1	-1
GO:MF	sodium ion transmembrane transporter activity	GO:0015081	158	20212	1	1	95	1	1	1	93	3	0.707241	0.707241	97	5	1	1	95	1
GO:MF	glutamate receptor binding	GO:0035254	46	20212	1	1	-1	-1	0.729688	0.729688	93	3	1	1	97	1	1	1	-1	-1
GO:MF	active monoatomic ion transmembrane transporter activity	GO:0022853	246	20212	1	1	95	1	1	1	93	2	0.85757	0.85757	97	6	1	1	95	1
GO:MF	SNARE binding	GO:0000149	105	20212	1	1	95	2	1	1	93	1	1	1	-1	-1	1	1	-1	-1
GO:MF	structural constituent of cytoskeleton	GO:0005200	113	20212	1	1	-1	-1	1	1	-1	-1	1	1	97	2	1	1	-1	-1
GO:MF	excitatory extracellular ligand-gated monoatomic ion channel activity	GO:0005231	37	20212	1	1	-1	-1	1	1	93	1	1	1	97	2	1	1	-1	-1
GO:MF	voltage-gated chloride channel activity	GO:0005247	11	20212	1	1	-1	-1	1	1	-1	-1	1	1	97	1	1	1	-1	-1
GO:MF	voltage-gated sodium channel activity	GO:0005248	22	20212	1	1	-1	-1	1	1	93	1	1	1	97	1	1	1	95	1
GO:MF	voltage-gated potassium channel activity	GO:0005249	100	20212	1	1	95	1	1	1	93	2	1	1	97	2	1	1	-1	-1
GO:MF	delayed rectifier potassium channel activity	GO:0005251	28	20212	1	1	-1	-1	1	1	93	1	1	1	97	1	1	1	-1	-1
GO:MF	monoatomic anion channel activity	GO:0005253	93	20212	1	1	-1	-1	1	1	93	2	1	1	97	2	1	1	-1	-1
GO:MF	structural molecule activity	GO:0005198	1100	20212	1	1	95	2	1	1	93	4	1	1	97	13	1	1	95	8
GO:MF	chloride channel activity	GO:0005254	80	20212	1	1	-1	-1	1	1	93	2	1	1	97	2	1	1	-1	-1
GO:MF	potassium channel activity	GO:0005267	124	20212	1	1	95	1	1	1	93	3	1	1	97	2	1	1	-1	-1
GO:MF	sodium channel activity	GO:0005272	43	20212	1	1	95	1	1	1	93	2	1	1	97	1	1	1	95	1
GO:MF	acetylcholine transmembrane transporter activity	GO:0005277	4	20212	1	1	-1	-1	1	1	-1	-1	1	1	97	1	1	1	-1	-1
GO:MF	acetylcholine:proton antiporter activity	GO:0005278	1	20212	1	1	-1	-1	1	1	-1	-1	1	1	97	1	1	1	-1	-1
GO:MF	lipid transporter activity	GO:0005319	175	20212	1	1	-1	-1	1	1	-1	-1	1	1	97	1	1	1	95	1
GO:MF	neurotransmitter transmembrane transporter activity	GO:0005326	21	20212	1	1	-1	-1	1	1	-1	-1	1	1	97	1	1	1	-1	-1
GO:MF	glucose transmembrane transporter activity	GO:0005355	25	20212	1	1	-1	-1	1	1	-1	-1	1	1	97	1	1	1	-1	-1
GO:MF	low-affinity glucose:sodium symporter activity	GO:0005362	2	20212	1	1	-1	-1	1	1	-1	-1	1	1	97	1	1	1	-1	-1
GO:MF	water transmembrane transporter activity	GO:0005372	19	20212	1	1	-1	-1	1	1	-1	-1	1	1	97	1	1	1	-1	-1
GO:MF	P-type calcium transporter activity	GO:0005388	9	20212	1	1	95	1	1	1	93	1	1	1	97	1	1	1	-1	-1
GO:MF	hormone activity	GO:0005179	130	20212	1	1	-1	-1	1	1	93	1	1	1	97	1	1	1	-1	-1
GO:MF	integrin binding	GO:0005178	158	20212	1	1	95	2	1	1	93	1	1	1	97	2	1	1	95	2
GO:MF	platelet-derived growth factor receptor binding	GO:0005161	14	20212	1	1	-1	-1	1	1	-1	-1	1	1	97	1	1	1	-1	-1
GO:MF	serine-type endopeptidase inhibitor activity	GO:0004867	103	20212	1	1	95	1	1	1	-1	-1	1	1	97	1	1	1	95	1
GO:MF	nuclear receptor activity	GO:0004879	52	20212	1	1	95	2	1	1	-1	-1	1	1	97	1	1	1	-1	-1
GO:MF	G protein-coupled receptor activity	GO:0004930	838	20212	1	1	95	2	1	1	93	9	1	1	97	2	1	1	95	3
GO:MF	extracellularly ATP-gated monoatomic cation channel activity	GO:0004931	7	20212	1	1	-1	-1	1	1	-1	-1	1	1	97	1	1	1	-1	-1
GO:MF	icosanoid receptor activity	GO:0004953	15	20212	1	1	-1	-1	1	1	93	1	1	1	97	1	1	1	95	1
GO:MF	prostanoid receptor activity	GO:0004954	11	20212	1	1	-1	-1	1	1	93	1	1	1	97	1	1	1	95	1
GO:MF	prostaglandin receptor activity	GO:0004955	10	20212	1	1	-1	-1	1	1	93	1	1	1	97	1	1	1	95	1
GO:MF	prostaglandin E receptor activity	GO:0004957	5	20212	1	1	-1	-1	1	1	-1	-1	1	1	97	1	1	1	95	1
GO:MF	thyroid-stimulating hormone receptor activity	GO:0004996	2	20212	1	1	-1	-1	1	1	93	1	1	1	97	1	1	1	-1	-1
GO:MF	ephrin receptor activity	GO:0005003	18	20212	1	1	-1	-1	1	1	-1	-1	1	1	97	1	1	1	-1	-1
GO:MF	GPI-linked ephrin receptor activity	GO:0005004	6	20212	1	1	-1	-1	1	1	-1	-1	1	1	97	1	1	1	-1	-1
GO:MF	transmembrane-ephrin receptor activity	GO:0005005	14	20212	1	1	-1	-1	1	1	-1	-1	1	1	97	1	1	1	-1	-1
GO:MF	epidermal growth factor receptor activity	GO:0005006	3	20212	1	1	-1	-1	1	1	-1	-1	1	1	97	1	1	1	-1	-1
GO:MF	platelet-derived growth factor receptor activity	GO:0005017	3	20212	1	1	-1	-1	1	1	-1	-1	1	1	97	1	1	1	-1	-1
GO:MF	platelet-derived growth factor alpha-receptor activity	GO:0005018	1	20212	1	1	-1	-1	1	1	-1	-1	1	1	97	1	1	1	-1	-1
GO:MF	vascular endothelial growth factor receptor activity	GO:0005021	7	20212	1	1	-1	-1	1	1	-1	-1	1	1	97	1	1	1	-1	-1
GO:MF	neurotrophin receptor activity	GO:0005030	5	20212	1	1	-1	-1	1	1	-1	-1	1	1	97	1	1	1	-1	-1
GO:MF	GTPase activator activity	GO:0005096	271	20212	1	1	95	2	1	1	-1	-1	1	1	97	1	1	1	95	2
GO:MF	signaling receptor binding	GO:0005102	1501	20212	1	1	95	9	1	1	93	14	1	1	97	16	1	1	95	7
GO:MF	frizzled binding	GO:0005109	37	20212	1	1	-1	-1	1	1	93	1	1	1	97	2	1	1	-1	-1
GO:MF	cytokine activity	GO:0005125	238	20212	1	1	-1	-1	1	1	93	3	1	1	97	4	1	1	95	2
GO:MF	cytokine receptor binding	GO:0005126	278	20212	1	1	95	1	1	1	93	1	1	1	97	2	1	1	95	2
GO:MF	epidermal growth factor receptor binding	GO:0005154	35	20212	1	1	-1	-1	1	1	-1	-1	1	1	97	1	1	1	95	1
GO:MF	transforming growth factor beta receptor binding	GO:0005160	26	20212	1	1	95	1	1	1	-1	-1	1	1	97	1	1	1	-1	-1
GO:MF	P-type sodium:potassium-exchanging transporter activity	GO:0005391	7	20212	1	1	-1	-1	1	1	-1	-1	1	1	97	1	1	1	-1	-1
GO:MF	carbohydrate:monoatomic cation symporter activity	GO:0005402	16	20212	1	1	-1	-1	1	1	-1	-1	1	1	97	1	1	1	-1	-1
GO:MF	glucose:sodium symporter activity	GO:0005412	7	20212	1	1	-1	-1	1	1	-1	-1	1	1	97	1	1	1	-1	-1
GO:MF	proton-dependent oligopeptide secondary active transmembrane transporter activity	GO:0005427	2	20212	1	1	-1	-1	1	1	-1	-1	1	1	97	1	1	1	-1	-1
GO:MF	exopeptidase activity	GO:0008238	101	20212	1	1	-1	-1	1	1	93	1	1	1	97	1	1	1	95	1
GO:MF	tRNA-specific adenosine deaminase activity	GO:0008251	7	20212	1	1	-1	-1	1	1	-1	-1	1	1	97	1	1	1	-1	-1
GO:MF	zinc ion binding	GO:0008270	847	20212	1	1	95	9	1	1	93	2	1	1	97	7	1	1	95	5
GO:MF	lipid binding	GO:0008289	841	20212	1	1	95	6	1	1	93	2	1	1	97	2	1	1	95	4
GO:MF	structural constituent of muscle	GO:0008307	42	20212	1	1	-1	-1	1	1	93	1	1	1	97	1	1	1	95	1
GO:MF	voltage-gated monoatomic anion channel activity	GO:0008308	17	20212	1	1	-1	-1	1	1	-1	-1	1	1	97	1	1	1	-1	-1
GO:MF	retinoic acid 4-hydroxylase activity	GO:0008401	10	20212	1	1	-1	-1	1	1	-1	-1	1	1	97	1	1	1	95	1
GO:MF	monoamine transmembrane transporter activity	GO:0008504	12	20212	1	1	-1	-1	1	1	-1	-1	1	1	97	1	1	1	-1	-1
GO:MF	sodium:iodide symporter activity	GO:0008507	1	20212	1	1	-1	-1	1	1	-1	-1	1	1	97	1	1	1	-1	-1
GO:MF	monoatomic anion transmembrane transporter activity	GO:0008509	138	20212	1	1	-1	-1	1	1	93	2	1	1	97	4	1	1	95	1
GO:MF	sodium:potassium:chloride symporter activity	GO:0008511	3	20212	1	1	-1	-1	1	1	-1	-1	1	1	97	1	1	1	-1	-1
GO:MF	organic anion transmembrane transporter activity	GO:0008514	257	20212	1	1	95	1	1	1	93	4	1	1	97	1	1	1	-1	-1
GO:MF	G protein-coupled peptide receptor activity	GO:0008528	123	20212	1	1	-1	-1	1	1	93	2	1	1	97	1	1	1	95	2
GO:MF	P-type proton-exporting transporter activity	GO:0008553	3	20212	1	1	-1	-1	1	1	-1	-1	1	1	97	1	1	1	-1	-1
GO:MF	P-type sodium transporter activity	GO:0008554	7	20212	1	1	-1	-1	1	1	-1	-1	1	1	97	1	1	1	-1	-1
GO:MF	P-type potassium transmembrane transporter activity	GO:0008556	9	20212	1	1	-1	-1	1	1	-1	-1	1	1	97	1	1	1	-1	-1
GO:MF	P-type potassium:proton transporter activity	GO:0008900	3	20212	1	1	-1	-1	1	1	-1	-1	1	1	97	1	1	1	-1	-1
GO:MF	potassium:sodium symporter activity	GO:0009674	3	20212	1	1	-1	-1	1	1	-1	-1	1	1	97	1	1	1	-1	-1
GO:MF	calcium-dependent protein serine/threonine kinase activity	GO:0009931	9	20212	1	1	-1	-1	1	1	-1	-1	1	1	97	1	1	1	-1	-1
GO:MF	calcium-dependent protein kinase activity	GO:0010857	10	20212	1	1	-1	-1	1	1	-1	-1	1	1	97	1	1	1	-1	-1
GO:MF	proton transmembrane transporter activity	GO:0015078	144	20212	1	1	-1	-1	1	1	93	1	1	1	97	2	1	1	-1	-1
GO:MF	potassium ion transmembrane transporter activity	GO:0015079	161	20212	1	1	95	1	1	1	93	3	1	1	97	4	1	1	95	1
GO:MF	organic cation transmembrane transporter activity	GO:0015101	37	20212	1	1	-1	-1	1	1	-1	-1	1	1	97	1	1	1	-1	-1
GO:MF	metallopeptidase activity	GO:0008237	187	20212	1	1	95	1	1	1	93	2	1	1	97	2	1	1	95	3
GO:MF	endopeptidase inhibitor activity	GO:0004866	168	20212	1	1	95	1	1	1	93	1	1	1	97	2	1	1	95	1
GO:MF	metalloexopeptidase activity	GO:0008235	67	20212	1	1	-1	-1	1	1	93	1	1	1	97	1	1	1	95	1
GO:MF	heparin binding	GO:0008201	176	20212	1	1	-1	-1	1	1	-1	-1	1	1	97	1	1	1	95	2
GO:MF	solute:inorganic anion antiporter activity	GO:0005452	28	20212	1	1	-1	-1	1	1	-1	-1	1	1	97	1	1	1	-1	-1
GO:MF	steroid binding	GO:0005496	103	20212	1	1	95	3	1	1	-1	-1	1	1	97	1	1	1	95	1
GO:MF	androgen binding	GO:0005497	5	20212	1	1	-1	-1	1	1	-1	-1	1	1	97	1	1	1	-1	-1
GO:MF	retinoid binding	GO:0005501	38	20212	1	1	-1	-1	1	1	-1	-1	1	1	97	1	1	1	95	1
GO:MF	all-trans retinal binding	GO:0005503	5	20212	1	1	-1	-1	1	1	-1	-1	1	1	97	1	1	1	-1	-1
GO:MF	iron ion binding	GO:0005506	156	20212	1	1	95	1	1	1	93	1	1	1	97	1	1	1	95	2
GO:MF	copper ion binding	GO:0005507	61	20212	1	1	-1	-1	1	1	93	1	1	1	97	2	1	1	-1	-1
GO:MF	calmodulin binding	GO:0005516	206	20212	1	1	95	1	1	1	93	4	1	1	97	3	1	1	95	2
GO:MF	collagen binding	GO:0005518	69	20212	1	1	-1	-1	1	1	-1	-1	1	1	97	2	1	1	-1	-1
GO:MF	lamin binding	GO:0005521	16	20212	1	1	95	1	1	1	-1	-1	1	1	97	1	1	1	-1	-1
GO:MF	ATP binding	GO:0005524	1500	20212	1	1	95	14	1	1	93	9	1	1	97	13	1	1	95	13
GO:MF	GTP binding	GO:0005525	391	20212	1	1	95	2	1	1	93	1	1	1	97	2	1	1	95	2
GO:MF	glycosaminoglycan binding	GO:0005539	247	20212	1	1	-1	-1	1	1	93	1	1	1	97	2	1	1	95	2
GO:MF	chemokine activity	GO:0008009	50	20212	1	1	-1	-1	1	1	93	1	1	1	97	1	1	1	95	1
GO:MF	microtubule binding	GO:0008017	278	20212	1	1	95	3	1	1	93	1	1	1	97	1	1	1	95	1
GO:MF	enzyme activator activity	GO:0008047	585	20212	1	1	95	6	1	1	93	1	1	1	97	2	1	1	95	3
GO:MF	growth factor activity	GO:0008083	162	20212	1	1	-1	-1	1	1	93	2	1	1	97	3	1	1	-1	-1
GO:MF	cytoskeletal protein binding	GO:0008092	1002	20212	1	1	95	10	1	1	93	10	1	1	97	7	1	1	95	6
GO:MF	transcription factor binding	GO:0008134	600	20212	1	1	95	8	1	1	93	4	1	1	97	6	1	1	95	3
GO:MF	methyltransferase activity	GO:0008168	228	20212	1	1	95	1	1	1	-1	-1	1	1	97	1	1	1	-1	-1
GO:MF	S-methyltransferase activity	GO:0008172	10	20212	1	1	-1	-1	1	1	-1	-1	1	1	97	1	1	1	-1	-1
GO:MF	UDP-glycosyltransferase activity	GO:0008194	146	20212	1	1	95	2	1	1	93	1	1	1	97	1	1	1	-1	-1
GO:MF	peptidase activity	GO:0008233	625	20212	1	1	95	4	1	1	93	2	1	1	97	2	1	1	95	6
GO:MF	enzyme inhibitor activity	GO:0004857	390	20212	1	1	95	3	1	1	93	1	1	1	97	2	1	1	95	3
GO:MF	non-membrane spanning protein tyrosine kinase activity	GO:0004715	45	20212	1	1	95	2	1	1	-1	-1	1	1	97	2	1	1	95	1
GO:MF	acyl binding	GO:0000035	2	20212	1	1	-1	-1	1	1	-1	-1	1	1	97	1	1	1	-1	-1
GO:MF	transcription cis-regulatory region binding	GO:0000976	1480	20212	1	1	95	7	1	1	93	5	1	1	97	13	1	1	95	7
GO:MF	RNA polymerase II transcription regulatory region sequence-specific DNA binding	GO:0000977	1383	20212	1	1	95	5	1	1	93	4	1	1	97	13	1	1	95	7
GO:MF	RNA polymerase II cis-regulatory region sequence-specific DNA binding	GO:0000978	1180	20212	1	1	95	5	1	1	93	4	1	1	97	10	1	1	95	7
GO:MF	DNA-binding transcription factor activity, RNA polymerase II-specific	GO:0000981	1351	20212	1	1	95	5	1	1	93	5	1	1	97	13	1	1	95	7
GO:MF	RNA binding	GO:0003723	3123	20212	1	1	95	17	1	1	93	2	1	1	97	2	1	1	95	8
GO:MF	double-stranded RNA binding	GO:0003725	73	20212	1	1	-1	-1	1	1	-1	-1	1	1	97	1	1	1	-1	-1
GO:MF	double-stranded RNA adenosine deaminase activity	GO:0003726	6	20212	1	1	-1	-1	1	1	-1	-1	1	1	97	1	1	1	-1	-1
GO:MF	single-stranded RNA binding	GO:0003727	86	20212	1	1	95	1	1	1	-1	-1	1	1	97	2	1	1	-1	-1
GO:MF	mRNA binding	GO:0003729	369	20212	1	1	95	3	1	1	-1	-1	1	1	97	1	1	1	95	2
GO:MF	actin binding	GO:0003779	443	20212	1	1	95	5	1	1	93	3	1	1	97	2	1	1	95	2
GO:MF	GTPase activity	GO:0003924	335	20212	1	1	95	1	1	1	-1	-1	1	1	97	2	1	1	95	1
GO:MF	adenosine deaminase activity	GO:0004000	13	20212	1	1	-1	-1	1	1	-1	-1	1	1	97	1	1	1	-1	-1
GO:MF	aldehyde dehydrogenase (NAD+) activity	GO:0004029	15	20212	1	1	95	1	1	1	-1	-1	1	1	97	1	1	1	-1	-1
GO:MF	aldehyde dehydrogenase [NAD(P)+] activity	GO:0004030	17	20212	1	1	95	1	1	1	-1	-1	1	1	97	1	1	1	-1	-1
GO:MF	endopeptidase activity	GO:0004175	396	20212	1	1	95	4	1	1	93	1	1	1	97	1	1	1	95	5
GO:MF	carboxypeptidase activity	GO:0004180	47	20212	1	1	-1	-1	1	1	-1	-1	1	1	97	1	1	1	-1	-1
GO:MF	metallocarboxypeptidase activity	GO:0004181	30	20212	1	1	-1	-1	1	1	-1	-1	1	1	97	1	1	1	-1	-1
GO:MF	metalloendopeptidase activity	GO:0004222	109	20212	1	1	95	1	1	1	93	1	1	1	97	1	1	1	95	3
GO:MF	fructose-bisphosphate aldolase activity	GO:0004332	3	20212	1	1	-1	-1	1	1	-1	-1	1	1	97	1	1	1	-1	-1
GO:MF	histidine ammonia-lyase activity	GO:0004397	1	20212	1	1	-1	-1	1	1	-1	-1	1	1	97	1	1	1	-1	-1
GO:MF	monooxygenase activity	GO:0004497	104	20212	1	1	-1	-1	1	1	93	1	1	1	97	2	1	1	95	1
GO:MF	dopamine beta-monooxygenase activity	GO:0004500	2	20212	1	1	-1	-1	1	1	-1	-1	1	1	97	1	1	1	-1	-1
GO:MF	protein-arginine deiminase activity	GO:0004668	5	20212	1	1	-1	-1	1	1	-1	-1	1	1	97	1	1	1	-1	-1
GO:MF	protein serine/threonine kinase activity	GO:0004674	434	20212	1	1	95	4	1	1	93	1	1	1	97	3	1	1	95	3
GO:MF	calmodulin-dependent protein kinase activity	GO:0004683	27	20212	1	1	-1	-1	1	1	93	1	1	1	97	1	1	1	-1	-1
GO:MF	diacylglycerol-dependent serine/threonine kinase activity	GO:0004697	16	20212	1	1	95	1	1	1	-1	-1	1	1	97	1	1	1	-1	-1
GO:MF	calcium,diacylglycerol-dependent serine/threonine kinase activity	GO:0004698	2	20212	1	1	-1	-1	1	1	-1	-1	1	1	97	1	1	1	-1	-1
GO:MF	protein serine/threonine/tyrosine kinase activity	GO:0004712	43	20212	1	1	-1	-1	1	1	-1	-1	1	1	97	1	1	1	-1	-1
GO:MF	transcription corepressor activity	GO:0003714	197	20212	1	1	95	3	1	1	93	1	1	1	97	1	1	1	95	2
GO:MF	ubiquitin-protein transferase activity	GO:0004842	453	20212	1	1	95	2	1	1	93	3	1	1	97	4	1	1	95	3
GO:MF	transcription coactivator activity	GO:0003713	290	20212	1	1	95	5	1	1	-1	-1	1	1	97	1	1	1	95	1
GO:MF	cis-regulatory region sequence-specific DNA binding	GO:0000987	1203	20212	1	1	95	5	1	1	93	5	1	1	97	10	1	1	95	7
GO:MF	RNA polymerase II complex binding	GO:0000993	35	20212	1	1	-1	-1	1	1	-1	-1	1	1	97	1	1	1	-1	-1
GO:MF	transcription regulatory region nucleic acid binding	GO:0001067	1482	20212	1	1	95	7	1	1	93	5	1	1	97	13	1	1	95	7
GO:MF	basal transcription machinery binding	GO:0001098	60	20212	1	1	95	1	1	1	-1	-1	1	1	97	1	1	1	-1	-1
GO:MF	basal RNA polymerase II transcription machinery binding	GO:0001099	60	20212	1	1	95	1	1	1	-1	-1	1	1	97	1	1	1	-1	-1
GO:MF	DNA-binding transcription repressor activity	GO:0001217	332	20212	1	1	-1	-1	1	1	93	1	1	1	97	3	1	1	95	1
GO:MF	DNA-binding transcription repressor activity, RNA polymerase II-specific	GO:0001227	323	20212	1	1	-1	-1	1	1	93	1	1	1	97	3	1	1	95	1
GO:MF	amyloid-beta binding	GO:0001540	84	20212	1	1	95	1	1	1	93	2	1	1	97	2	1	1	-1	-1
GO:MF	purinergic nucleotide receptor activity	GO:0001614	22	20212	1	1	-1	-1	1	1	-1	-1	1	1	97	1	1	1	-1	-1
GO:MF	peptide receptor activity	GO:0001653	130	20212	1	1	-1	-1	1	1	93	3	1	1	97	1	1	1	95	2
GO:MF	G protein-coupled receptor binding	GO:0001664	292	20212	1	1	-1	-1	1	1	93	4	1	1	97	5	1	1	95	1
GO:MF	prenylcysteine oxidase activity	GO:0001735	2	20212	1	1	-1	-1	1	1	-1	-1	1	1	97	1	1	1	-1	-1
GO:MF	retinal dehydrogenase activity	GO:0001758	9	20212	1	1	-1	-1	1	1	-1	-1	1	1	97	1	1	1	-1	-1
GO:MF	phosphotyrosine residue binding	GO:0001784	47	20212	1	1	95	2	1	1	-1	-1	1	1	97	1	1	1	-1	-1
GO:MF	retinoic acid binding	GO:0001972	20	20212	1	1	-1	-1	1	1	-1	-1	1	1	97	1	1	1	-1	-1
GO:MF	protease binding	GO:0002020	143	20212	1	1	-1	-1	1	1	-1	-1	1	1	97	2	1	1	95	1
GO:MF	nucleobase binding	GO:0002054	4	20212	1	1	-1	-1	1	1	-1	-1	1	1	97	1	1	1	-1	-1
GO:MF	uracil binding	GO:0002058	1	20212	1	1	-1	-1	1	1	-1	-1	1	1	97	1	1	1	-1	-1
GO:MF	pyrimidine nucleobase binding	GO:0002061	1	20212	1	1	-1	-1	1	1	-1	-1	1	1	97	1	1	1	-1	-1
GO:MF	molecular_function	GO:0003674	20212	20212	1	1	95	95	1	1	93	93	1	1	97	97	1	1	95	95
GO:MF	nucleic acid binding	GO:0003676	5491	20212	1	1	95	27	1	1	93	7	1	1	97	17	1	1	95	19
GO:MF	DNA binding	GO:0003677	2532	20212	1	1	95	15	1	1	93	6	1	1	97	15	1	1	95	11
GO:MF	double-stranded DNA binding	GO:0003690	1637	20212	1	1	95	11	1	1	93	5	1	1	97	14	1	1	95	9
GO:MF	DNA-binding transcription factor activity	GO:0003700	1439	20212	1	1	95	5	1	1	93	5	1	1	97	13	1	1	95	7
GO:MF	transcription coregulator activity	GO:0003712	524	20212	1	1	95	6	1	1	93	1	1	1	97	2	1	1	95	4
GO:MF	chloride transmembrane transporter activity	GO:0015108	117	20212	1	1	-1	-1	1	1	93	2	1	1	97	3	1	1	95	1
GO:MF	iodide transmembrane transporter activity	GO:0015111	5	20212	1	1	-1	-1	1	1	-1	-1	1	1	97	1	1	1	-1	-1
GO:MF	carbohydrate transmembrane transporter activity	GO:0015144	41	20212	1	1	-1	-1	1	1	-1	-1	1	1	97	2	1	1	-1	-1
GO:MF	Wnt receptor activity	GO:0042813	16	20212	1	1	-1	-1	1	1	-1	-1	1	1	97	1	1	1	-1	-1
GO:MF	histone deacetylase binding	GO:0042826	127	20212	1	1	95	1	1	1	-1	-1	1	1	97	2	1	1	95	1
GO:MF	amide transmembrane transporter activity	GO:0042887	38	20212	1	1	-1	-1	1	1	-1	-1	1	1	97	1	1	1	-1	-1
GO:MF	xenobiotic transmembrane transporter activity	GO:0042910	37	20212	1	1	95	1	1	1	-1	-1	1	1	97	1	1	1	-1	-1
GO:MF	glucoside transmembrane transporter activity	GO:0042947	3	20212	1	1	-1	-1	1	1	-1	-1	1	1	97	1	1	1	-1	-1
GO:MF	nuclear retinoic acid receptor binding	GO:0042974	26	20212	1	1	-1	-1	1	1	-1	-1	1	1	97	1	1	1	-1	-1
GO:MF	ATP-dependent protein binding	GO:0043008	6	20212	1	1	-1	-1	1	1	-1	-1	1	1	97	1	1	1	-1	-1
GO:MF	neurotrophin binding	GO:0043121	10	20212	1	1	-1	-1	1	1	93	1	1	1	97	1	1	1	-1	-1
GO:MF	ion binding	GO:0043167	6146	20212	1	1	95	39	1	1	93	35	1	1	97	41	1	1	95	38
GO:MF	anion binding	GO:0043168	2452	20212	1	1	95	18	1	1	93	14	1	1	97	19	1	1	95	19
GO:MF	cation binding	GO:0043169	4444	20212	1	1	95	29	1	1	93	27	1	1	97	29	1	1	95	22
GO:MF	actinin binding	GO:0042805	37	20212	1	1	-1	-1	1	1	93	2	1	1	97	1	1	1	95	1
GO:MF	RNA polymerase core enzyme binding	GO:0043175	40	20212	1	1	-1	-1	1	1	-1	-1	1	1	97	1	1	1	-1	-1
GO:MF	alcohol binding	GO:0043178	89	20212	1	1	-1	-1	1	1	93	2	1	1	97	1	1	1	95	1
GO:MF	laminin binding	GO:0043236	28	20212	1	1	-1	-1	1	1	-1	-1	1	1	97	1	1	1	-1	-1
GO:MF	laminin-1 binding	GO:0043237	7	20212	1	1	-1	-1	1	1	-1	-1	1	1	97	1	1	1	-1	-1
GO:MF	proteoglycan binding	GO:0043394	36	20212	1	1	-1	-1	1	1	-1	-1	1	1	97	1	1	1	-1	-1
GO:MF	bHLH transcription factor binding	GO:0043425	32	20212	1	1	-1	-1	1	1	93	1	1	1	97	1	1	1	-1	-1
GO:MF	MRF binding	GO:0043426	5	20212	1	1	-1	-1	1	1	-1	-1	1	1	97	1	1	1	-1	-1
GO:MF	sequence-specific DNA binding	GO:0043565	1654	20212	1	1	95	9	1	1	93	6	1	1	97	14	1	1	95	7
GO:MF	glyceraldehyde-3-phosphate dehydrogenase (NAD+) (non-phosphorylating) activity	GO:0043878	7	20212	1	1	95	1	1	1	-1	-1	1	1	97	1	1	1	-1	-1
GO:MF	ubiquitin-like protein ligase binding	GO:0044389	326	20212	1	1	95	2	1	1	93	1	1	1	97	2	1	1	95	3
GO:MF	organic acid binding	GO:0043177	207	20212	1	1	95	1	1	1	93	1	1	1	97	2	1	1	95	1
GO:MF	protein homodimerization activity	GO:0042803	724	20212	1	1	95	3	1	1	93	7	1	1	97	8	1	1	95	2
GO:MF	identical protein binding	GO:0042802	2162	20212	1	1	95	13	1	1	93	14	1	1	97	12	1	1	95	15
GO:MF	ATPase-coupled transmembrane transporter activity	GO:0042626	100	20212	1	1	95	1	1	1	93	1	1	1	97	2	1	1	95	1
GO:MF	L-ascorbic acid binding	GO:0031418	21	20212	1	1	95	1	1	1	-1	-1	1	1	97	1	1	1	-1	-1
GO:MF	ubiquitin protein ligase binding	GO:0031625	308	20212	1	1	95	2	1	1	93	1	1	1	97	2	1	1	95	3
GO:MF	G-protein beta/gamma-subunit complex binding	GO:0031683	22	20212	1	1	-1	-1	1	1	-1	-1	1	1	97	1	1	1	95	1
GO:MF	type 5 metabotropic glutamate receptor binding	GO:0031802	6	20212	1	1	-1	-1	1	1	93	1	1	1	97	1	1	1	-1	-1
GO:MF	ribonucleotide binding	GO:0032553	1936	20212	1	1	95	15	1	1	93	10	1	1	97	15	1	1	95	16
GO:MF	purine ribonucleotide binding	GO:0032555	1919	20212	1	1	95	15	1	1	93	9	1	1	97	15	1	1	95	16
GO:MF	adenyl ribonucleotide binding	GO:0032559	1560	20212	1	1	95	14	1	1	93	9	1	1	97	13	1	1	95	14
GO:MF	guanyl ribonucleotide binding	GO:0032561	412	20212	1	1	95	2	1	1	93	1	1	1	97	2	1	1	95	3
GO:MF	amide binding	GO:0033218	398	20212	1	1	95	2	1	1	93	7	1	1	97	2	1	1	95	3
GO:MF	monocarboxylic acid binding	GO:0033293	80	20212	1	1	-1	-1	1	1	-1	-1	1	1	97	1	1	1	-1	-1
GO:MF	estrogen response element binding	GO:0034056	11	20212	1	1	95	1	1	1	-1	-1	1	1	97	1	1	1	-1	-1
GO:MF	G protein-coupled glutamate receptor binding	GO:0035256	11	20212	1	1	-1	-1	1	1	93	1	1	1	97	1	1	1	-1	-1
GO:MF	ATP-gated ion channel activity	GO:0035381	9	20212	1	1	-1	-1	1	1	-1	-1	1	1	97	1	1	1	-1	-1
GO:MF	purine ribonucleoside triphosphate binding	GO:0035639	1853	20212	1	1	95	15	1	1	93	9	1	1	97	15	1	1	95	14
GO:MF	oligopeptide transmembrane transporter activity	GO:0035673	11	20212	1	1	-1	-1	1	1	-1	-1	1	1	97	1	1	1	-1	-1
GO:MF	small molecule binding	GO:0036094	6357	20212	1	1	95	42	1	1	93	37	1	1	97	44	1	1	95	40
GO:MF	cargo receptor activity	GO:0038024	88	20212	1	1	-1	-1	1	1	93	2	1	1	97	1	1	1	-1	-1
GO:MF	vascular endothelial growth factor binding	GO:0038085	4	20212	1	1	-1	-1	1	1	-1	-1	1	1	97	1	1	1	-1	-1
GO:MF	neurexin family protein binding	GO:0042043	15	20212	1	1	-1	-1	1	1	93	1	1	1	97	1	1	1	-1	-1
GO:MF	MHC protein binding	GO:0042287	40	20212	1	1	-1	-1	1	1	-1	-1	1	1	97	1	1	1	-1	-1
GO:MF	chemokine receptor binding	GO:0042379	77	20212	1	1	-1	-1	1	1	93	1	1	1	97	1	1	1	95	1
GO:MF	hormone binding	GO:0042562	93	20212	1	1	95	1	1	1	93	1	1	1	97	1	1	1	-1	-1
GO:MF	translation regulator activity	GO:0045182	147	20212	1	1	-1	-1	1	1	-1	-1	1	1	97	1	1	1	95	2
GO:MF	CXCR chemokine receptor binding	GO:0045236	18	20212	1	1	-1	-1	1	1	-1	-1	1	1	97	1	1	1	-1	-1
GO:MF	cadherin binding	GO:0045296	335	20212	1	1	95	5	1	1	93	3	1	1	97	1	1	1	-1	-1
GO:MF	protein phosphorylated amino acid binding	GO:0045309	59	20212	1	1	95	2	1	1	-1	-1	1	1	97	1	1	1	-1	-1
GO:MF	nucleoside-triphosphatase regulator activity	GO:0060589	492	20212	1	1	95	3	1	1	-1	-1	1	1	97	1	1	1	95	3
GO:MF	peptidase regulator activity	GO:0061134	227	20212	1	1	95	1	1	1	93	1	1	1	97	2	1	1	95	2
GO:MF	endopeptidase regulator activity	GO:0061135	184	20212	1	1	95	1	1	1	93	1	1	1	97	2	1	1	95	1
GO:MF	fructose-1-phosphate aldolase activity	GO:0061609	1	20212	1	1	-1	-1	1	1	-1	-1	1	1	97	1	1	1	-1	-1
GO:MF	ubiquitin protein ligase activity	GO:0061630	354	20212	1	1	95	1	1	1	93	2	1	1	97	4	1	1	95	2
GO:MF	ubiquitin-like protein ligase activity	GO:0061659	372	20212	1	1	95	2	1	1	93	2	1	1	97	4	1	1	95	2
GO:MF	importin-alpha family protein binding	GO:0061676	9	20212	1	1	95	1	1	1	-1	-1	1	1	97	1	1	1	-1	-1
GO:MF	intracellular chloride channel activity	GO:0061778	19	20212	1	1	-1	-1	1	1	-1	-1	1	1	97	1	1	1	-1	-1
GO:MF	BBSome binding	GO:0062063	3	20212	1	1	-1	-1	1	1	-1	-1	1	1	97	1	1	1	-1	-1
GO:MF	fructose binding	GO:0070061	6	20212	1	1	-1	-1	1	1	-1	-1	1	1	97	1	1	1	-1	-1
GO:MF	RNA polymerase binding	GO:0070063	58	20212	1	1	95	1	1	1	-1	-1	1	1	97	1	1	1	95	1
GO:MF	growth factor receptor binding	GO:0070851	139	20212	1	1	-1	-1	1	1	93	1	1	1	97	2	1	1	95	1
GO:MF	E-box binding	GO:0070888	59	20212	1	1	-1	-1	1	1	-1	-1	1	1	97	1	1	1	-1	-1
GO:MF	icosanoid transmembrane transporter activity	GO:0071714	13	20212	1	1	-1	-1	1	1	-1	-1	1	1	97	1	1	1	-1	-1
GO:MF	FAD binding	GO:0071949	40	20212	1	1	-1	-1	1	1	-1	-1	1	1	97	1	1	1	-1	-1
GO:MF	voltage-gated potassium channel activity involved in cardiac muscle cell action potential repolarization	GO:0086008	15	20212	1	1	-1	-1	1	1	93	1	1	1	97	1	1	1	-1	-1
GO:MF	voltage-gated potassium channel activity involved in bundle of His cell action potential repolarization	GO:0086087	1	20212	1	1	-1	-1	1	1	93	1	1	1	97	1	1	1	-1	-1
GO:MF	voltage-gated potassium channel activity involved in atrial cardiac muscle cell action potential repolarization	GO:0086089	4	20212	1	1	-1	-1	1	1	93	1	1	1	97	1	1	1	-1	-1
GO:MF	voltage-gated potassium channel activity involved in SA node cell action potential repolarization	GO:0086090	1	20212	1	1	-1	-1	1	1	93	1	1	1	97	1	1	1	-1	-1
GO:MF	L27 domain binding	GO:0097016	4	20212	1	1	-1	-1	1	1	-1	-1	1	1	97	1	1	1	-1	-1
GO:MF	scaffold protein binding	GO:0097110	70	20212	1	1	95	1	1	1	93	3	1	1	97	2	1	1	95	1
GO:MF	organic cyclic compound binding	GO:0097159	7546	20212	1	1	95	43	1	1	93	21	1	1	97	37	1	1	95	34
GO:MF	carbohydrate derivative binding	GO:0097367	2304	20212	1	1	95	15	1	1	93	11	1	1	97	17	1	1	95	19
GO:MF	disordered domain specific binding	GO:0097718	29	20212	1	1	-1	-1	1	1	-1	-1	1	1	97	1	1	1	-1	-1
GO:MF	brain-derived neurotrophic factor receptor activity	GO:0060175	1	20212	1	1	-1	-1	1	1	-1	-1	1	1	97	1	1	1	-1	-1
GO:MF	carboxylic acid binding	GO:0031406	195	20212	1	1	95	1	1	1	93	1	1	1	97	2	1	1	95	1
GO:MF	molecular adaptor activity	GO:0060090	1136	20212	1	1	95	12	1	1	93	3	1	1	97	9	1	1	95	6
GO:MF	D-glucose transmembrane transporter activity	GO:0055056	12	20212	1	1	-1	-1	1	1	-1	-1	1	1	97	1	1	1	-1	-1
GO:MF	metal ion binding	GO:0046872	4354	20212	1	1	95	28	1	1	93	25	1	1	97	29	1	1	95	22
GO:MF	tetrapyrrole binding	GO:0046906	153	20212	1	1	95	1	1	1	93	3	1	1	97	1	1	1	95	2
GO:MF	transition metal ion binding	GO:0046914	1124	20212	1	1	95	11	1	1	93	4	1	1	97	10	1	1	95	8
GO:MF	protein heterodimerization activity	GO:0046982	363	20212	1	1	95	4	1	1	93	1	1	1	97	3	1	1	95	2
GO:MF	protein dimerization activity	GO:0046983	1113	20212	1	1	95	7	1	1	93	9	1	1	97	10	1	1	95	4
GO:MF	betaine-homocysteine S-methyltransferase activity	GO:0047150	1	20212	1	1	-1	-1	1	1	-1	-1	1	1	97	1	1	1	-1	-1
GO:MF	receptor ligand activity	GO:0048018	513	20212	1	1	-1	-1	1	1	93	5	1	1	97	5	1	1	95	2
GO:MF	monosaccharide binding	GO:0048029	77	20212	1	1	95	2	1	1	93	2	1	1	97	2	1	1	-1	-1
GO:MF	brain-derived neurotrophic factor binding	GO:0048403	4	20212	1	1	-1	-1	1	1	93	1	1	1	97	1	1	1	-1	-1
GO:MF	platelet-derived growth factor binding	GO:0048407	11	20212	1	1	-1	-1	1	1	-1	-1	1	1	97	1	1	1	95	1
GO:MF	flavin adenine dinucleotide binding	GO:0050660	90	20212	1	1	-1	-1	1	1	93	2	1	1	97	2	1	1	-1	-1
GO:MF	NADP binding	GO:0050661	52	20212	1	1	95	1	1	1	93	2	1	1	97	1	1	1	95	2
GO:MF	cell adhesion molecule binding	GO:0050839	561	20212	1	1	95	7	1	1	93	5	1	1	97	4	1	1	95	2
GO:MF	extracellular matrix binding	GO:0050840	60	20212	1	1	-1	-1	1	1	-1	-1	1	1	97	1	1	1	-1	-1
GO:MF	quaternary ammonium group binding	GO:0050997	40	20212	1	1	-1	-1	1	1	-1	-1	1	1	97	1	1	1	-1	-1
GO:MF	actin filament binding	GO:0051015	208	20212	1	1	95	5	1	1	93	1	1	1	97	1	1	1	95	1
GO:MF	protein-folding chaperone binding	GO:0051087	135	20212	1	1	-1	-1	1	1	93	1	1	1	97	1	1	1	-1	-1
GO:MF	ATPase binding	GO:0051117	84	20212	1	1	95	1	1	1	-1	-1	1	1	97	1	1	1	-1	-1
GO:MF	sugar transmembrane transporter activity	GO:0051119	30	20212	1	1	-1	-1	1	1	-1	-1	1	1	97	1	1	1	-1	-1
GO:MF	phosphoprotein binding	GO:0051219	94	20212	1	1	95	2	1	1	-1	-1	1	1	97	2	1	1	95	1
GO:MF	NAD binding	GO:0051287	53	20212	1	1	95	3	1	1	-1	-1	1	1	97	1	1	1	95	2
GO:MF	alpha-actinin binding	GO:0051393	28	20212	1	1	-1	-1	1	1	93	2	1	1	97	1	1	1	95	1
GO:MF	iron-sulfur cluster binding	GO:0051536	75	20212	1	1	-1	-1	1	1	-1	-1	1	1	97	1	1	1	-1	-1
GO:MF	4 iron, 4 sulfur cluster binding	GO:0051539	45	20212	1	1	-1	-1	1	1	-1	-1	1	1	97	1	1	1	-1	-1
GO:MF	metal cluster binding	GO:0051540	76	20212	1	1	-1	-1	1	1	-1	-1	1	1	97	1	1	1	-1	-1
GO:MF	ligand-activated transcription factor activity	GO:0098531	53	20212	1	1	95	2	1	1	-1	-1	1	1	97	1	1	1	-1	-1
GO:MF	GTPase regulator activity	GO:0030695	492	20212	1	1	95	3	1	1	-1	-1	1	1	97	1	1	1	95	3
GO:MF	nucleotide receptor activity	GO:0016502	22	20212	1	1	-1	-1	1	1	-1	-1	1	1	97	1	1	1	-1	-1
GO:MF	oxidoreductase activity, acting on the aldehyde or oxo group of donors, NAD or NADP as acceptor	GO:0016620	39	20212	1	1	95	1	1	1	-1	-1	1	1	97	1	1	1	-1	-1
GO:MF	oxidoreductase activity, acting on the CH-CH group of donors	GO:0016627	66	20212	1	1	95	2	1	1	-1	-1	1	1	97	1	1	1	-1	-1
GO:MF	oxidoreductase activity, acting on the CH-CH group of donors, NAD or NADP as acceptor	GO:0016628	36	20212	1	1	95	2	1	1	-1	-1	1	1	97	1	1	1	-1	-1
GO:MF	oxidoreductase activity, acting on a sulfur group of donors	GO:0016667	54	20212	1	1	-1	-1	1	1	-1	-1	1	1	97	1	1	1	-1	-1
GO:MF	oxidoreductase activity, acting on a sulfur group of donors, oxygen as acceptor	GO:0016670	11	20212	1	1	-1	-1	1	1	-1	-1	1	1	97	1	1	1	-1	-1
GO:MF	oxidoreductase activity, acting on paired donors, with incorporation or reduction of molecular oxygen	GO:0016705	178	20212	1	1	95	1	1	1	93	1	1	1	97	2	1	1	95	2
GO:MF	oxidoreductase activity, acting on paired donors, with incorporation or reduction of molecular oxygen, reduced flavin or flavoprotein as one donor, and incorporation of one atom of oxygen	GO:0016712	43	20212	1	1	-1	-1	1	1	-1	-1	1	1	97	1	1	1	95	1
GO:MF	oxidoreductase activity, acting on paired donors, with incorporation or reduction of molecular oxygen, reduced ascorbate as one donor, and incorporation of one atom of oxygen	GO:0016715	4	20212	1	1	-1	-1	1	1	-1	-1	1	1	97	1	1	1	-1	-1
GO:MF	transferase activity	GO:0016740	2350	20212	1	1	95	15	1	1	93	12	1	1	97	16	1	1	95	13
GO:MF	transferase activity, transferring one-carbon groups	GO:0016741	238	20212	1	1	95	1	1	1	-1	-1	1	1	97	1	1	1	-1	-1
GO:MF	protein-hormone receptor activity	GO:0016500	21	20212	1	1	-1	-1	1	1	93	2	1	1	97	1	1	1	-1	-1
GO:MF	acyltransferase activity	GO:0016746	733	20212	1	1	95	6	1	1	93	3	1	1	97	4	1	1	95	5
GO:MF	glycosyltransferase activity	GO:0016757	275	20212	1	1	95	2	1	1	93	2	1	1	97	1	1	1	95	2
GO:MF	transferase activity, transferring phosphorus-containing groups	GO:0016772	959	20212	1	1	95	5	1	1	93	5	1	1	97	10	1	1	95	8
GO:MF	phosphotransferase activity, alcohol group as acceptor	GO:0016773	697	20212	1	1	95	5	1	1	93	4	1	1	97	10	1	1	95	6
GO:MF	hydrolase activity, acting on carbon-nitrogen (but not peptide) bonds	GO:0016810	140	20212	1	1	95	2	1	1	93	1	1	1	97	2	1	1	95	1
GO:MF	hydrolase activity, acting on carbon-nitrogen (but not peptide) bonds, in linear amidines	GO:0016813	11	20212	1	1	-1	-1	1	1	-1	-1	1	1	97	1	1	1	-1	-1
GO:MF	hydrolase activity, acting on carbon-nitrogen (but not peptide) bonds, in cyclic amidines	GO:0016814	36	20212	1	1	-1	-1	1	1	-1	-1	1	1	97	1	1	1	-1	-1
GO:MF	hydrolase activity, acting on acid anhydrides	GO:0016817	795	20212	1	1	95	6	1	1	93	3	1	1	97	4	1	1	95	4
GO:MF	hydrolase activity, acting on acid anhydrides, in phosphorus-containing anhydrides	GO:0016818	795	20212	1	1	95	6	1	1	93	3	1	1	97	4	1	1	95	4
GO:MF	lyase activity	GO:0016829	202	20212	1	1	95	1	1	1	93	2	1	1	97	2	1	1	95	1
GO:MF	carbon-carbon lyase activity	GO:0016830	50	20212	1	1	95	1	1	1	-1	-1	1	1	97	1	1	1	95	1
GO:MF	aminoacyltransferase activity	GO:0016755	501	20212	1	1	95	3	1	1	93	3	1	1	97	4	1	1	95	4
GO:MF	oxidoreductase activity	GO:0016491	742	20212	1	1	95	8	1	1	93	3	1	1	97	5	1	1	95	4
GO:MF	pyrophosphatase activity	GO:0016462	794	20212	1	1	95	6	1	1	93	3	1	1	97	4	1	1	95	4
GO:MF	kinase activity	GO:0016301	787	20212	1	1	95	5	1	1	93	4	1	1	97	10	1	1	95	7
GO:MF	monosaccharide transmembrane transporter activity	GO:0015145	28	20212	1	1	-1	-1	1	1	-1	-1	1	1	97	1	1	1	-1	-1
GO:MF	hexose transmembrane transporter activity	GO:0015149	25	20212	1	1	-1	-1	1	1	-1	-1	1	1	97	1	1	1	-1	-1
GO:MF	alpha-glucoside transmembrane transporter activity	GO:0015151	2	20212	1	1	-1	-1	1	1	-1	-1	1	1	97	1	1	1	-1	-1
GO:MF	polyol transmembrane transporter activity	GO:0015166	11	20212	1	1	-1	-1	1	1	-1	-1	1	1	97	1	1	1	-1	-1
GO:MF	glycerol transmembrane transporter activity	GO:0015168	7	20212	1	1	-1	-1	1	1	-1	-1	1	1	97	1	1	1	-1	-1
GO:MF	water channel activity	GO:0015250	16	20212	1	1	-1	-1	1	1	-1	-1	1	1	97	1	1	1	-1	-1
GO:MF	outward rectifier potassium channel activity	GO:0015271	27	20212	1	1	95	1	1	1	93	2	1	1	97	1	1	1	-1	-1
GO:MF	secondary active transmembrane transporter activity	GO:0015291	283	20212	1	1	-1	-1	1	1	93	3	1	1	97	6	1	1	95	2
GO:MF	symporter activity	GO:0015293	147	20212	1	1	-1	-1	1	1	93	2	1	1	97	3	1	1	95	1
GO:MF	solute:monoatomic cation symporter activity	GO:0015294	117	20212	1	1	-1	-1	1	1	93	1	1	1	97	3	1	1	95	1
GO:MF	monoatomic anion:monoatomic cation symporter activity	GO:0015296	25	20212	1	1	-1	-1	1	1	-1	-1	1	1	97	2	1	1	95	1
GO:MF	antiporter activity	GO:0015297	135	20212	1	1	-1	-1	1	1	93	1	1	1	97	2	1	1	95	1
GO:MF	monoamine:proton antiporter activity	GO:0015311	4	20212	1	1	-1	-1	1	1	-1	-1	1	1	97	1	1	1	-1	-1
GO:MF	secondary active oligopeptide transmembrane transporter activity	GO:0015322	2	20212	1	1	-1	-1	1	1	-1	-1	1	1	97	1	1	1	-1	-1
GO:MF	solute:sodium symporter activity	GO:0015370	80	20212	1	1	-1	-1	1	1	93	1	1	1	97	3	1	1	-1	-1
GO:MF	monoatomic anion:sodium symporter activity	GO:0015373	18	20212	1	1	-1	-1	1	1	-1	-1	1	1	97	2	1	1	-1	-1
GO:MF	chloride:monoatomic cation symporter activity	GO:0015377	22	20212	1	1	-1	-1	1	1	-1	-1	1	1	97	1	1	1	95	1
GO:MF	sodium:chloride symporter activity	GO:0015378	16	20212	1	1	-1	-1	1	1	-1	-1	1	1	97	1	1	1	-1	-1
GO:MF	potassium:chloride symporter activity	GO:0015379	9	20212	1	1	-1	-1	1	1	-1	-1	1	1	97	1	1	1	95	1
GO:MF	primary active transmembrane transporter activity	GO:0015399	166	20212	1	1	95	1	1	1	93	1	1	1	97	2	1	1	95	1
GO:MF	acetylcholine receptor activity	GO:0015464	22	20212	1	1	-1	-1	1	1	-1	-1	1	1	97	1	1	1	-1	-1
GO:MF	tubulin binding	GO:0015631	389	20212	1	1	95	3	1	1	93	2	1	1	97	1	1	1	95	1
GO:MF	P-type ion transporter activity	GO:0015662	25	20212	1	1	95	1	1	1	93	1	1	1	97	2	1	1	-1	-1
GO:MF	aldehyde-lyase activity	GO:0016832	10	20212	1	1	-1	-1	1	1	-1	-1	1	1	97	1	1	1	-1	-1
GO:MF	carbon-nitrogen lyase activity	GO:0016840	15	20212	1	1	-1	-1	1	1	-1	-1	1	1	97	1	1	1	-1	-1
GO:MF	ammonia-lyase activity	GO:0016841	5	20212	1	1	-1	-1	1	1	-1	-1	1	1	97	1	1	1	-1	-1
GO:MF	ATP hydrolysis activity	GO:0016887	404	20212	1	1	95	3	1	1	93	3	1	1	97	2	1	1	95	3
GO:MF	active transmembrane transporter activity	GO:0022804	453	20212	1	1	95	1	1	1	93	4	1	1	97	8	1	1	95	3
GO:MF	acetylcholine-gated monoatomic cation-selective channel activity	GO:0022848	23	20212	1	1	-1	-1	1	1	93	1	1	1	97	1	1	1	-1	-1
GO:MF	MHC class Ib protein binding	GO:0023029	6	20212	1	1	-1	-1	1	1	-1	-1	1	1	97	1	1	1	-1	-1
GO:MF	extracellular matrix structural constituent conferring tensile strength	GO:0030020	45	20212	1	1	-1	-1	1	1	-1	-1	1	1	97	1	1	1	95	1
GO:MF	extracellular matrix structural constituent conferring compression resistance	GO:0030021	22	20212	1	1	-1	-1	1	1	-1	-1	1	1	97	1	1	1	-1	-1
GO:MF	PDZ domain binding	GO:0030165	85	20212	1	1	-1	-1	1	1	93	1	1	1	97	1	1	1	-1	-1
GO:MF	enzyme regulator activity	GO:0030234	1296	20212	1	1	95	12	1	1	93	2	1	1	97	4	1	1	95	8
GO:MF	carbohydrate binding	GO:0030246	287	20212	1	1	95	3	1	1	93	2	1	1	97	3	1	1	95	3
GO:MF	protein kinase activator activity	GO:0030295	123	20212	1	1	95	1	1	1	93	1	1	1	97	1	1	1	-1	-1
GO:MF	protein tyrosine kinase activator activity	GO:0030296	32	20212	1	1	-1	-1	1	1	93	1	1	1	97	1	1	1	-1	-1
GO:MF	receptor signaling protein tyrosine kinase activator activity	GO:0030298	5	20212	1	1	-1	-1	1	1	93	1	1	1	97	1	1	1	-1	-1
GO:MF	translation repressor activity	GO:0030371	32	20212	1	1	-1	-1	1	1	-1	-1	1	1	97	1	1	1	-1	-1
GO:MF	peptidase inhibitor activity	GO:0030414	174	20212	1	1	95	1	1	1	93	1	1	1	97	2	1	1	95	1
GO:MF	ankyrin binding	GO:0030506	19	20212	1	1	-1	-1	1	1	93	1	1	1	97	1	1	1	95	1
GO:MF	structural constituent of chromatin	GO:0030527	100	20212	1	1	-1	-1	1	1	-1	-1	1	1	97	1	1	1	-1	-1
GO:MF	signaling receptor regulator activity	GO:0030545	555	20212	1	1	-1	-1	1	1	93	5	1	1	97	5	1	1	95	2
GO:MF	signaling receptor activator activity	GO:0030546	519	20212	1	1	-1	-1	1	1	93	5	1	1	97	5	1	1	95	2
GO:MF	protein-macromolecule adaptor activity	GO:0030674	947	20212	1	1	95	11	1	1	93	3	1	1	97	6	1	1	95	6
GO:MF	heme binding	GO:0020037	143	20212	1	1	95	1	1	1	93	2	1	1	97	1	1	1	95	2
GO:MF	protein kinase binding	GO:0019901	706	20212	1	1	95	8	1	1	93	2	1	1	97	4	1	1	95	4
GO:MF	oxidoreductase activity, acting on the aldehyde or oxo group of donors	GO:0016903	49	20212	1	1	95	1	1	1	-1	-1	1	1	97	1	1	1	-1	-1
GO:MF	retinal binding	GO:0016918	19	20212	1	1	-1	-1	1	1	-1	-1	1	1	97	1	1	1	95	1
GO:MF	nuclear receptor binding	GO:0016922	139	20212	1	1	95	4	1	1	93	1	1	1	97	1	1	1	95	1
GO:MF	ribonucleoside triphosphate phosphatase activity	GO:0017111	734	20212	1	1	95	5	1	1	93	3	1	1	97	4	1	1	95	4
GO:MF	dihydropyrimidine dehydrogenase (NADP+) activity	GO:0017113	1	20212	1	1	-1	-1	1	1	-1	-1	1	1	97	1	1	1	-1	-1
GO:MF	Wnt-protein binding	GO:0017147	32	20212	1	1	-1	-1	1	1	-1	-1	1	1	97	1	1	1	-1	-1
GO:MF	benzaldehyde dehydrogenase (NAD+) activity	GO:0018479	3	20212	1	1	-1	-1	1	1	-1	-1	1	1	97	1	1	1	-1	-1
GO:MF	guanyl nucleotide binding	GO:0019001	412	20212	1	1	95	2	1	1	93	1	1	1	97	2	1	1	95	3
GO:MF	GDP binding	GO:0019003	73	20212	1	1	95	1	1	1	-1	-1	1	1	97	1	1	1	-1	-1
GO:MF	benzaldehyde dehydrogenase [NAD(P)+] activity	GO:0019115	4	20212	1	1	-1	-1	1	1	-1	-1	1	1	97	1	1	1	-1	-1
GO:MF	aminobutyraldehyde dehydrogenase activity	GO:0019145	2	20212	1	1	-1	-1	1	1	-1	-1	1	1	97	1	1	1	-1	-1
GO:MF	kinase regulator activity	GO:0019207	266	20212	1	1	95	2	1	1	93	1	1	1	97	1	1	1	95	1
GO:MF	kinase activator activity	GO:0019209	132	20212	1	1	95	1	1	1	93	1	1	1	97	1	1	1	-1	-1
GO:MF	deaminase activity	GO:0019239	33	20212	1	1	-1	-1	1	1	-1	-1	1	1	97	1	1	1	-1	-1
GO:MF	ubiquitin-like protein transferase activity	GO:0019787	484	20212	1	1	95	3	1	1	93	3	1	1	97	4	1	1	95	3
GO:MF	aspartic-type endopeptidase inhibitor activity	GO:0019828	8	20212	1	1	-1	-1	1	1	-1	-1	1	1	97	1	1	1	-1	-1
GO:MF	ATPase-coupled monoatomic cation transmembrane transporter activity	GO:0019829	55	20212	1	1	95	1	1	1	93	1	1	1	97	2	1	1	-1	-1
GO:MF	growth factor binding	GO:0019838	134	20212	1	1	95	1	1	1	93	3	1	1	97	2	1	1	95	2
GO:MF	isoprenoid binding	GO:0019840	38	20212	1	1	-1	-1	1	1	-1	-1	1	1	97	1	1	1	95	1
GO:MF	retinol binding	GO:0019841	16	20212	1	1	-1	-1	1	1	-1	-1	1	1	97	1	1	1	95	1
GO:MF	vitamin binding	GO:0019842	150	20212	1	1	95	2	1	1	93	1	1	1	97	2	1	1	95	2
GO:MF	protein kinase regulator activity	GO:0019887	227	20212	1	1	95	2	1	1	93	1	1	1	97	1	1	1	-1	-1
GO:MF	kinase binding	GO:0019900	790	20212	1	1	95	8	1	1	93	2	1	1	97	5	1	1	95	4
GO:MF	protein domain specific binding	GO:0019904	653	20212	1	1	95	6	1	1	93	5	1	1	97	3	1	1	95	1
GO:MF	prostaglandin transmembrane transporter activity	GO:0015132	12	20212	1	1	-1	-1	1	1	-1	-1	1	1	97	1	1	1	-1	-1
GO:MF	cell adhesion mediator activity	GO:0098631	67	20212	1	1	-1	-1	1	1	-1	-1	1	1	97	1	1	1	-1	-1
GO:MF	molecular function regulator activity	GO:0098772	2063	20212	1	1	95	14	1	1	93	7	1	1	97	10	1	1	95	11
GO:MF	cell-cell adhesion mediator activity	GO:0098632	52	20212	1	1	-1	-1	1	1	-1	-1	1	1	97	1	1	1	-1	-1
GO:MF	cupric ion binding	GO:1903135	4	20212	1	1	-1	-1	1	1	-1	-1	1	1	97	1	1	1	-1	-1
GO:MF	cuprous ion binding	GO:1903136	8	20212	1	1	-1	-1	1	1	-1	-1	1	1	97	1	1	1	-1	-1
GO:MF	peptide transmembrane transporter activity	GO:1904680	16	20212	1	1	-1	-1	1	1	-1	-1	1	1	97	1	1	1	-1	-1
GO:MF	all-trans-retinol binding	GO:1904768	3	20212	1	1	-1	-1	1	1	-1	-1	1	1	97	1	1	1	-1	-1
GO:MF	P-type calcium transporter activity involved in regulation of presynaptic cytosolic calcium ion concentration	GO:1905056	1	20212	1	1	-1	-1	1	1	-1	-1	1	1	97	1	1	1	-1	-1
GO:MF	ubiquitin ligase-substrate adaptor activity	GO:1990756	54	20212	1	1	95	1	1	1	-1	-1	1	1	97	1	1	1	-1	-1
GO:MF	protein tyrosine kinase binding	GO:1990782	125	20212	1	1	95	2	1	1	-1	-1	1	1	97	1	1	1	-1	-1
GO:MF	sequence-specific double-stranded DNA binding	GO:1990837	1541	20212	1	1	95	9	1	1	93	5	1	1	97	14	1	1	95	7
GO:MF	netrin receptor binding	GO:1990890	2	20212	1	1	-1	-1	1	1	-1	-1	1	1	97	1	1	1	-1	-1
GO:MF	salt transmembrane transporter activity	GO:1901702	11	20212	1	1	-1	-1	1	1	-1	-1	1	1	97	1	1	1	-1	-1
GO:MF	sulfur compound binding	GO:1901681	268	20212	1	1	-1	-1	1	1	-1	-1	1	1	97	1	1	1	95	2
GO:MF	organic hydroxy compound transmembrane transporter activity	GO:1901618	51	20212	1	1	-1	-1	1	1	93	1	1	1	97	1	1	1	95	1
GO:MF	carbohydrate derivative transmembrane transporter activity	GO:1901505	58	20212	1	1	-1	-1	1	1	-1	-1	1	1	97	1	1	1	-1	-1
GO:MF	structural constituent of synapse	GO:0098918	28	20212	1	1	-1	-1	1	1	-1	-1	1	1	97	1	1	1	-1	-1
GO:MF	ligand-gated monoatomic cation channel activity	GO:0099094	134	20212	1	1	95	1	1	1	93	4	1	1	97	2	1	1	-1	-1
GO:MF	structural constituent of postsynaptic intermediate filament cytoskeleton	GO:0099184	3	20212	1	1	-1	-1	1	1	-1	-1	1	1	97	1	1	1	-1	-1
GO:MF	structural constituent of postsynapse	GO:0099186	22	20212	1	1	-1	-1	1	1	-1	-1	1	1	97	1	1	1	-1	-1
GO:MF	voltage-gated monoatomic ion channel activity involved in regulation of presynaptic membrane potential	GO:0099508	12	20212	1	1	-1	-1	1	1	-1	-1	1	1	97	1	1	1	-1	-1
GO:MF	farnesylcysteine lyase activity	GO:0102149	1	20212	1	1	-1	-1	1	1	-1	-1	1	1	97	1	1	1	-1	-1
GO:MF	protein serine kinase activity	GO:0106310	359	20212	1	1	95	3	1	1	93	1	1	1	97	2	1	1	95	3
GO:MF	3-deoxyglucosone dehydrogenase activity	GO:0106373	1	20212	1	1	-1	-1	1	1	-1	-1	1	1	97	1	1	1	-1	-1
GO:MF	catalytic activity, acting on a protein	GO:0140096	2355	20212	1	1	95	18	1	1	93	8	1	1	97	16	1	1	95	19
GO:MF	transcription regulator activity	GO:0140110	1952	20212	1	1	95	11	1	1	93	6	1	1	97	15	1	1	95	11
GO:MF	DNA-binding transcription factor binding	GO:0140297	490	20212	1	1	95	8	1	1	93	2	1	1	97	5	1	1	95	2
GO:MF	protein sequestering activity	GO:0140311	27	20212	1	1	-1	-1	1	1	-1	-1	1	1	97	1	1	1	-1	-1
GO:MF	P-type transmembrane transporter activity	GO:0140358	25	20212	1	1	95	1	1	1	93	1	1	1	97	2	1	1	-1	-1
GO:MF	transcription regulator inhibitor activity	GO:0140416	24	20212	1	1	-1	-1	1	1	-1	-1	1	1	97	1	1	1	-1	-1
GO:MF	ATP-dependent activity	GO:0140657	580	20212	1	1	95	6	1	1	93	4	1	1	97	2	1	1	95	6
GO:MF	molecular function activator activity	GO:0140677	1124	20212	1	1	95	6	1	1	93	6	1	1	97	8	1	1	95	5
GO:MF	molecular function inhibitor activity	GO:0140678	497	20212	1	1	95	4	1	1	93	1	1	1	97	3	1	1	95	3
GO:MF	molecular condensate scaffold activity	GO:0140693	32	20212	1	1	-1	-1	1	1	-1	-1	1	1	97	1	1	1	-1	-1
GO:MF	enzyme-substrate adaptor activity	GO:0140767	66	20212	1	1	95	1	1	1	-1	-1	1	1	97	2	1	1	-1	-1
GO:MF	acetate ester transmembrane transporter activity	GO:1901375	4	20212	1	1	-1	-1	1	1	-1	-1	1	1	97	1	1	1	-1	-1
GO:MF	damaged DNA binding	GO:0003684	73	20212	1	1	95	1	1	1	-1	-1	1	1	-1	-1	1	1	95	1
GO:MF	single-stranded DNA binding	GO:0003697	121	20212	1	1	-1	-1	1	1	-1	-1	1	1	-1	-1	1	1	95	1
GO:MF	transcription elongation factor activity	GO:0003711	7	20212	1	1	95	1	1	1	-1	-1	1	1	-1	-1	1	1	95	1
GO:MF	leukotriene-C(4) hydrolase	GO:0002951	2	20212	1	1	-1	-1	1	1	-1	-1	1	1	-1	-1	1	1	95	1
GO:MF	RNA helicase activity	GO:0003724	76	20212	1	1	95	1	1	1	-1	-1	1	1	-1	-1	1	1	95	1
GO:MF	mRNA 3'-UTR binding	GO:0003730	111	20212	1	1	-1	-1	1	1	-1	-1	1	1	-1	-1	1	1	95	1
GO:MF	structural constituent of ribosome	GO:0003735	450	20212	1	1	95	1	1	1	-1	-1	1	1	-1	-1	1	1	95	1
GO:MF	translation initiation factor activity	GO:0003743	55	20212	1	1	-1	-1	1	1	-1	-1	1	1	-1	-1	1	1	95	2
GO:MF	peptidyl-prolyl cis-trans isomerase activity	GO:0003755	45	20212	1	1	-1	-1	1	1	-1	-1	1	1	-1	-1	1	1	95	2
GO:MF	cytoskeletal motor activity	GO:0003774	115	20212	1	1	95	1	1	1	93	2	1	1	-1	-1	1	1	95	1
GO:MF	antigen binding	GO:0003823	174	20212	1	1	-1	-1	1	1	93	1	1	1	-1	-1	1	1	95	1
GO:MF	dystroglycan binding	GO:0002162	11	20212	1	1	-1	-1	1	1	-1	-1	1	1	-1	-1	1	1	95	1
GO:MF	IgM binding	GO:0001791	3	20212	1	1	-1	-1	1	1	-1	-1	1	1	-1	-1	1	1	95	1
GO:MF	peptidyltransferase activity	GO:0000048	2	20212	1	1	-1	-1	1	1	-1	-1	1	1	-1	-1	1	1	95	1
GO:MF	microfilament motor activity	GO:0000146	36	20212	1	1	-1	-1	1	1	-1	-1	1	1	-1	-1	1	1	95	1
GO:MF	magnesium ion binding	GO:0000287	229	20212	1	1	95	5	1	1	-1	-1	1	1	-1	-1	1	1	95	2
GO:MF	pancreatic polypeptide receptor activity	GO:0001602	4	20212	1	1	-1	-1	1	1	-1	-1	1	1	-1	-1	1	1	95	1
GO:MF	NAD+ ADP-ribosyltransferase activity	GO:0003950	24	20212	1	1	-1	-1	1	1	-1	-1	1	1	-1	-1	1	1	95	1
GO:MF	adenylylsulfate kinase activity	GO:0004020	2	20212	1	1	-1	-1	1	1	-1	-1	1	1	-1	-1	1	1	95	1
GO:MF	3',5'-cyclic-nucleotide phosphodiesterase activity	GO:0004114	26	20212	1	1	-1	-1	1	1	-1	-1	1	1	-1	-1	1	1	95	2
GO:MF	cyclic-nucleotide phosphodiesterase activity	GO:0004112	28	20212	1	1	-1	-1	1	1	-1	-1	1	1	-1	-1	1	1	95	2
GO:MF	peptidase activator activity	GO:0016504	52	20212	1	1	-1	-1	1	1	-1	-1	1	1	-1	-1	1	1	95	1
GO:MF	peptidase activator activity involved in apoptotic process	GO:0016505	23	20212	1	1	-1	-1	1	1	-1	-1	1	1	-1	-1	1	1	95	1
GO:MF	oxidoreductase activity, acting on CH-OH group of donors	GO:0016614	138	20212	1	1	95	3	1	1	-1	-1	1	1	-1	-1	1	1	95	2
GO:MF	malate dehydrogenase activity	GO:0016615	8	20212	1	1	95	1	1	1	-1	-1	1	1	-1	-1	1	1	95	1
GO:MF	oxidoreductase activity, acting on the CH-OH group of donors, NAD or NADP as acceptor	GO:0016616	128	20212	1	1	95	3	1	1	-1	-1	1	1	-1	-1	1	1	95	2
GO:MF	2-oxoglutarate-dependent dioxygenase activity	GO:0016706	61	20212	1	1	95	1	1	1	-1	-1	1	1	-1	-1	1	1	95	1
GO:MF	oxidoreductase activity, acting on paired donors, with incorporation or reduction of molecular oxygen, NAD(P)H as one donor, and incorporation of one atom of oxygen	GO:0016709	38	20212	1	1	-1	-1	1	1	93	1	1	1	-1	-1	1	1	95	1
GO:MF	phosphatidylinositol-3,4-bisphosphate 4-phosphatase activity	GO:0016316	2	20212	1	1	-1	-1	1	1	-1	-1	1	1	-1	-1	1	1	95	1
GO:MF	oxidoreductase activity, acting on CH or CH2 groups	GO:0016725	12	20212	1	1	-1	-1	1	1	-1	-1	1	1	-1	-1	1	1	95	1
GO:MF	acyltransferase activity, transferring groups other than amino-acyl groups	GO:0016747	225	20212	1	1	95	3	1	1	-1	-1	1	1	-1	-1	1	1	95	1
GO:MF	hexosyltransferase activity	GO:0016758	198	20212	1	1	95	2	1	1	93	1	1	1	-1	-1	1	1	95	1
GO:MF	pentosyltransferase activity	GO:0016763	52	20212	1	1	-1	-1	1	1	-1	-1	1	1	-1	-1	1	1	95	1
GO:MF	nucleotidyltransferase activity	GO:0016779	149	20212	1	1	95	1	1	1	93	1	1	1	-1	-1	1	1	95	2
GO:MF	hydrolase activity, acting on ester bonds	GO:0016788	768	20212	1	1	95	10	1	1	-1	-1	1	1	-1	-1	1	1	95	7
GO:MF	inositol bisphosphate phosphatase activity	GO:0016312	6	20212	1	1	-1	-1	1	1	-1	-1	1	1	-1	-1	1	1	95	1
GO:MF	lipase activity	GO:0016298	133	20212	1	1	95	2	1	1	-1	-1	1	1	-1	-1	1	1	95	1
GO:MF	oxaloacetate decarboxylase activity	GO:0008948	4	20212	1	1	95	1	1	1	-1	-1	1	1	-1	-1	1	1	95	1
GO:MF	electron transfer activity	GO:0009055	115	20212	1	1	95	3	1	1	-1	-1	1	1	-1	-1	1	1	95	1
GO:MF	heme transmembrane transporter activity	GO:0015232	9	20212	1	1	95	1	1	1	-1	-1	1	1	-1	-1	1	1	95	1
GO:MF	ABC-type heme transporter activity	GO:0015439	1	20212	1	1	-1	-1	1	1	-1	-1	1	1	-1	-1	1	1	95	1
GO:MF	efflux transmembrane transporter activity	GO:0015562	15	20212	1	1	-1	-1	1	1	-1	-1	1	1	-1	-1	1	1	95	1
GO:MF	alcohol transmembrane transporter activity	GO:0015665	6	20212	1	1	-1	-1	1	1	-1	-1	1	1	-1	-1	1	1	95	1
GO:MF	cyclosporin A binding	GO:0016018	20	20212	1	1	-1	-1	1	1	-1	-1	1	1	-1	-1	1	1	95	1
GO:MF	channel regulator activity	GO:0016247	148	20212	1	1	-1	-1	1	1	-1	-1	1	1	-1	-1	1	1	95	1
GO:MF	phosphatase activity	GO:0016791	281	20212	1	1	95	4	1	1	-1	-1	1	1	-1	-1	1	1	95	2
GO:MF	crossover junction DNA endonuclease activity	GO:0008821	8	20212	1	1	-1	-1	1	1	-1	-1	1	1	-1	-1	1	1	95	1
GO:MF	NEDD8 activating enzyme activity	GO:0019781	2	20212	1	1	-1	-1	1	1	-1	-1	1	1	-1	-1	1	1	95	1
GO:MF	oxygen binding	GO:0019825	34	20212	1	1	-1	-1	1	1	-1	-1	1	1	-1	-1	1	1	95	1
GO:MF	immunoglobulin binding	GO:0019865	24	20212	1	1	-1	-1	1	1	-1	-1	1	1	-1	-1	1	1	95	1
GO:MF	deacetylase activity	GO:0019213	39	20212	1	1	95	2	1	1	-1	-1	1	1	-1	-1	1	1	95	1
GO:MF	phosphatase binding	GO:0019902	190	20212	1	1	95	2	1	1	-1	-1	1	1	-1	-1	1	1	95	1
GO:MF	structural constituent of myelin sheath	GO:0019911	11	20212	1	1	-1	-1	1	1	93	1	1	1	-1	-1	1	1	95	1
GO:MF	protein phosphatase binding	GO:0019903	143	20212	1	1	95	2	1	1	-1	-1	1	1	-1	-1	1	1	95	1
GO:MF	nucleoside kinase activity	GO:0019206	9	20212	1	1	-1	-1	1	1	-1	-1	1	1	-1	-1	1	1	95	1
GO:MF	nucleobase-containing compound kinase activity	GO:0019205	44	20212	1	1	-1	-1	1	1	-1	-1	1	1	-1	-1	1	1	95	1
GO:MF	carboxy-lyase activity	GO:0016831	33	20212	1	1	95	1	1	1	-1	-1	1	1	-1	-1	1	1	95	1
GO:MF	isomerase activity	GO:0016853	172	20212	1	1	95	2	1	1	93	1	1	1	-1	-1	1	1	95	3
GO:MF	cis-trans isomerase activity	GO:0016859	48	20212	1	1	-1	-1	1	1	-1	-1	1	1	-1	-1	1	1	95	2
GO:MF	intramolecular oxidoreductase activity	GO:0016860	53	20212	1	1	95	2	1	1	-1	-1	1	1	-1	-1	1	1	95	1
GO:MF	intramolecular oxidoreductase activity, transposing C=C bonds	GO:0016863	16	20212	1	1	-1	-1	1	1	-1	-1	1	1	-1	-1	1	1	95	1
GO:MF	ligase activity	GO:0016874	175	20212	1	1	95	3	1	1	93	1	1	1	-1	-1	1	1	95	1
GO:MF	ligase activity, forming carbon-sulfur bonds	GO:0016877	42	20212	1	1	95	1	1	1	93	1	1	1	-1	-1	1	1	95	1
GO:MF	DNA endonuclease activity, producing 3'-phosphomonoesters	GO:0016889	10	20212	1	1	-1	-1	1	1	-1	-1	1	1	-1	-1	1	1	95	1
GO:MF	endonuclease activity, active with either ribo- or deoxyribonucleic acids and producing 3'-phosphomonoesters	GO:0016894	18	20212	1	1	-1	-1	1	1	-1	-1	1	1	-1	-1	1	1	95	1
GO:MF	TBP-class protein binding	GO:0017025	25	20212	1	1	-1	-1	1	1	-1	-1	1	1	-1	-1	1	1	95	1
GO:MF	6-phosphogluconolactonase activity	GO:0017057	2	20212	1	1	-1	-1	1	1	-1	-1	1	1	-1	-1	1	1	95	1
GO:MF	fibroblast growth factor binding	GO:0017134	23	20212	1	1	95	1	1	1	93	1	1	1	-1	-1	1	1	95	1
GO:MF	NAD-dependent histone deacetylase activity	GO:0017136	5	20212	1	1	-1	-1	1	1	-1	-1	1	1	-1	-1	1	1	95	1
GO:MF	inositol-1,3,4-trisphosphate 4-phosphatase activity	GO:0017161	2	20212	1	1	-1	-1	1	1	-1	-1	1	1	-1	-1	1	1	95	1
GO:MF	serine hydrolase activity	GO:0017171	202	20212	1	1	95	2	1	1	-1	-1	1	1	-1	-1	1	1	95	3
GO:MF	deoxynucleoside kinase activity	GO:0019136	5	20212	1	1	-1	-1	1	1	-1	-1	1	1	-1	-1	1	1	95	1
GO:MF	hydrolase activity, acting on carbon-nitrogen (but not peptide) bonds, in linear amides	GO:0016811	74	20212	1	1	95	2	1	1	93	1	1	1	-1	-1	1	1	95	1
GO:MF	ubiquitin-like modifier activating enzyme activity	GO:0008641	10	20212	1	1	-1	-1	1	1	-1	-1	1	1	-1	-1	1	1	95	1
GO:MF	ammonium transmembrane transporter activity	GO:0008519	12	20212	1	1	-1	-1	1	1	93	1	1	1	-1	-1	1	1	95	1
GO:MF	phosphoprotein phosphatase activity	GO:0004721	185	20212	1	1	95	2	1	1	-1	-1	1	1	-1	-1	1	1	95	1
GO:MF	protein tyrosine phosphatase activity	GO:0004725	100	20212	1	1	95	1	1	1	-1	-1	1	1	-1	-1	1	1	95	1
GO:MF	sulfate adenylyltransferase activity	GO:0004779	2	20212	1	1	-1	-1	1	1	-1	-1	1	1	-1	-1	1	1	95	1
GO:MF	sulfate adenylyltransferase (ATP) activity	GO:0004781	2	20212	1	1	-1	-1	1	1	-1	-1	1	1	-1	-1	1	1	95	1
GO:MF	ubiquitin activating enzyme activity	GO:0004839	4	20212	1	1	-1	-1	1	1	-1	-1	1	1	-1	-1	1	1	95	1
GO:MF	MAP kinase kinase kinase activity	GO:0004709	26	20212	1	1	-1	-1	1	1	-1	-1	1	1	-1	-1	1	1	95	1
GO:MF	tumor necrosis factor receptor activity	GO:0005031	10	20212	1	1	-1	-1	1	1	-1	-1	1	1	-1	-1	1	1	95	1
GO:MF	death receptor activity	GO:0005035	13	20212	1	1	-1	-1	1	1	-1	-1	1	1	-1	-1	1	1	95	1
GO:MF	guanyl-nucleotide exchange factor activity	GO:0005085	231	20212	1	1	95	1	1	1	-1	-1	1	1	-1	-1	1	1	95	1
GO:MF	MAP kinase activity	GO:0004707	16	20212	1	1	-1	-1	1	1	-1	-1	1	1	-1	-1	1	1	95	1
GO:MF	cyclin-dependent protein serine/threonine kinase activity	GO:0004693	29	20212	1	1	-1	-1	1	1	-1	-1	1	1	-1	-1	1	1	95	1
GO:MF	deoxyadenosine kinase activity	GO:0004136	3	20212	1	1	-1	-1	1	1	-1	-1	1	1	-1	-1	1	1	95	1
GO:MF	deoxycytidine kinase activity	GO:0004137	2	20212	1	1	-1	-1	1	1	-1	-1	1	1	-1	-1	1	1	95	1
GO:MF	deoxyguanosine kinase activity	GO:0004138	2	20212	1	1	-1	-1	1	1	-1	-1	1	1	-1	-1	1	1	95	1
GO:MF	aminopeptidase activity	GO:0004177	39	20212	1	1	-1	-1	1	1	93	1	1	1	-1	-1	1	1	95	1
GO:MF	serine-type endopeptidase activity	GO:0004252	180	20212	1	1	95	2	1	1	-1	-1	1	1	-1	-1	1	1	95	3
GO:MF	glucose dehydrogenase activity	GO:0004344	1	20212	1	1	-1	-1	1	1	-1	-1	1	1	-1	-1	1	1	95	1
GO:MF	glucose-6-phosphate dehydrogenase activity	GO:0004345	2	20212	1	1	-1	-1	1	1	-1	-1	1	1	-1	-1	1	1	95	1
GO:MF	helicase activity	GO:0004386	160	20212	1	1	95	2	1	1	-1	-1	1	1	-1	-1	1	1	95	1
GO:MF	histone deacetylase activity	GO:0004407	22	20212	1	1	95	1	1	1	-1	-1	1	1	-1	-1	1	1	95	1
GO:MF	phosphatidylinositol phospholipase C activity	GO:0004435	26	20212	1	1	-1	-1	1	1	-1	-1	1	1	-1	-1	1	1	95	1
GO:MF	isopentenyl-diphosphate delta-isomerase activity	GO:0004452	2	20212	1	1	-1	-1	1	1	-1	-1	1	1	-1	-1	1	1	95	1
GO:MF	malic enzyme activity	GO:0004470	4	20212	1	1	95	1	1	1	-1	-1	1	1	-1	-1	1	1	95	1
GO:MF	malate dehydrogenase (decarboxylating) (NAD+) activity	GO:0004471	3	20212	1	1	95	1	1	1	-1	-1	1	1	-1	-1	1	1	95	1
GO:MF	malate dehydrogenase (decarboxylating) (NADP+) activity	GO:0004473	3	20212	1	1	95	1	1	1	-1	-1	1	1	-1	-1	1	1	95	1
GO:MF	nuclease activity	GO:0004518	214	20212	1	1	95	2	1	1	-1	-1	1	1	-1	-1	1	1	95	1
GO:MF	endonuclease activity	GO:0004519	130	20212	1	1	95	1	1	1	-1	-1	1	1	-1	-1	1	1	95	1
GO:MF	DNA endonuclease activity	GO:0004520	41	20212	1	1	-1	-1	1	1	-1	-1	1	1	-1	-1	1	1	95	1
GO:MF	DNA nuclease activity	GO:0004536	62	20212	1	1	-1	-1	1	1	-1	-1	1	1	-1	-1	1	1	95	1
GO:MF	phospholipase activity	GO:0004620	107	20212	1	1	95	1	1	1	-1	-1	1	1	-1	-1	1	1	95	1
GO:MF	phospholipase C activity	GO:0004629	29	20212	1	1	-1	-1	1	1	-1	-1	1	1	-1	-1	1	1	95	1
GO:MF	1,4-alpha-oligoglucan phosphorylase activity	GO:0004645	5	20212	1	1	-1	-1	1	1	-1	-1	1	1	-1	-1	1	1	95	1
GO:MF	tumor necrosis factor receptor binding	GO:0005164	32	20212	1	1	-1	-1	1	1	-1	-1	1	1	-1	-1	1	1	95	1
GO:MF	ATP-dependent activity, acting on DNA	GO:0008094	123	20212	1	1	95	1	1	1	-1	-1	1	1	-1	-1	1	1	95	2
GO:MF	translation factor activity, RNA binding	GO:0008135	93	20212	1	1	-1	-1	1	1	-1	-1	1	1	-1	-1	1	1	95	2
GO:MF	protein phosphatase 1 binding	GO:0008157	24	20212	1	1	-1	-1	1	1	-1	-1	1	1	-1	-1	1	1	95	1
GO:MF	glycogen phosphorylase activity	GO:0008184	3	20212	1	1	-1	-1	1	1	-1	-1	1	1	-1	-1	1	1	95	1
GO:MF	ATP-dependent activity, acting on RNA	GO:0008186	78	20212	1	1	95	1	1	1	-1	-1	1	1	-1	-1	1	1	95	1
GO:MF	neuropeptide receptor activity	GO:0008188	47	20212	1	1	-1	-1	1	1	93	1	1	1	-1	-1	1	1	95	2
GO:MF	phosphoric diester hydrolase activity	GO:0008081	90	20212	1	1	-1	-1	1	1	-1	-1	1	1	-1	-1	1	1	95	3
GO:MF	serine-type peptidase activity	GO:0008236	198	20212	1	1	95	2	1	1	-1	-1	1	1	-1	-1	1	1	95	3
GO:MF	omega peptidase activity	GO:0008242	17	20212	1	1	-1	-1	1	1	-1	-1	1	1	-1	-1	1	1	95	1
GO:MF	DNA binding, bending	GO:0008301	19	20212	1	1	-1	-1	1	1	-1	-1	1	1	-1	-1	1	1	95	1
GO:MF	steroid hydroxylase activity	GO:0008395	26	20212	1	1	-1	-1	1	1	-1	-1	1	1	-1	-1	1	1	95	1
GO:MF	axon guidance receptor activity	GO:0008046	11	20212	1	1	-1	-1	1	1	-1	-1	1	1	-1	-1	1	1	95	1
GO:MF	calcium channel regulator activity	GO:0005246	47	20212	1	1	-1	-1	1	1	-1	-1	1	1	-1	-1	1	1	95	1
GO:MF	zinc ion transmembrane transporter activity	GO:0005385	25	20212	1	1	-1	-1	1	1	-1	-1	1	1	-1	-1	1	1	95	1
GO:MF	macrolide binding	GO:0005527	12	20212	1	1	-1	-1	1	1	-1	-1	1	1	-1	-1	1	1	95	1
GO:MF	FK506 binding	GO:0005528	10	20212	1	1	-1	-1	1	1	-1	-1	1	1	-1	-1	1	1	95	1
GO:MF	phospholipid binding	GO:0005543	483	20212	1	1	95	3	1	1	93	2	1	1	-1	-1	1	1	95	1
GO:MF	extracellular matrix constituent conferring elasticity	GO:0030023	10	20212	1	1	-1	-1	1	1	-1	-1	1	1	-1	-1	1	1	95	1
GO:MF	manganese ion binding	GO:0030145	66	20212	1	1	95	1	1	1	-1	-1	1	1	-1	-1	1	1	95	2
GO:MF	signaling receptor complex adaptor activity	GO:0030159	50	20212	1	1	95	1	1	1	-1	-1	1	1	-1	-1	1	1	95	1
GO:MF	histone H3K27me2/H3K27me3 demethylase activity	GO:0071558	5	20212	1	1	-1	-1	1	1	-1	-1	1	1	-1	-1	1	1	95	1
GO:MF	voltage-gated sodium channel activity involved in cardiac muscle cell action potential	GO:0086006	5	20212	1	1	-1	-1	1	1	93	1	1	1	-1	-1	1	1	95	1
GO:MF	voltage-gated sodium channel activity involved in AV node cell action potential	GO:0086060	1	20212	1	1	-1	-1	1	1	93	1	1	1	-1	-1	1	1	95	1
GO:MF	voltage-gated sodium channel activity involved in bundle of His cell action potential	GO:0086061	1	20212	1	1	-1	-1	1	1	93	1	1	1	-1	-1	1	1	95	1
GO:MF	voltage-gated sodium channel activity involved in Purkinje myocyte action potential	GO:0086062	2	20212	1	1	-1	-1	1	1	93	1	1	1	-1	-1	1	1	95	1
GO:MF	voltage-gated sodium channel activity involved in SA node cell action potential	GO:0086063	1	20212	1	1	-1	-1	1	1	93	1	1	1	-1	-1	1	1	95	1
GO:MF	translation regulator activity, nucleic acid binding	GO:0090079	117	20212	1	1	-1	-1	1	1	-1	-1	1	1	-1	-1	1	1	95	2
GO:MF	vitamin transmembrane transporter activity	GO:0090482	34	20212	1	1	-1	-1	1	1	-1	-1	1	1	-1	-1	1	1	95	1
GO:MF	NAD-dependent histone H3K18 deacetylase activity	GO:0097372	2	20212	1	1	-1	-1	1	1	-1	-1	1	1	-1	-1	1	1	95	1
GO:MF	structural molecule activity conferring elasticity	GO:0097493	12	20212	1	1	-1	-1	1	1	-1	-1	1	1	-1	-1	1	1	95	1
GO:MF	ion channel regulator activity	GO:0099106	143	20212	1	1	-1	-1	1	1	-1	-1	1	1	-1	-1	1	1	95	1
GO:MF	estrogen 16-alpha-hydroxylase activity	GO:0101020	8	20212	1	1	-1	-1	1	1	-1	-1	1	1	-1	-1	1	1	95	1
GO:MF	estrogen 2-hydroxylase activity	GO:0101021	5	20212	1	1	-1	-1	1	1	-1	-1	1	1	-1	-1	1	1	95	1
GO:MF	linear malto-oligosaccharide phosphorylase activity	GO:0102250	3	20212	1	1	-1	-1	1	1	-1	-1	1	1	-1	-1	1	1	95	1
GO:MF	1,8-cineole 2-exo-monooxygenase activity	GO:0102320	1	20212	1	1	-1	-1	1	1	-1	-1	1	1	-1	-1	1	1	95	1
GO:MF	SHG alpha-glucan phosphorylase activity	GO:0102499	3	20212	1	1	-1	-1	1	1	-1	-1	1	1	-1	-1	1	1	95	1
GO:MF	leukotriene C4 gamma-glutamyl transferase activity	GO:0103068	4	20212	1	1	-1	-1	1	1	-1	-1	1	1	-1	-1	1	1	95	1
GO:MF	phosphatidylinositol-3,4-bisphosphate phosphatase activity	GO:0106017	4	20212	1	1	-1	-1	1	1	-1	-1	1	1	-1	-1	1	1	95	1
GO:MF	lncRNA binding	GO:0106222	17	20212	1	1	-1	-1	1	1	-1	-1	1	1	-1	-1	1	1	95	1
GO:MF	cyclin-dependent protein kinase activity	GO:0097472	29	20212	1	1	-1	-1	1	1	-1	-1	1	1	-1	-1	1	1	95	1
GO:MF	vitamin D 25-hydroxylase activity	GO:0070643	4	20212	1	1	-1	-1	1	1	-1	-1	1	1	-1	-1	1	1	95	1
GO:MF	vitamin D 24-hydroxylase activity	GO:0070576	3	20212	1	1	-1	-1	1	1	-1	-1	1	1	-1	-1	1	1	95	1
GO:MF	adenylyltransferase activity	GO:0070566	30	20212	1	1	95	1	1	1	-1	-1	1	1	-1	-1	1	1	95	1
GO:MF	inositol-3,4-bisphosphate 4-phosphatase activity	GO:0052828	2	20212	1	1	-1	-1	1	1	-1	-1	1	1	-1	-1	1	1	95	1
GO:MF	phosphatidylinositol phosphate phosphatase activity	GO:0052866	30	20212	1	1	-1	-1	1	1	-1	-1	1	1	-1	-1	1	1	95	1
GO:MF	ubiquitin conjugating enzyme activity	GO:0061631	33	20212	1	1	-1	-1	1	1	-1	-1	1	1	-1	-1	1	1	95	1
GO:MF	ubiquitin-like protein conjugating enzyme activity	GO:0061650	39	20212	1	1	95	1	1	1	-1	-1	1	1	-1	-1	1	1	95	1
GO:MF	vitamin D 23-hydroxylase activity	GO:0062179	2	20212	1	1	-1	-1	1	1	-1	-1	1	1	-1	-1	1	1	95	1
GO:MF	1-alpha,25-dihydroxyvitamin D3 23-hydroxylase activity	GO:0062181	2	20212	1	1	-1	-1	1	1	-1	-1	1	1	-1	-1	1	1	95	1
GO:MF	anandamide epoxidase activity	GO:0062186	4	20212	1	1	-1	-1	1	1	-1	-1	1	1	-1	-1	1	1	95	1
GO:MF	anandamide 8,9 epoxidase activity	GO:0062187	3	20212	1	1	-1	-1	1	1	-1	-1	1	1	-1	-1	1	1	95	1
GO:MF	anandamide 11,12 epoxidase activity	GO:0062188	3	20212	1	1	-1	-1	1	1	-1	-1	1	1	-1	-1	1	1	95	1
GO:MF	anandamide 14,15 epoxidase activity	GO:0062189	4	20212	1	1	-1	-1	1	1	-1	-1	1	1	-1	-1	1	1	95	1
GO:MF	threonine-type peptidase activity	GO:0070003	19	20212	1	1	-1	-1	1	1	-1	-1	1	1	-1	-1	1	1	95	1
GO:MF	metalloaminopeptidase activity	GO:0070006	25	20212	1	1	-1	-1	1	1	93	1	1	1	-1	-1	1	1	95	1
GO:MF	proline-rich region binding	GO:0070064	19	20212	1	1	95	2	1	1	-1	-1	1	1	-1	-1	1	1	95	1
GO:MF	vitamin B6 binding	GO:0070279	57	20212	1	1	95	1	1	1	-1	-1	1	1	-1	-1	1	1	95	1
GO:MF	aromatase activity	GO:0070330	25	20212	1	1	-1	-1	1	1	-1	-1	1	1	-1	-1	1	1	95	1
GO:MF	NAD+ binding	GO:0070403	16	20212	1	1	-1	-1	1	1	-1	-1	1	1	-1	-1	1	1	95	1
GO:MF	NAD+-protein-arginine ADP-ribosyltransferase activity	GO:0106274	6	20212	1	1	-1	-1	1	1	-1	-1	1	1	-1	-1	1	1	95	1
GO:MF	inositol phosphate phosphatase activity	GO:0052745	18	20212	1	1	-1	-1	1	1	-1	-1	1	1	-1	-1	1	1	95	1
GO:MF	methylation-dependent protein binding	GO:0140034	83	20212	1	1	95	2	1	1	-1	-1	1	1	-1	-1	1	1	95	1
GO:MF	TORC2 complex binding	GO:1904841	5	20212	1	1	-1	-1	1	1	-1	-1	1	1	-1	-1	1	1	95	1
GO:MF	preribosome binding	GO:1990275	8	20212	1	1	-1	-1	1	1	-1	-1	1	1	-1	-1	1	1	95	1
GO:MF	NAD+-protein ADP-ribosyltransferase activity	GO:1990404	23	20212	1	1	-1	-1	1	1	-1	-1	1	1	-1	-1	1	1	95	1
GO:MF	glycogen binding	GO:2001069	9	20212	1	1	-1	-1	1	1	-1	-1	1	1	-1	-1	1	1	95	1
GO:MF	transporter regulator activity	GO:0141108	148	20212	1	1	-1	-1	1	1	-1	-1	1	1	-1	-1	1	1	95	1
GO:MF	histone H4 demethylase activity	GO:0141058	5	20212	1	1	-1	-1	1	1	-1	-1	1	1	-1	-1	1	1	95	1
GO:MF	histone H3 demethylase activity	GO:0141052	29	20212	1	1	-1	-1	1	1	-1	-1	1	1	-1	-1	1	1	95	1
GO:MF	catalytic activity, acting on DNA	GO:0140097	248	20212	1	1	95	3	1	1	93	1	1	1	-1	-1	1	1	95	2
GO:MF	catalytic activity, acting on RNA	GO:0140098	399	20212	1	1	95	3	1	1	93	1	1	1	-1	-1	1	1	95	2
GO:MF	catalytic activity, acting on a tRNA	GO:0140101	134	20212	1	1	95	1	1	1	-1	-1	1	1	-1	-1	1	1	95	1
GO:MF	general transcription initiation factor binding	GO:0140296	53	20212	1	1	95	1	1	1	-1	-1	1	1	-1	-1	1	1	95	1
GO:MF	ABC-type transporter activity	GO:0140359	49	20212	1	1	-1	-1	1	1	-1	-1	1	1	-1	-1	1	1	95	1
GO:MF	immune receptor activity	GO:0140375	145	20212	1	1	-1	-1	1	1	93	2	1	1	-1	-1	1	1	95	1
GO:MF	protein demethylase activity	GO:0140457	31	20212	1	1	-1	-1	1	1	-1	-1	1	1	-1	-1	1	1	95	1
GO:MF	catalytic activity, acting on a nucleic acid	GO:0140640	623	20212	1	1	95	6	1	1	93	1	1	1	-1	-1	1	1	95	4
GO:MF	ATP-dependent DNA damage sensor activity	GO:0140664	18	20212	1	1	-1	-1	1	1	-1	-1	1	1	-1	-1	1	1	95	2
GO:MF	histone H3K36me/H3K36me2 demethylase activity	GO:0140680	4	20212	1	1	-1	-1	1	1	-1	-1	1	1	-1	-1	1	1	95	1
GO:MF	histone H3K9me/H3K9me2 demethylase activity	GO:0140683	5	20212	1	1	-1	-1	1	1	-1	-1	1	1	-1	-1	1	1	95	1
GO:MF	NAD-dependent histone H3K56 deacetylase activity	GO:0140765	1	20212	1	1	-1	-1	1	1	-1	-1	1	1	-1	-1	1	1	95	1
GO:MF	NAD-dependent protein demyristoylase activity	GO:0140773	2	20212	1	1	-1	-1	1	1	-1	-1	1	1	-1	-1	1	1	95	1
GO:MF	NAD-dependent protein depalmitoylase activity	GO:0140774	2	20212	1	1	-1	-1	1	1	-1	-1	1	1	-1	-1	1	1	95	1
GO:MF	histone phosphatase activity	GO:0140789	3	20212	1	1	-1	-1	1	1	-1	-1	1	1	-1	-1	1	1	95	1
GO:MF	histone H2AXY142 phosphatase activity	GO:0140793	3	20212	1	1	-1	-1	1	1	-1	-1	1	1	-1	-1	1	1	95	1
GO:MF	NAD+- protein-lysine ADP-ribosyltransferase activity	GO:0140804	5	20212	1	1	-1	-1	1	1	-1	-1	1	1	-1	-1	1	1	95	1
GO:MF	histone modifying activity	GO:0140993	212	20212	1	1	95	3	1	1	-1	-1	1	1	-1	-1	1	1	95	3
GO:MF	histone H3K deacetylase activity	GO:0141050	4	20212	1	1	-1	-1	1	1	-1	-1	1	1	-1	-1	1	1	95	1
GO:MF	modification-dependent protein binding	GO:0140030	185	20212	1	1	95	3	1	1	-1	-1	1	1	-1	-1	1	1	95	1
GO:MF	carboxylic ester hydrolase activity	GO:0052689	156	20212	1	1	95	4	1	1	-1	-1	1	1	-1	-1	1	1	95	1
GO:MF	histone H3K36 demethylase activity	GO:0051864	11	20212	1	1	-1	-1	1	1	-1	-1	1	1	-1	-1	1	1	95	1
GO:MF	histone H3K9 demethylase activity	GO:0032454	15	20212	1	1	-1	-1	1	1	-1	-1	1	1	-1	-1	1	1	95	1
GO:MF	copper-dependent protein binding	GO:0032767	3	20212	1	1	-1	-1	1	1	-1	-1	1	1	-1	-1	1	1	95	1
GO:MF	tumor necrosis factor receptor superfamily binding	GO:0032813	49	20212	1	1	-1	-1	1	1	-1	-1	1	1	-1	-1	1	1	95	1
GO:MF	protein lysine deacetylase activity	GO:0033558	23	20212	1	1	95	1	1	1	-1	-1	1	1	-1	-1	1	1	95	1
GO:MF	sialic acid binding	GO:0033691	21	20212	1	1	-1	-1	1	1	-1	-1	1	1	-1	-1	1	1	95	1
GO:MF	oxidoreductase activity, acting on CH or CH2 groups, quinone or similar compound as acceptor	GO:0033695	4	20212	1	1	-1	-1	1	1	-1	-1	1	1	-1	-1	1	1	95	1
GO:MF	histone demethylase activity	GO:0032452	31	20212	1	1	-1	-1	1	1	-1	-1	1	1	-1	-1	1	1	95	1
GO:MF	ubiquitin-ubiquitin ligase activity	GO:0034450	14	20212	1	1	-1	-1	1	1	-1	-1	1	1	-1	-1	1	1	95	1
GO:MF	phosphatidylinositol phosphate 4-phosphatase activity	GO:0034596	9	20212	1	1	-1	-1	1	1	-1	-1	1	1	-1	-1	1	1	95	1
GO:MF	retinol transmembrane transporter activity	GO:0034632	3	20212	1	1	-1	-1	1	1	-1	-1	1	1	-1	-1	1	1	95	1
GO:MF	caffeine oxidase activity	GO:0034875	4	20212	1	1	-1	-1	1	1	-1	-1	1	1	-1	-1	1	1	95	1
GO:MF	NAD-dependent protein deacetylase activity	GO:0034979	7	20212	1	1	-1	-1	1	1	-1	-1	1	1	-1	-1	1	1	95	1
GO:MF	methylated histone binding	GO:0035064	81	20212	1	1	95	2	1	1	-1	-1	1	1	-1	-1	1	1	95	1
GO:MF	nuclear glucocorticoid receptor binding	GO:0035259	12	20212	1	1	-1	-1	1	1	-1	-1	1	1	-1	-1	1	1	95	1
GO:MF	cAMP response element binding	GO:0035497	12	20212	1	1	-1	-1	1	1	-1	-1	1	1	-1	-1	1	1	95	1
GO:MF	histone H4K20 demethylase activity	GO:0035575	4	20212	1	1	-1	-1	1	1	-1	-1	1	1	-1	-1	1	1	95	1
GO:MF	signaling adaptor activity	GO:0035591	104	20212	1	1	95	2	1	1	-1	-1	1	1	-1	-1	1	1	95	1
GO:MF	phosphatidylinositol bisphosphate phosphatase activity	GO:0034593	26	20212	1	1	-1	-1	1	1	-1	-1	1	1	-1	-1	1	1	95	1
GO:MF	demethylase activity	GO:0032451	41	20212	1	1	-1	-1	1	1	-1	-1	1	1	-1	-1	1	1	95	1
GO:MF	inhibitory MHC class I receptor activity	GO:0032396	7	20212	1	1	-1	-1	1	1	-1	-1	1	1	-1	-1	1	1	95	1
GO:MF	MHC class I receptor activity	GO:0032393	11	20212	1	1	-1	-1	1	1	-1	-1	1	1	-1	-1	1	1	95	1
GO:MF	pyridoxal phosphate binding	GO:0030170	56	20212	1	1	95	1	1	1	-1	-1	1	1	-1	-1	1	1	95	1
GO:MF	polysaccharide binding	GO:0030247	26	20212	1	1	-1	-1	1	1	-1	-1	1	1	-1	-1	1	1	95	1
GO:MF	structural constituent of skin epidermis	GO:0030280	36	20212	1	1	-1	-1	1	1	-1	-1	1	1	-1	-1	1	1	95	1
GO:MF	vitamin D3 25-hydroxylase activity	GO:0030343	3	20212	1	1	-1	-1	1	1	-1	-1	1	1	-1	-1	1	1	95	1
GO:MF	spectrin binding	GO:0030507	26	20212	1	1	-1	-1	1	1	-1	-1	1	1	-1	-1	1	1	95	1
GO:MF	cyclic nucleotide binding	GO:0030551	37	20212	1	1	-1	-1	1	1	-1	-1	1	1	-1	-1	1	1	95	1
GO:MF	cGMP binding	GO:0030553	15	20212	1	1	-1	-1	1	1	-1	-1	1	1	-1	-1	1	1	95	1
GO:MF	heat shock protein binding	GO:0031072	130	20212	1	1	95	1	1	1	-1	-1	1	1	-1	-1	1	1	95	1
GO:MF	small GTPase binding	GO:0031267	285	20212	1	1	95	3	1	1	-1	-1	1	1	-1	-1	1	1	95	1
GO:MF	chromatin DNA binding	GO:0031490	122	20212	1	1	95	3	1	1	-1	-1	1	1	-1	-1	1	1	95	1
GO:MF	nucleosome binding	GO:0031491	70	20212	1	1	95	3	1	1	-1	-1	1	1	-1	-1	1	1	95	1
GO:MF	CCR1 chemokine receptor binding	GO:0031726	6	20212	1	1	-1	-1	1	1	-1	-1	1	1	-1	-1	1	1	95	1
GO:MF	histone H3K9 deacetylase activity	GO:0032129	3	20212	1	1	-1	-1	1	1	-1	-1	1	1	-1	-1	1	1	95	1
GO:MF	glutathione hydrolase activity	GO:0036374	7	20212	1	1	-1	-1	1	1	-1	-1	1	1	-1	-1	1	1	95	1
GO:MF	transition metal ion transmembrane transporter activity	GO:0046915	42	20212	1	1	95	1	1	1	-1	-1	1	1	-1	-1	1	1	95	1
GO:MF	1-phosphatidylinositol-3-kinase regulator activity	GO:0046935	16	20212	1	1	-1	-1	1	1	-1	-1	1	1	-1	-1	1	1	95	1
GO:MF	NAD-dependent histone H3K9 deacetylase activity	GO:0046969	2	20212	1	1	-1	-1	1	1	-1	-1	1	1	-1	-1	1	1	95	1
GO:MF	3',5'-cyclic-GMP phosphodiesterase activity	GO:0047555	16	20212	1	1	-1	-1	1	1	-1	-1	1	1	-1	-1	1	1	95	2
GO:MF	glucose 1-dehydrogenase (NAD+) activity	GO:0047934	1	20212	1	1	-1	-1	1	1	-1	-1	1	1	-1	-1	1	1	95	1
GO:MF	glucose 1-dehydrogenase (NADP+) activity	GO:0047935	1	20212	1	1	-1	-1	1	1	-1	-1	1	1	-1	-1	1	1	95	1
GO:MF	glucose 1-dehydrogenase [NAD(P)] activity	GO:0047936	1	20212	1	1	-1	-1	1	1	-1	-1	1	1	-1	-1	1	1	95	1
GO:MF	CCR chemokine receptor binding	GO:0048020	51	20212	1	1	-1	-1	1	1	93	1	1	1	-1	-1	1	1	95	1
GO:MF	tau protein binding	GO:0048156	43	20212	1	1	-1	-1	1	1	-1	-1	1	1	-1	-1	1	1	95	1
GO:MF	quinine 3-monooxygenase activity	GO:0050591	1	20212	1	1	-1	-1	1	1	-1	-1	1	1	-1	-1	1	1	95	1
GO:MF	testosterone 6-beta-hydroxylase activity	GO:0050649	4	20212	1	1	-1	-1	1	1	-1	-1	1	1	-1	-1	1	1	95	1
GO:MF	nitric-oxide synthase binding	GO:0050998	11	20212	1	1	-1	-1	1	1	93	1	1	1	-1	-1	1	1	95	1
GO:MF	microtubule plus-end binding	GO:0051010	21	20212	1	1	95	1	1	1	-1	-1	1	1	-1	-1	1	1	95	1
GO:MF	GTPase binding	GO:0051020	317	20212	1	1	95	3	1	1	-1	-1	1	1	-1	-1	1	1	95	1
GO:MF	unfolded protein binding	GO:0051082	113	20212	1	1	-1	-1	1	1	-1	-1	1	1	-1	-1	1	1	95	1
GO:MF	dioxygenase activity	GO:0051213	95	20212	1	1	95	1	1	1	93	1	1	1	-1	-1	1	1	95	1
GO:MF	phosphoric ester hydrolase activity	GO:0042578	372	20212	1	1	95	4	1	1	-1	-1	1	1	-1	-1	1	1	95	5
GO:MF	T cell receptor binding	GO:0042608	11	20212	1	1	-1	-1	1	1	-1	-1	1	1	-1	-1	1	1	95	1
GO:MF	neuropeptide binding	GO:0042923	32	20212	1	1	-1	-1	1	1	93	2	1	1	-1	-1	1	1	95	1
GO:MF	ribonucleoprotein complex binding	GO:0043021	172	20212	1	1	95	2	1	1	-1	-1	1	1	-1	-1	1	1	95	1
GO:MF	ADP binding	GO:0043531	37	20212	1	1	95	1	1	1	-1	-1	1	1	-1	-1	1	1	95	1
GO:MF	cytidine kinase activity	GO:0043771	4	20212	1	1	-1	-1	1	1	-1	-1	1	1	-1	-1	1	1	95	1
GO:MF	ubiquitin-like protein conjugating enzyme binding	GO:0044390	37	20212	1	1	95	2	1	1	-1	-1	1	1	-1	-1	1	1	95	1
GO:MF	inositol trisphosphate phosphatase activity	GO:0046030	13	20212	1	1	-1	-1	1	1	-1	-1	1	1	-1	-1	1	1	95	1
GO:MF	SMAD binding	GO:0046332	78	20212	1	1	95	1	1	1	93	1	1	1	-1	-1	1	1	95	1
GO:MF	MDM2/MDM4 family protein binding	GO:0097371	12	20212	1	1	95	1	1	1	-1	-1	1	1	-1	-1	1	1	-1	-1
GO:MF	deubiquitinase activity	GO:0101005	123	20212	1	1	95	2	1	1	-1	-1	1	1	-1	-1	1	1	-1	-1
GO:MF	heparan sulfate N-deacetylase activity	GO:0102140	3	20212	1	1	95	1	1	1	-1	-1	1	1	-1	-1	1	1	-1	-1
GO:MF	P-TEFb complex binding	GO:0106140	4	20212	1	1	95	1	1	1	-1	-1	1	1	-1	-1	1	1	-1	-1
GO:MF	ceramide-1-phosphate phosphatase activity	GO:0106235	3	20212	1	1	95	1	1	1	-1	-1	1	1	-1	-1	1	1	-1	-1
GO:MF	biliberdin reductase NAD+ activity	GO:0106276	2	20212	1	1	95	1	1	1	-1	-1	1	1	-1	-1	1	1	-1	-1
GO:MF	biliverdin reductase (NADP+) activity	GO:0106277	2	20212	1	1	95	1	1	1	-1	-1	1	1	-1	-1	1	1	-1	-1
GO:MF	acetylation-dependent protein binding	GO:0140033	25	20212	1	1	95	1	1	1	-1	-1	1	1	-1	-1	1	1	-1	-1
GO:MF	molecular carrier activity	GO:0140104	96	20212	1	1	95	1	1	1	-1	-1	1	1	-1	-1	1	1	-1	-1
GO:MF	nucleocytoplasmic carrier activity	GO:0140142	32	20212	1	1	95	1	1	1	-1	-1	1	1	-1	-1	1	1	-1	-1
GO:MF	general transcription initiation factor activity	GO:0140223	52	20212	1	1	95	1	1	1	-1	-1	1	1	-1	-1	1	1	-1	-1
GO:MF	carboxylesterase activity	GO:0106435	6	20212	1	1	95	1	1	1	-1	-1	1	1	-1	-1	1	1	-1	-1
GO:MF	oleoyl-CoA ligase activity	GO:0090434	4	20212	1	1	95	1	1	1	-1	-1	1	1	-1	-1	1	1	-1	-1
GO:MF	protein phosphatase activator activity	GO:0072542	16	20212	1	1	95	1	1	1	-1	-1	1	1	-1	-1	1	1	-1	-1
GO:MF	K63-linked deubiquitinase activity	GO:0061578	15	20212	1	1	95	1	1	1	-1	-1	1	1	-1	-1	1	1	-1	-1
GO:MF	H3K27me3 modified histone binding	GO:0061628	4	20212	1	1	95	1	1	1	-1	-1	1	1	-1	-1	1	1	-1	-1
GO:MF	peptide-lysine-N-acetyltransferase activity	GO:0061733	48	20212	1	1	95	1	1	1	-1	-1	1	1	-1	-1	1	1	-1	-1
GO:MF	regulatory RNA binding	GO:0061980	49	20212	1	1	95	1	1	1	-1	-1	1	1	-1	-1	1	1	-1	-1
GO:MF	chromo shadow domain binding	GO:0070087	6	20212	1	1	95	1	1	1	-1	-1	1	1	-1	-1	1	1	-1	-1
GO:MF	delta-catenin binding	GO:0070097	10	20212	1	1	95	1	1	1	-1	-1	1	1	-1	-1	1	1	-1	-1
GO:MF	DNA polymerase binding	GO:0070182	21	20212	1	1	95	2	1	1	-1	-1	1	1	-1	-1	1	1	-1	-1
GO:MF	pristanate-CoA ligase activity	GO:0070251	2	20212	1	1	95	1	1	1	-1	-1	1	1	-1	-1	1	1	-1	-1
GO:MF	NADPH binding	GO:0070402	15	20212	1	1	95	1	1	1	-1	-1	1	1	-1	-1	1	1	-1	-1
GO:MF	co-SMAD binding	GO:0070410	12	20212	1	1	95	1	1	1	93	1	1	1	-1	-1	1	1	-1	-1
GO:MF	lysine-acetylated histone binding	GO:0070577	25	20212	1	1	95	1	1	1	-1	-1	1	1	-1	-1	1	1	-1	-1
GO:MF	poly-purine tract binding	GO:0070717	33	20212	1	1	95	1	1	1	-1	-1	1	1	-1	-1	1	1	-1	-1
GO:MF	peptidyl-lysine 5-dioxygenase activity	GO:0070815	4	20212	1	1	95	1	1	1	-1	-1	1	1	-1	-1	1	1	-1	-1
GO:MF	primary miRNA binding	GO:0070878	9	20212	1	1	95	1	1	1	-1	-1	1	1	-1	-1	1	1	-1	-1
GO:MF	pre-miRNA binding	GO:0070883	9	20212	1	1	95	1	1	1	-1	-1	1	1	-1	-1	1	1	-1	-1
GO:MF	snRNP binding	GO:0070990	8	20212	1	1	95	1	1	1	-1	-1	1	1	-1	-1	1	1	-1	-1
GO:MF	lysophospholipid acyltransferase activity	GO:0071617	22	20212	1	1	95	1	1	1	-1	-1	1	1	-1	-1	1	1	-1	-1
GO:MF	exogenous protein binding	GO:0140272	80	20212	1	1	95	1	1	1	-1	-1	1	1	-1	-1	1	1	-1	-1
GO:MF	ubiquitin ligase inhibitor activity	GO:1990948	9	20212	1	1	95	1	1	1	-1	-1	1	1	-1	-1	1	1	-1	-1
GO:MF	U2 snRNP binding	GO:1990447	2	20212	1	1	95	1	1	1	-1	-1	1	1	-1	-1	1	1	-1	-1
GO:MF	protein-RNA adaptor activity	GO:0140517	18	20212	1	1	95	1	1	1	-1	-1	1	1	-1	-1	1	1	-1	-1
GO:MF	RNA sequestering activity	GO:0140610	2	20212	1	1	95	1	1	1	-1	-1	1	1	-1	-1	1	1	-1	-1
GO:MF	P-type manganese transporter activity	GO:0140613	2	20212	1	1	95	1	1	1	-1	-1	1	1	-1	-1	1	1	-1	-1
GO:MF	ATP-dependent chromatin remodeler activity	GO:0140658	38	20212	1	1	95	1	1	1	-1	-1	1	1	-1	-1	1	1	-1	-1
GO:MF	thioredoxin-dependent peroxiredoxin activity	GO:0140824	6	20212	1	1	95	1	1	1	-1	-1	1	1	-1	-1	1	1	-1	-1
GO:MF	histone H3 methyltransferase activity	GO:0140938	42	20212	1	1	95	1	1	1	-1	-1	1	1	-1	-1	1	1	-1	-1
GO:MF	histone H3K9me2 methyltransferase activity	GO:0140947	7	20212	1	1	95	1	1	1	-1	-1	1	1	-1	-1	1	1	-1	-1
GO:MF	histone H3K9 monomethyltransferase activity	GO:0140948	6	20212	1	1	95	1	1	1	-1	-1	1	1	-1	-1	1	1	-1	-1
GO:MF	histone H3K9 trimethyltransferase activity	GO:0140949	5	20212	1	1	95	1	1	1	-1	-1	1	1	-1	-1	1	1	-1	-1
GO:MF	Atg8-family conjugating enzyme activity	GO:0141046	1	20212	1	1	95	1	1	1	-1	-1	1	1	-1	-1	1	1	-1	-1
GO:MF	protein decrotonylase activity	GO:0160008	5	20212	1	1	95	1	1	1	-1	-1	1	1	-1	-1	1	1	-1	-1
GO:MF	histone decrotonylase activity	GO:0160009	5	20212	1	1	95	1	1	1	-1	-1	1	1	-1	-1	1	1	-1	-1
GO:MF	protein de-2-hydroxyisobutyrylase activity	GO:0160010	2	20212	1	1	95	1	1	1	-1	-1	1	1	-1	-1	1	1	-1	-1
GO:MF	K11-linked deubiquitinase activity	GO:0180017	1	20212	1	1	95	1	1	1	-1	-1	1	1	-1	-1	1	1	-1	-1
GO:MF	sulfur compound transmembrane transporter activity	GO:1901682	59	20212	1	1	95	1	1	1	93	2	1	1	-1	-1	1	1	-1	-1
GO:MF	phosphatidylinositol phosphate binding	GO:1901981	180	20212	1	1	95	1	1	1	93	1	1	1	-1	-1	1	1	-1	-1
GO:MF	IDP phosphatase activity	GO:1990003	3	20212	1	1	95	1	1	1	-1	-1	1	1	-1	-1	1	1	-1	-1
GO:MF	steroid hormone binding	GO:1990239	6	20212	1	1	95	1	1	1	-1	-1	1	1	-1	-1	1	1	-1	-1
GO:MF	K48-linked deubiquitinase activity	GO:1990380	20	20212	1	1	95	2	1	1	-1	-1	1	1	-1	-1	1	1	-1	-1
GO:MF	cytoskeletal anchor activity	GO:0008093	24	20212	1	1	95	1	1	1	-1	-1	1	1	-1	-1	1	1	-1	-1
GO:MF	alcohol dehydrogenase (NADP+) activity	GO:0008106	23	20212	1	1	95	1	1	1	-1	-1	1	1	-1	-1	1	1	-1	-1
GO:MF	protein tyrosine/serine/threonine phosphatase activity	GO:0008138	47	20212	1	1	95	1	1	1	-1	-1	1	1	-1	-1	1	1	-1	-1
GO:MF	poly(A) binding	GO:0008143	28	20212	1	1	95	1	1	1	-1	-1	1	1	-1	-1	1	1	-1	-1
GO:MF	sulfotransferase activity	GO:0008146	56	20212	1	1	95	1	1	1	93	2	1	1	-1	-1	1	1	-1	-1
GO:MF	N-methyltransferase activity	GO:0008170	96	20212	1	1	95	1	1	1	-1	-1	1	1	-1	-1	1	1	-1	-1
GO:MF	N-acetyltransferase activity	GO:0008080	68	20212	1	1	95	1	1	1	-1	-1	1	1	-1	-1	1	1	-1	-1
GO:MF	metalloendopeptidase inhibitor activity	GO:0008191	16	20212	1	1	95	1	1	1	-1	-1	1	1	-1	-1	1	1	-1	-1
GO:MF	phosphatidate phosphatase activity	GO:0008195	14	20212	1	1	95	1	1	1	-1	-1	1	1	-1	-1	1	1	-1	-1
GO:MF	cysteine-type peptidase activity	GO:0008234	198	20212	1	1	95	2	1	1	-1	-1	1	1	-1	-1	1	1	-1	-1
GO:MF	protein methyltransferase activity	GO:0008276	96	20212	1	1	95	1	1	1	-1	-1	1	1	-1	-1	1	1	-1	-1
GO:MF	protein tyrosine/threonine phosphatase activity	GO:0008330	10	20212	1	1	95	1	1	1	-1	-1	1	1	-1	-1	1	1	-1	-1
GO:MF	acetylglucosaminyltransferase activity	GO:0008375	45	20212	1	1	95	1	1	1	-1	-1	1	1	-1	-1	1	1	-1	-1
GO:MF	galactosyltransferase activity	GO:0008378	30	20212	1	1	95	1	1	1	-1	-1	1	1	-1	-1	1	1	-1	-1
GO:MF	inward rectifier potassium channel activity	GO:0005242	27	20212	1	1	95	1	1	1	-1	-1	1	1	-1	-1	1	1	-1	-1
GO:MF	monocarboxylic acid transmembrane transporter activity	GO:0008028	61	20212	1	1	95	1	1	1	93	1	1	1	-1	-1	1	1	-1	-1
GO:MF	taurine transmembrane transporter activity	GO:0005368	5	20212	1	1	95	1	1	1	-1	-1	1	1	-1	-1	1	1	-1	-1
GO:MF	manganese ion transmembrane transporter activity	GO:0005384	9	20212	1	1	95	1	1	1	-1	-1	1	1	-1	-1	1	1	-1	-1
GO:MF	organic acid transmembrane transporter activity	GO:0005342	179	20212	1	1	95	1	1	1	93	4	1	1	-1	-1	1	1	-1	-1
GO:MF	thioredoxin peroxidase activity	GO:0008379	6	20212	1	1	95	1	1	1	-1	-1	1	1	-1	-1	1	1	-1	-1
GO:MF	3'-5' exonuclease activity	GO:0008408	57	20212	1	1	95	1	1	1	-1	-1	1	1	-1	-1	1	1	-1	-1
GO:MF	procollagen-lysine 5-dioxygenase activity	GO:0008475	3	20212	1	1	95	1	1	1	-1	-1	1	1	-1	-1	1	1	-1	-1
GO:MF	protein-lysine N-methyltransferase activity	GO:0016279	61	20212	1	1	95	1	1	1	-1	-1	1	1	-1	-1	1	1	-1	-1
GO:MF	CoA-ligase activity	GO:0016405	28	20212	1	1	95	1	1	1	93	1	1	1	-1	-1	1	1	-1	-1
GO:MF	acetyltransferase activity	GO:0016407	95	20212	1	1	95	1	1	1	-1	-1	1	1	-1	-1	1	1	-1	-1
GO:MF	C-acyltransferase activity	GO:0016408	20	20212	1	1	95	1	1	1	-1	-1	1	1	-1	-1	1	1	-1	-1
GO:MF	palmitoyltransferase activity	GO:0016409	37	20212	1	1	95	1	1	1	-1	-1	1	1	-1	-1	1	1	-1	-1
GO:MF	N-acyltransferase activity	GO:0016410	94	20212	1	1	95	1	1	1	-1	-1	1	1	-1	-1	1	1	-1	-1
GO:MF	C-palmitoyltransferase activity	GO:0016454	5	20212	1	1	95	1	1	1	-1	-1	1	1	-1	-1	1	1	-1	-1
GO:MF	lysine N-methyltransferase activity	GO:0016278	62	20212	1	1	95	1	1	1	-1	-1	1	1	-1	-1	1	1	-1	-1
GO:MF	oxidoreductase activity, acting on other nitrogenous compounds as donors	GO:0016661	10	20212	1	1	95	1	1	1	-1	-1	1	1	-1	-1	1	1	-1	-1
GO:MF	oxidoreductase activity, acting on other nitrogenous compounds as donors, oxygen as acceptor	GO:0016663	1	20212	1	1	95	1	1	1	-1	-1	1	1	-1	-1	1	1	-1	-1
GO:MF	oxidoreductase activity, acting on peroxide as acceptor	GO:0016684	56	20212	1	1	95	1	1	1	-1	-1	1	1	-1	-1	1	1	-1	-1
GO:MF	RNA polymerase II general transcription initiation factor activity	GO:0016251	40	20212	1	1	95	1	1	1	-1	-1	1	1	-1	-1	1	1	-1	-1
GO:MF	antioxidant activity	GO:0016209	82	20212	1	1	95	1	1	1	-1	-1	1	1	-1	-1	1	1	-1	-1
GO:MF	AMP binding	GO:0016208	15	20212	1	1	95	1	1	1	-1	-1	1	1	-1	-1	1	1	-1	-1
GO:MF	N-acetyllactosaminide beta-1,3-N-acetylglucosaminyltransferase activity	GO:0008532	5	20212	1	1	95	1	1	1	-1	-1	1	1	-1	-1	1	1	-1	-1
GO:MF	cAMP-dependent protein kinase regulator activity	GO:0008603	12	20212	1	1	95	1	1	1	-1	-1	1	1	-1	-1	1	1	-1	-1
GO:MF	S-adenosylmethionine-dependent methyltransferase activity	GO:0008757	198	20212	1	1	95	1	1	1	-1	-1	1	1	-1	-1	1	1	-1	-1
GO:MF	guanosine-5'-triphosphate,3'-diphosphate diphosphatase activity	GO:0008894	1	20212	1	1	95	1	1	1	-1	-1	1	1	-1	-1	1	1	-1	-1
GO:MF	phenylacetaldehyde dehydrogenase activity	GO:0008957	1	20212	1	1	95	1	1	1	-1	-1	1	1	-1	-1	1	1	-1	-1
GO:MF	double-stranded methylated DNA binding	GO:0010385	6	20212	1	1	95	1	1	1	-1	-1	1	1	-1	-1	1	1	-1	-1
GO:MF	histone H4 acetyltransferase activity	GO:0010485	22	20212	1	1	95	1	1	1	-1	-1	1	1	-1	-1	1	1	-1	-1
GO:MF	[heparan sulfate]-glucosamine N-sulfotransferase activity	GO:0015016	5	20212	1	1	95	1	1	1	-1	-1	1	1	-1	-1	1	1	-1	-1
GO:MF	glucuronosyltransferase activity	GO:0015020	34	20212	1	1	95	1	1	1	93	1	1	1	-1	-1	1	1	-1	-1
GO:MF	fatty acid ligase activity	GO:0015645	26	20212	1	1	95	1	1	1	93	1	1	1	-1	-1	1	1	-1	-1
GO:MF	GDP-dissociation inhibitor activity	GO:0005092	16	20212	1	1	95	1	1	1	-1	-1	1	1	-1	-1	1	1	-1	-1
GO:MF	p53 binding	GO:0002039	69	20212	1	1	95	2	1	1	-1	-1	1	1	-1	-1	1	1	-1	-1
GO:MF	microtubule motor activity	GO:0003777	68	20212	1	1	95	1	1	1	93	2	1	1	-1	-1	1	1	-1	-1
GO:MF	actin monomer binding	GO:0003785	29	20212	1	1	95	1	1	1	-1	-1	1	1	-1	-1	1	1	-1	-1
GO:MF	CTP synthase activity	GO:0003883	2	20212	1	1	95	1	1	1	-1	-1	1	1	-1	-1	1	1	-1	-1
GO:MF	DNA ligase activity	GO:0003909	3	20212	1	1	95	1	1	1	-1	-1	1	1	-1	-1	1	1	-1	-1
GO:MF	DNA ligase (ATP) activity	GO:0003910	3	20212	1	1	95	1	1	1	-1	-1	1	1	-1	-1	1	1	-1	-1
GO:MF	G protein activity	GO:0003925	44	20212	1	1	95	1	1	1	-1	-1	1	1	-1	-1	1	1	-1	-1
GO:MF	virus receptor activity	GO:0001618	79	20212	1	1	95	1	1	1	-1	-1	1	1	-1	-1	1	1	-1	-1
GO:MF	3'-5'-RNA exonuclease activity	GO:0000175	36	20212	1	1	95	1	1	1	-1	-1	1	1	-1	-1	1	1	-1	-1
GO:MF	bubble DNA binding	GO:0000405	8	20212	1	1	95	1	1	1	-1	-1	1	1	-1	-1	1	1	-1	-1
GO:MF	mismatch base pair DNA N-glycosylase activity	GO:0000700	5	20212	1	1	95	1	1	1	-1	-1	1	1	-1	-1	1	1	-1	-1
GO:MF	purine-specific mismatch base pair DNA N-glycosylase activity	GO:0000701	3	20212	1	1	95	1	1	1	-1	-1	1	1	-1	-1	1	1	-1	-1
GO:MF	adenyl-nucleotide exchange factor activity	GO:0000774	15	20212	1	1	95	1	1	1	-1	-1	1	1	-1	-1	1	1	-1	-1
GO:MF	diacylglycerol diphosphate phosphatase activity	GO:0000810	3	20212	1	1	95	1	1	1	-1	-1	1	1	-1	-1	1	1	-1	-1
GO:MF	core promoter sequence-specific DNA binding	GO:0001046	41	20212	1	1	95	1	1	1	-1	-1	1	1	-1	-1	1	1	-1	-1
GO:MF	RNA polymerase II general transcription initiation factor binding	GO:0001091	25	20212	1	1	95	1	1	1	-1	-1	1	1	-1	-1	1	1	-1	-1
GO:MF	TFIIH-class transcription factor complex binding	GO:0001097	3	20212	1	1	95	1	1	1	-1	-1	1	1	-1	-1	1	1	-1	-1
GO:MF	RNA polymerase I transcription regulatory region sequence-specific DNA binding	GO:0001163	8	20212	1	1	95	1	1	1	-1	-1	1	1	-1	-1	1	1	-1	-1
GO:MF	RNA polymerase I core promoter sequence-specific DNA binding	GO:0001164	8	20212	1	1	95	1	1	1	-1	-1	1	1	-1	-1	1	1	-1	-1
GO:MF	transcription coregulator binding	GO:0001221	118	20212	1	1	95	1	1	1	93	2	1	1	-1	-1	1	1	-1	-1
GO:MF	aldo-keto reductase (NADP) activity	GO:0004033	30	20212	1	1	95	1	1	1	-1	-1	1	1	-1	-1	1	1	-1	-1
GO:MF	lysophospholipase activity	GO:0004622	24	20212	1	1	95	1	1	1	-1	-1	1	1	-1	-1	1	1	-1	-1
GO:MF	diacylglycerol-dependent, calcium-independent serine/threonine kinase activity	GO:0004699	3	20212	1	1	95	1	1	1	-1	-1	1	1	-1	-1	1	1	-1	-1
GO:MF	protein serine/threonine phosphatase activity	GO:0004722	106	20212	1	1	95	1	1	1	-1	-1	1	1	-1	-1	1	1	-1	-1
GO:MF	ribose-5-phosphate isomerase activity	GO:0004751	1	20212	1	1	95	1	1	1	-1	-1	1	1	-1	-1	1	1	-1	-1
GO:MF	serine C-palmitoyltransferase activity	GO:0004758	5	20212	1	1	95	1	1	1	-1	-1	1	1	-1	-1	1	1	-1	-1
GO:MF	cysteine-type deubiquitinase activity	GO:0004843	117	20212	1	1	95	2	1	1	-1	-1	1	1	-1	-1	1	1	-1	-1
GO:MF	cysteine-type endopeptidase inhibitor activity	GO:0004869	35	20212	1	1	95	1	1	1	93	1	1	1	-1	-1	1	1	-1	-1
GO:MF	nuclear export signal receptor activity	GO:0005049	12	20212	1	1	95	1	1	1	-1	-1	1	1	-1	-1	1	1	-1	-1
GO:MF	protein kinase C binding	GO:0005080	52	20212	1	1	95	1	1	1	-1	-1	1	1	-1	-1	1	1	-1	-1
GO:MF	sterol esterase activity	GO:0004771	7	20212	1	1	95	1	1	1	-1	-1	1	1	-1	-1	1	1	-1	-1
GO:MF	peroxidase activity	GO:0004601	54	20212	1	1	95	1	1	1	-1	-1	1	1	-1	-1	1	1	-1	-1
GO:MF	tRNA-specific ribonuclease activity	GO:0004549	18	20212	1	1	95	1	1	1	-1	-1	1	1	-1	-1	1	1	-1	-1
GO:MF	RNA nuclease activity	GO:0004540	126	20212	1	1	95	2	1	1	-1	-1	1	1	-1	-1	1	1	-1	-1
GO:MF	biliverdin reductase (NAD(P)+) activity	GO:0004074	2	20212	1	1	95	1	1	1	-1	-1	1	1	-1	-1	1	1	-1	-1
GO:MF	ATP-dependent peptidase activity	GO:0004176	7	20212	1	1	95	1	1	1	-1	-1	1	1	-1	-1	1	1	-1	-1
GO:MF	cysteine-type endopeptidase activity	GO:0004197	87	20212	1	1	95	2	1	1	-1	-1	1	1	-1	-1	1	1	-1	-1
GO:MF	epoxide hydrolase activity	GO:0004301	6	20212	1	1	95	1	1	1	-1	-1	1	1	-1	-1	1	1	-1	-1
GO:MF	GDP phosphatase activity	GO:0004382	10	20212	1	1	95	1	1	1	-1	-1	1	1	-1	-1	1	1	-1	-1
GO:MF	histone acetyltransferase activity	GO:0004402	44	20212	1	1	95	1	1	1	-1	-1	1	1	-1	-1	1	1	-1	-1
GO:MF	isocitrate dehydrogenase [NAD(P)+] activity	GO:0004448	5	20212	1	1	95	1	1	1	-1	-1	1	1	-1	-1	1	1	-1	-1
GO:MF	isocitrate dehydrogenase (NAD+) activity	GO:0004449	3	20212	1	1	95	1	1	1	-1	-1	1	1	-1	-1	1	1	-1	-1
GO:MF	long-chain fatty acid-CoA ligase activity	GO:0004467	16	20212	1	1	95	1	1	1	93	1	1	1	-1	-1	1	1	-1	-1
GO:MF	nicotinate-nucleotide adenylyltransferase activity	GO:0004515	4	20212	1	1	95	1	1	1	-1	-1	1	1	-1	-1	1	1	-1	-1
GO:MF	RNA endonuclease activity	GO:0004521	76	20212	1	1	95	1	1	1	-1	-1	1	1	-1	-1	1	1	-1	-1
GO:MF	ribonuclease P activity	GO:0004526	14	20212	1	1	95	1	1	1	-1	-1	1	1	-1	-1	1	1	-1	-1
GO:MF	exonuclease activity	GO:0004527	83	20212	1	1	95	1	1	1	-1	-1	1	1	-1	-1	1	1	-1	-1
GO:MF	RNA exonuclease activity	GO:0004532	42	20212	1	1	95	1	1	1	-1	-1	1	1	-1	-1	1	1	-1	-1
GO:MF	poly(A)-specific ribonuclease activity	GO:0004535	13	20212	1	1	95	1	1	1	-1	-1	1	1	-1	-1	1	1	-1	-1
GO:MF	alditol:NADP+ 1-oxidoreductase activity	GO:0004032	12	20212	1	1	95	1	1	1	-1	-1	1	1	-1	-1	1	1	-1	-1
GO:MF	ATPase regulator activity	GO:0060590	48	20212	1	1	95	1	1	1	-1	-1	1	1	-1	-1	1	1	-1	-1
GO:MF	G protein-coupled estrogen receptor activity	GO:0038054	2	20212	1	1	95	1	1	1	-1	-1	1	1	-1	-1	1	1	-1	-1
GO:MF	neuropilin binding	GO:0038191	5	20212	1	1	95	1	1	1	-1	-1	1	1	-1	-1	1	1	-1	-1
GO:MF	histone methyltransferase activity	GO:0042054	66	20212	1	1	95	1	1	1	-1	-1	1	1	-1	-1	1	1	-1	-1
GO:MF	SH2 domain binding	GO:0042169	41	20212	1	1	95	2	1	1	-1	-1	1	1	-1	-1	1	1	-1	-1
GO:MF	lysophosphatidic acid acyltransferase activity	GO:0042171	22	20212	1	1	95	1	1	1	-1	-1	1	1	-1	-1	1	1	-1	-1
GO:MF	sphingosine-1-phosphate phosphatase activity	GO:0042392	7	20212	1	1	95	1	1	1	-1	-1	1	1	-1	-1	1	1	-1	-1
GO:MF	lipid phosphatase activity	GO:0042577	19	20212	1	1	95	1	1	1	-1	-1	1	1	-1	-1	1	1	-1	-1
GO:MF	nuclear vitamin D receptor binding	GO:0042809	15	20212	1	1	95	1	1	1	-1	-1	1	1	-1	-1	1	1	-1	-1
GO:MF	alkanesulfonate transmembrane transporter activity	GO:0042959	5	20212	1	1	95	1	1	1	-1	-1	1	1	-1	-1	1	1	-1	-1
GO:MF	X11-like protein binding	GO:0042988	3	20212	1	1	95	1	1	1	-1	-1	1	1	-1	-1	1	1	-1	-1
GO:MF	gamma-tubulin binding	GO:0043015	33	20212	1	1	95	1	1	1	-1	-1	1	1	-1	-1	1	1	-1	-1
GO:MF	protein kinase B binding	GO:0043422	10	20212	1	1	95	1	1	1	-1	-1	1	1	-1	-1	1	1	-1	-1
GO:MF	CDP phosphatase activity	GO:0036384	3	20212	1	1	95	1	1	1	-1	-1	1	1	-1	-1	1	1	-1	-1
GO:MF	mismatch repair complex binding	GO:0032404	11	20212	1	1	95	1	1	1	-1	-1	1	1	-1	-1	1	1	-1	-1
GO:MF	MutLalpha complex binding	GO:0032405	6	20212	1	1	95	1	1	1	-1	-1	1	1	-1	-1	1	1	-1	-1
GO:MF	ribonuclease P RNA binding	GO:0033204	10	20212	1	1	95	1	1	1	-1	-1	1	1	-1	-1	1	1	-1	-1
GO:MF	MAP kinase phosphatase activity	GO:0033549	18	20212	1	1	95	1	1	1	-1	-1	1	1	-1	-1	1	1	-1	-1
GO:MF	MAP kinase tyrosine phosphatase activity	GO:0033550	10	20212	1	1	95	1	1	1	-1	-1	1	1	-1	-1	1	1	-1	-1
GO:MF	procollagen glucosyltransferase activity	GO:0033823	1	20212	1	1	95	1	1	1	-1	-1	1	1	-1	-1	1	1	-1	-1
GO:MF	peptide N-acetyltransferase activity	GO:0034212	53	20212	1	1	95	1	1	1	-1	-1	1	1	-1	-1	1	1	-1	-1
GO:MF	dynactin binding	GO:0034452	12	20212	1	1	95	1	1	1	-1	-1	1	1	-1	-1	1	1	-1	-1
GO:MF	heparan sulfate sulfotransferase activity	GO:0034483	16	20212	1	1	95	1	1	1	-1	-1	1	1	-1	-1	1	1	-1	-1
GO:MF	type I transforming growth factor beta receptor binding	GO:0034713	10	20212	1	1	95	1	1	1	-1	-1	1	1	-1	-1	1	1	-1	-1
GO:MF	phosphatidylinositol binding	GO:0035091	277	20212	1	1	95	2	1	1	93	1	1	1	-1	-1	1	1	-1	-1
GO:MF	miRNA binding	GO:0035198	37	20212	1	1	95	1	1	1	-1	-1	1	1	-1	-1	1	1	-1	-1
GO:MF	UDP-galactosyltransferase activity	GO:0035250	27	20212	1	1	95	1	1	1	-1	-1	1	1	-1	-1	1	1	-1	-1
GO:MF	selenocysteine insertion sequence binding	GO:0035368	4	20212	1	1	95	1	1	1	-1	-1	1	1	-1	-1	1	1	-1	-1
GO:MF	RNA stem-loop binding	GO:0035613	16	20212	1	1	95	1	1	1	-1	-1	1	1	-1	-1	1	1	-1	-1
GO:MF	protein serine/threonine kinase activator activity	GO:0043539	60	20212	1	1	95	1	1	1	-1	-1	1	1	-1	-1	1	1	-1	-1
GO:MF	insulin receptor substrate binding	GO:0043560	13	20212	1	1	95	1	1	1	-1	-1	1	1	-1	-1	1	1	-1	-1
GO:MF	N-acetylglucosamine deacetylase activity	GO:0050119	3	20212	1	1	95	1	1	1	-1	-1	1	1	-1	-1	1	1	-1	-1
GO:MF	phytanate-CoA ligase activity	GO:0050197	2	20212	1	1	95	1	1	1	-1	-1	1	1	-1	-1	1	1	-1	-1
GO:MF	procollagen galactosyltransferase activity	GO:0050211	3	20212	1	1	95	1	1	1	-1	-1	1	1	-1	-1	1	1	-1	-1
GO:MF	delta14-sterol reductase activity	GO:0050613	2	20212	1	1	95	1	1	1	-1	-1	1	1	-1	-1	1	1	-1	-1
GO:MF	nuclear androgen receptor binding	GO:0050681	27	20212	1	1	95	2	1	1	93	1	1	1	-1	-1	1	1	-1	-1
GO:MF	mitogen-activated protein kinase binding	GO:0051019	28	20212	1	1	95	2	1	1	-1	-1	1	1	-1	-1	1	1	-1	-1
GO:MF	arachidonate-CoA ligase activity	GO:0047676	11	20212	1	1	95	1	1	1	-1	-1	1	1	-1	-1	1	1	-1	-1
GO:MF	protein phosphatase 2A binding	GO:0051721	29	20212	1	1	95	1	1	1	-1	-1	1	1	-1	-1	1	1	-1	-1
GO:MF	peroxiredoxin activity	GO:0051920	8	20212	1	1	95	1	1	1	-1	-1	1	1	-1	-1	1	1	-1	-1
GO:MF	ubiquitin-protein transferase inhibitor activity	GO:0055105	12	20212	1	1	95	1	1	1	-1	-1	1	1	-1	-1	1	1	-1	-1
GO:MF	ubiquitin-protein transferase regulator activity	GO:0055106	29	20212	1	1	95	1	1	1	-1	-1	1	1	-1	-1	1	1	-1	-1
GO:MF	NF-kappaB binding	GO:0051059	30	20212	1	1	95	1	1	1	-1	-1	1	1	-1	-1	1	1	-1	-1
GO:MF	histone H3K9 methyltransferase activity	GO:0046974	13	20212	1	1	95	1	1	1	-1	-1	1	1	-1	-1	1	1	-1	-1
GO:MF	protein self-association	GO:0043621	69	20212	1	1	95	1	1	1	93	1	1	1	-1	-1	1	1	-1	-1
GO:MF	2,3-diketo-5-methylthiopentyl-1-phosphate enolase activity	GO:0043715	1	20212	1	1	95	1	1	1	-1	-1	1	1	-1	-1	1	1	-1	-1
GO:MF	2-hydroxy-3-keto-5-methylthiopentenyl-1-phosphate phosphatase activity	GO:0043716	1	20212	1	1	95	1	1	1	-1	-1	1	1	-1	-1	1	1	-1	-1
GO:MF	acireductone synthase activity	GO:0043874	1	20212	1	1	95	1	1	1	-1	-1	1	1	-1	-1	1	1	-1	-1
GO:MF	histone H4K12 acetyltransferase activity	GO:0043997	12	20212	1	1	95	1	1	1	-1	-1	1	1	-1	-1	1	1	-1	-1
GO:MF	DNA topoisomerase binding	GO:0044547	4	20212	1	1	95	1	1	1	-1	-1	1	1	-1	-1	1	1	-1	-1
GO:MF	hemi-methylated DNA-binding	GO:0044729	3	20212	1	1	95	1	1	1	-1	-1	1	1	-1	-1	1	1	-1	-1
GO:MF	UDP phosphatase activity	GO:0045134	9	20212	1	1	95	1	1	1	-1	-1	1	1	-1	-1	1	1	-1	-1
GO:MF	dynein intermediate chain binding	GO:0045505	37	20212	1	1	95	1	1	1	93	2	1	1	-1	-1	1	1	-1	-1
GO:MF	glucosyltransferase activity	GO:0046527	19	20212	1	1	95	1	1	1	-1	-1	1	1	-1	-1	1	1	-1	-1
GO:MF	ephrin receptor binding	GO:0046875	28	20212	1	1	95	2	1	1	-1	-1	1	1	-1	-1	1	1	-1	-1
GO:MF	carboxylic acid transmembrane transporter activity	GO:0046943	178	20212	1	1	95	1	1	1	93	4	1	1	-1	-1	1	1	-1	-1
GO:MF	nuclear thyroid hormone receptor binding	GO:0046966	28	20212	1	1	95	1	1	1	-1	-1	1	1	-1	-1	1	1	-1	-1
GO:MF	phosphatidylinositol-3-phosphate binding	GO:0032266	46	20212	1	1	95	1	1	1	-1	-1	1	1	-1	-1	1	1	-1	-1
GO:MF	dinucleotide insertion or deletion binding	GO:0032139	3	20212	1	1	95	1	1	1	-1	-1	1	1	-1	-1	1	1	-1	-1
GO:MF	DNA insertion or deletion binding	GO:0032135	6	20212	1	1	95	1	1	1	-1	-1	1	1	-1	-1	1	1	-1	-1
GO:MF	clathrin heavy chain binding	GO:0032050	10	20212	1	1	95	1	1	1	-1	-1	1	1	-1	-1	1	1	-1	-1
GO:MF	RNA endonuclease activity, producing 5'-phosphomonoesters	GO:0016891	34	20212	1	1	95	1	1	1	-1	-1	1	1	-1	-1	1	1	-1	-1
GO:MF	endonuclease activity, active with either ribo- or deoxyribonucleic acids and producing 5'-phosphomonoesters	GO:0016893	43	20212	1	1	95	1	1	1	-1	-1	1	1	-1	-1	1	1	-1	-1
GO:MF	RNA exonuclease activity, producing 5'-phosphomonoesters	GO:0016896	40	20212	1	1	95	1	1	1	-1	-1	1	1	-1	-1	1	1	-1	-1
GO:MF	MAP kinase tyrosine/serine/threonine phosphatase activity	GO:0017017	13	20212	1	1	95	1	1	1	-1	-1	1	1	-1	-1	1	1	-1	-1
GO:MF	myosin phosphatase activity	GO:0017018	85	20212	1	1	95	1	1	1	-1	-1	1	1	-1	-1	1	1	-1	-1
GO:MF	snRNA binding	GO:0017069	1224	20212	1	1	95	1	1	1	-1	-1	1	1	-1	-1	1	1	-1	-1
GO:MF	nucleoside diphosphate phosphatase activity	GO:0017110	17	20212	1	1	95	1	1	1	-1	-1	1	1	-1	-1	1	1	-1	-1
GO:MF	SH3 domain binding	GO:0017124	121	20212	1	1	95	2	1	1	-1	-1	1	1	-1	-1	1	1	-1	-1
GO:MF	nitroglycerin reductase activity	GO:0018547	1	20212	1	1	95	1	1	1	-1	-1	1	1	-1	-1	1	1	-1	-1
GO:MF	DNA N-glycosylase activity	GO:0019104	14	20212	1	1	95	1	1	1	-1	-1	1	1	-1	-1	1	1	-1	-1
GO:MF	phenanthrene-epoxide hydrolase activity	GO:0019118	1	20212	1	1	95	1	1	1	-1	-1	1	1	-1	-1	1	1	-1	-1
GO:MF	phenanthrene-9,10-epoxide hydrolase activity	GO:0019119	1	20212	1	1	95	1	1	1	-1	-1	1	1	-1	-1	1	1	-1	-1
GO:MF	phosphatase regulator activity	GO:0019208	109	20212	1	1	95	2	1	1	-1	-1	1	1	-1	-1	1	1	-1	-1
GO:MF	phosphatase activator activity	GO:0019211	20	20212	1	1	95	1	1	1	-1	-1	1	1	-1	-1	1	1	-1	-1
GO:MF	ligase activity, forming phosphoric ester bonds	GO:0016886	6	20212	1	1	95	1	1	1	-1	-1	1	1	-1	-1	1	1	-1	-1
GO:MF	ligase activity, forming carbon-nitrogen bonds	GO:0016879	50	20212	1	1	95	1	1	1	-1	-1	1	1	-1	-1	1	1	-1	-1
GO:MF	acid-thiol ligase activity	GO:0016878	32	20212	1	1	95	1	1	1	93	1	1	1	-1	-1	1	1	-1	-1
GO:MF	transferase activity, transferring sulphur-containing groups	GO:0016782	75	20212	1	1	95	1	1	1	93	2	1	1	-1	-1	1	1	-1	-1
GO:MF	exonuclease activity, active with either ribo- or deoxyribonucleic acids and producing 5'-phosphomonoesters	GO:0016796	61	20212	1	1	95	1	1	1	-1	-1	1	1	-1	-1	1	1	-1	-1
GO:MF	hydrolase activity, acting on glycosyl bonds	GO:0016798	135	20212	1	1	95	1	1	1	-1	-1	1	1	-1	-1	1	1	-1	-1
GO:MF	hydrolase activity, hydrolyzing N-glycosyl compounds	GO:0016799	40	20212	1	1	95	1	1	1	-1	-1	1	1	-1	-1	1	1	-1	-1
GO:MF	hydrolase activity, acting on ether bonds	GO:0016801	9	20212	1	1	95	1	1	1	-1	-1	1	1	-1	-1	1	1	-1	-1
GO:MF	ether hydrolase activity	GO:0016803	9	20212	1	1	95	1	1	1	-1	-1	1	1	-1	-1	1	1	-1	-1
GO:MF	intramolecular oxidoreductase activity, interconverting aldoses and ketoses	GO:0016861	7	20212	1	1	95	1	1	1	-1	-1	1	1	-1	-1	1	1	-1	-1
GO:MF	intramolecular oxidoreductase activity, interconverting keto- and enol-groups	GO:0016862	4	20212	1	1	95	1	1	1	-1	-1	1	1	-1	-1	1	1	-1	-1
GO:MF	centromeric DNA binding	GO:0019237	6	20212	1	1	95	1	1	1	-1	-1	1	1	-1	-1	1	1	-1	-1
GO:MF	Atg8-family ligase activity	GO:0019776	2	20212	1	1	95	1	1	1	-1	-1	1	1	-1	-1	1	1	-1	-1
GO:MF	ubiquitin-like protein peptidase activity	GO:0019783	134	20212	1	1	95	2	1	1	-1	-1	1	1	-1	-1	1	1	-1	-1
GO:MF	clathrin binding	GO:0030276	58	20212	1	1	95	2	1	1	93	1	1	1	-1	-1	1	1	-1	-1
GO:MF	nuclear estrogen receptor activity	GO:0030284	4	20212	1	1	95	1	1	1	-1	-1	1	1	-1	-1	1	1	-1	-1
GO:MF	nuclear estrogen receptor binding	GO:0030331	41	20212	1	1	95	1	1	1	-1	-1	1	1	-1	-1	1	1	-1	-1
GO:MF	cyclin binding	GO:0030332	34	20212	1	1	95	1	1	1	-1	-1	1	1	-1	-1	1	1	-1	-1
GO:MF	DNA polymerase processivity factor activity	GO:0030337	3	20212	1	1	95	1	1	1	-1	-1	1	1	-1	-1	1	1	-1	-1
GO:MF	U2 snRNA binding	GO:0030620	9	20212	1	1	95	1	1	1	-1	-1	1	1	-1	-1	1	1	-1	-1
GO:MF	receptor tyrosine kinase binding	GO:0030971	80	20212	1	1	95	2	1	1	-1	-1	1	1	-1	-1	1	1	-1	-1
GO:MF	mismatched DNA binding	GO:0030983	15	20212	1	1	95	1	1	1	-1	-1	1	1	-1	-1	1	1	-1	-1
GO:MF	nucleosomal DNA binding	GO:0031492	40	20212	1	1	95	2	1	1	-1	-1	1	1	-1	-1	1	1	-1	-1
GO:MF	ubiquitin conjugating enzyme binding	GO:0031624	31	20212	1	1	95	1	1	1	-1	-1	1	1	-1	-1	1	1	-1	-1
GO:MF	Tat protein binding	GO:0030957	10	20212	1	1	95	1	1	1	-1	-1	1	1	-1	-1	1	1	-1	-1
GO:MF	protein phosphatase regulator activity	GO:0019888	96	20212	1	1	95	2	1	1	-1	-1	1	1	-1	-1	1	1	-1	-1
GO:MF	kinesin binding	GO:0019894	45	20212	1	1	95	1	1	1	-1	-1	1	1	-1	-1	1	1	-1	-1
GO:MF	syntaxin binding	GO:0019905	65	20212	1	1	95	1	1	1	93	1	1	1	-1	-1	1	1	-1	-1
GO:MF	leak channel activity	GO:0022840	19	20212	1	1	95	1	1	1	93	1	1	1	-1	-1	1	1	-1	-1
GO:MF	potassium ion leak channel activity	GO:0022841	16	20212	1	1	95	1	1	1	93	1	1	1	-1	-1	1	1	-1	-1
GO:MF	narrow pore channel activity	GO:0022842	19	20212	1	1	95	1	1	1	93	1	1	1	-1	-1	1	1	-1	-1
GO:MF	Atg12 transferase activity	GO:0019777	2	20212	1	1	95	1	1	1	-1	-1	1	1	-1	-1	1	1	-1	-1
GO:MF	taste receptor activity	GO:0008527	26	20212	1	1	-1	-1	1	1	93	1	1	1	-1	-1	1	1	-1	-1
GO:MF	minus-end-directed microtubule motor activity	GO:0008569	17	20212	1	1	-1	-1	1	1	93	2	1	1	-1	-1	1	1	-1	-1
GO:MF	fructokinase activity	GO:0008865	5	20212	1	1	-1	-1	1	1	93	1	1	1	-1	-1	1	1	-1	-1
GO:MF	cyclase activity	GO:0009975	21	20212	1	1	-1	-1	1	1	93	1	1	1	-1	-1	1	1	-1	-1
GO:MF	FMN binding	GO:0010181	15	20212	1	1	-1	-1	1	1	93	1	1	1	-1	-1	1	1	-1	-1
GO:MF	galactosylgalactosylxylosylprotein 3-beta-glucuronosyltransferase activity	GO:0015018	3	20212	1	1	-1	-1	1	1	93	1	1	1	-1	-1	1	1	-1	-1
GO:MF	sialyltransferase activity	GO:0008373	22	20212	1	1	-1	-1	1	1	93	1	1	1	-1	-1	1	1	-1	-1
GO:MF	sulfate transmembrane transporter activity	GO:0015116	15	20212	1	1	-1	-1	1	1	93	1	1	1	-1	-1	1	1	-1	-1
GO:MF	lactate transmembrane transporter activity	GO:0015129	6	20212	1	1	-1	-1	1	1	93	1	1	1	-1	-1	1	1	-1	-1
GO:MF	amino acid transmembrane transporter activity	GO:0015171	101	20212	1	1	-1	-1	1	1	93	3	1	1	-1	-1	1	1	-1	-1
GO:MF	basic amino acid transmembrane transporter activity	GO:0015174	19	20212	1	1	-1	-1	1	1	93	1	1	1	-1	-1	1	1	-1	-1
GO:MF	neutral L-amino acid transmembrane transporter activity	GO:0015175	42	20212	1	1	-1	-1	1	1	93	1	1	1	-1	-1	1	1	-1	-1
GO:MF	L-amino acid transmembrane transporter activity	GO:0015179	65	20212	1	1	-1	-1	1	1	93	1	1	1	-1	-1	1	1	-1	-1
GO:MF	L-cystine transmembrane transporter activity	GO:0015184	4	20212	1	1	-1	-1	1	1	93	1	1	1	-1	-1	1	1	-1	-1
GO:MF	proton channel activity	GO:0015252	27	20212	1	1	-1	-1	1	1	93	1	1	1	-1	-1	1	1	-1	-1
GO:MF	calcium-activated potassium channel activity	GO:0015269	13	20212	1	1	-1	-1	1	1	93	1	1	1	-1	-1	1	1	-1	-1
GO:MF	methyl-CpG binding	GO:0008327	30	20212	1	1	-1	-1	1	1	93	1	1	1	-1	-1	1	1	-1	-1
GO:MF	hyaluronic acid binding	GO:0005540	30	20212	1	1	-1	-1	1	1	93	1	1	1	-1	-1	1	1	-1	-1
GO:MF	calcium-dependent phospholipid binding	GO:0005544	52	20212	1	1	-1	-1	1	1	93	1	1	1	-1	-1	1	1	-1	-1
GO:MF	phosphatidylinositol-4,5-bisphosphate binding	GO:0005546	84	20212	1	1	-1	-1	1	1	93	1	1	1	-1	-1	1	1	-1	-1
GO:MF	beta-catenin binding	GO:0008013	89	20212	1	1	-1	-1	1	1	93	2	1	1	-1	-1	1	1	-1	-1
GO:MF	nuclear localization sequence binding	GO:0008139	24	20212	1	1	-1	-1	1	1	93	1	1	1	-1	-1	1	1	-1	-1
GO:MF	adenylate cyclase binding	GO:0008179	12	20212	1	1	-1	-1	1	1	93	1	1	1	-1	-1	1	1	-1	-1
GO:MF	secondary active sulfate transmembrane transporter activity	GO:0008271	11	20212	1	1	-1	-1	1	1	93	1	1	1	-1	-1	1	1	-1	-1
GO:MF	store-operated calcium channel activity	GO:0015279	10	20212	1	1	-1	-1	1	1	93	1	1	1	-1	-1	1	1	-1	-1
GO:MF	carbon-oxygen lyase activity	GO:0016835	76	20212	1	1	-1	-1	1	1	93	1	1	1	-1	-1	1	1	-1	-1
GO:MF	hydro-lyase activity	GO:0016836	59	20212	1	1	-1	-1	1	1	93	1	1	1	-1	-1	1	1	-1	-1
GO:MF	phosphorus-oxygen lyase activity	GO:0016849	24	20212	1	1	-1	-1	1	1	93	1	1	1	-1	-1	1	1	-1	-1
GO:MF	GABA receptor activity	GO:0016917	22	20212	1	1	-1	-1	1	1	93	2	1	1	-1	-1	1	1	-1	-1
GO:MF	myosin binding	GO:0017022	74	20212	1	1	-1	-1	1	1	93	1	1	1	-1	-1	1	1	-1	-1
GO:MF	structural constituent of nuclear pore	GO:0017056	25	20212	1	1	-1	-1	1	1	93	1	1	1	-1	-1	1	1	-1	-1
GO:MF	intramolecular transferase activity	GO:0016866	28	20212	1	1	-1	-1	1	1	93	1	1	1	-1	-1	1	1	-1	-1
GO:MF	sodium:sulfate symporter activity	GO:0015382	2	20212	1	1	-1	-1	1	1	93	1	1	1	-1	-1	1	1	-1	-1
GO:MF	morphogen activity	GO:0016015	7	20212	1	1	-1	-1	1	1	93	1	1	1	-1	-1	1	1	-1	-1
GO:MF	superoxide-generating NAD(P)H oxidase activity	GO:0016175	10	20212	1	1	-1	-1	1	1	93	1	1	1	-1	-1	1	1	-1	-1
GO:MF	amino acid binding	GO:0016597	51	20212	1	1	-1	-1	1	1	93	1	1	1	-1	-1	1	1	-1	-1
GO:MF	oxidoreductase activity, acting on NAD(P)H	GO:0016651	88	20212	1	1	-1	-1	1	1	93	1	1	1	-1	-1	1	1	-1	-1
GO:MF	oxidoreductase activity, acting on single donors with incorporation of molecular oxygen	GO:0016701	25	20212	1	1	-1	-1	1	1	93	1	1	1	-1	-1	1	1	-1	-1
GO:MF	oxidoreductase activity, acting on single donors with incorporation of molecular oxygen, incorporation of two atoms of oxygen	GO:0016702	24	20212	1	1	-1	-1	1	1	93	1	1	1	-1	-1	1	1	-1	-1
GO:MF	mannose binding	GO:0005537	25	20212	1	1	-1	-1	1	1	93	1	1	1	-1	-1	1	1	-1	-1
GO:MF	glucose binding	GO:0005536	12	20212	1	1	-1	-1	1	1	93	1	1	1	-1	-1	1	1	-1	-1
GO:MF	telomerase activity	GO:0003720	8	20212	1	1	-1	-1	1	1	93	1	1	1	-1	-1	1	1	-1	-1
GO:MF	telomerase RNA reverse transcriptase activity	GO:0003721	2	20212	1	1	-1	-1	1	1	93	1	1	1	-1	-1	1	1	-1	-1
GO:MF	alpha-N-acetylneuraminate alpha-2,8-sialyltransferase activity	GO:0003828	6	20212	1	1	-1	-1	1	1	93	1	1	1	-1	-1	1	1	-1	-1
GO:MF	beta-ureidopropionase activity	GO:0003837	1	20212	1	1	-1	-1	1	1	93	1	1	1	-1	-1	1	1	-1	-1
GO:MF	RNA-directed DNA polymerase activity	GO:0003964	9	20212	1	1	-1	-1	1	1	93	1	1	1	-1	-1	1	1	-1	-1
GO:MF	RNA-dependent RNA polymerase activity	GO:0003968	1	20212	1	1	-1	-1	1	1	93	1	1	1	-1	-1	1	1	-1	-1
GO:MF	adenylate cyclase activity	GO:0004016	16	20212	1	1	-1	-1	1	1	93	1	1	1	-1	-1	1	1	-1	-1
GO:MF	glucokinase activity	GO:0004340	5	20212	1	1	-1	-1	1	1	93	1	1	1	-1	-1	1	1	-1	-1
GO:MF	guanylate cyclase activity	GO:0004383	8	20212	1	1	-1	-1	1	1	93	1	1	1	-1	-1	1	1	-1	-1
GO:MF	hexokinase activity	GO:0004396	5	20212	1	1	-1	-1	1	1	93	1	1	1	-1	-1	1	1	-1	-1
GO:MF	G-quadruplex RNA binding	GO:0002151	7	20212	1	1	-1	-1	1	1	93	1	1	1	-1	-1	1	1	-1	-1
GO:MF	tRNA binding	GO:0000049	80	20212	1	1	-1	-1	1	1	93	1	1	1	-1	-1	1	1	-1	-1
GO:MF	sulfur amino acid transmembrane transporter activity	GO:0000099	11	20212	1	1	-1	-1	1	1	93	1	1	1	-1	-1	1	1	-1	-1
GO:MF	transcription coactivator binding	GO:0001223	47	20212	1	1	-1	-1	1	1	93	2	1	1	-1	-1	1	1	-1	-1
GO:MF	N-acetylglucosamine 6-O-sulfotransferase activity	GO:0001517	7	20212	1	1	-1	-1	1	1	93	1	1	1	-1	-1	1	1	-1	-1
GO:MF	neuromedin U receptor activity	GO:0001607	2	20212	1	1	-1	-1	1	1	93	1	1	1	-1	-1	1	1	-1	-1
GO:MF	galactosylceramide sulfotransferase activity	GO:0001733	4	20212	1	1	-1	-1	1	1	93	1	1	1	-1	-1	1	1	-1	-1
GO:MF	prostaglandin J receptor activity	GO:0001785	2	20212	1	1	-1	-1	1	1	93	1	1	1	-1	-1	1	1	-1	-1
GO:MF	phosphatidylserine binding	GO:0001786	60	20212	1	1	-1	-1	1	1	93	1	1	1	-1	-1	1	1	-1	-1
GO:MF	calcium-activated cation channel activity	GO:0005227	27	20212	1	1	-1	-1	1	1	93	1	1	1	-1	-1	1	1	-1	-1
GO:MF	gap junction channel activity	GO:0005243	22	20212	1	1	-1	-1	1	1	93	1	1	1	-1	-1	1	1	-1	-1
GO:MF	fibroblast growth factor receptor binding	GO:0005104	26	20212	1	1	-1	-1	1	1	93	1	1	1	-1	-1	1	1	-1	-1
GO:MF	signal sequence binding	GO:0005048	46	20212	1	1	-1	-1	1	1	93	1	1	1	-1	-1	1	1	-1	-1
GO:MF	asialoglycoprotein receptor activity	GO:0004873	2	20212	1	1	-1	-1	1	1	93	1	1	1	-1	-1	1	1	-1	-1
GO:MF	GABA-A receptor activity	GO:0004890	19	20212	1	1	-1	-1	1	1	93	2	1	1	-1	-1	1	1	-1	-1
GO:MF	cytokine receptor activity	GO:0004896	101	20212	1	1	-1	-1	1	1	93	2	1	1	-1	-1	1	1	-1	-1
GO:MF	interleukin-5 receptor activity	GO:0004914	2	20212	1	1	-1	-1	1	1	93	1	1	1	-1	-1	1	1	-1	-1
GO:MF	interleukin-9 receptor activity	GO:0004919	1	20212	1	1	-1	-1	1	1	93	1	1	1	-1	-1	1	1	-1	-1
GO:MF	adrenergic receptor activity	GO:0004935	10	20212	1	1	-1	-1	1	1	93	1	1	1	-1	-1	1	1	-1	-1
GO:MF	alpha-adrenergic receptor activity	GO:0004936	6	20212	1	1	-1	-1	1	1	93	1	1	1	-1	-1	1	1	-1	-1
GO:MF	alpha2-adrenergic receptor activity	GO:0004938	3	20212	1	1	-1	-1	1	1	93	1	1	1	-1	-1	1	1	-1	-1
GO:MF	prostaglandin D receptor activity	GO:0004956	2	20212	1	1	-1	-1	1	1	93	1	1	1	-1	-1	1	1	-1	-1
GO:MF	prostaglandin F receptor activity	GO:0004958	2	20212	1	1	-1	-1	1	1	93	1	1	1	-1	-1	1	1	-1	-1
GO:MF	gonadotropin-releasing hormone receptor activity	GO:0004968	2	20212	1	1	-1	-1	1	1	93	1	1	1	-1	-1	1	1	-1	-1
GO:MF	glutamate-gated receptor activity	GO:0004970	19	20212	1	1	-1	-1	1	1	93	2	1	1	-1	-1	1	1	-1	-1
GO:MF	G protein-coupled serotonin receptor activity	GO:0004993	22	20212	1	1	-1	-1	1	1	93	2	1	1	-1	-1	1	1	-1	-1
GO:MF	nitric-oxide synthase activity	GO:0004517	3	20212	1	1	-1	-1	1	1	93	1	1	1	-1	-1	1	1	-1	-1
GO:MF	activin receptor binding	GO:0070697	12	20212	1	1	-1	-1	1	1	93	1	1	1	-1	-1	1	1	-1	-1
GO:MF	type I activin receptor binding	GO:0070698	2	20212	1	1	-1	-1	1	1	93	1	1	1	-1	-1	1	1	-1	-1
GO:MF	modified amino acid binding	GO:0072341	90	20212	1	1	-1	-1	1	1	93	1	1	1	-1	-1	1	1	-1	-1
GO:MF	modified amino acid transmembrane transporter activity	GO:0072349	29	20212	1	1	-1	-1	1	1	93	1	1	1	-1	-1	1	1	-1	-1
GO:MF	transmembrane receptor protein serine/threonine kinase binding	GO:0070696	24	20212	1	1	-1	-1	1	1	93	1	1	1	-1	-1	1	1	-1	-1
GO:MF	RNA polymerase activity	GO:0097747	34	20212	1	1	-1	-1	1	1	93	1	1	1	-1	-1	1	1	-1	-1
GO:MF	template-free RNA nucleotidyltransferase	GO:0098680	1	20212	1	1	-1	-1	1	1	93	1	1	1	-1	-1	1	1	-1	-1
GO:MF	G protein-coupled neurotransmitter receptor activity involved in regulation of postsynaptic cytosolic calcium ion concentration	GO:0098872	1	20212	1	1	-1	-1	1	1	93	1	1	1	-1	-1	1	1	-1	-1
GO:MF	ligand-gated monoatomic anion channel activity	GO:0099095	20	20212	1	1	-1	-1	1	1	93	1	1	1	-1	-1	1	1	-1	-1
GO:MF	voltage-gated calcium channel activity involved in regulation of cytosolic calcium levels	GO:0099511	4	20212	1	1	-1	-1	1	1	93	1	1	1	-1	-1	1	1	-1	-1
GO:MF	G protein-coupled neurotransmitter receptor activity	GO:0099528	12	20212	1	1	-1	-1	1	1	93	1	1	1	-1	-1	1	1	-1	-1
GO:MF	inositol 1,4,5 trisphosphate binding	GO:0070679	12	20212	1	1	-1	-1	1	1	93	1	1	1	-1	-1	1	1	-1	-1
GO:MF	oxidoreductase activity, acting on NAD(P)H, oxygen as acceptor	GO:0050664	16	20212	1	1	-1	-1	1	1	93	1	1	1	-1	-1	1	1	-1	-1
GO:MF	galactose 3-O-sulfotransferase activity	GO:0050694	4	20212	1	1	-1	-1	1	1	93	1	1	1	-1	-1	1	1	-1	-1
GO:MF	protein kinase A binding	GO:0051018	53	20212	1	1	-1	-1	1	1	93	1	1	1	-1	-1	1	1	-1	-1
GO:MF	hepoxilin A3 synthase activity	GO:0051120	1	20212	1	1	-1	-1	1	1	93	1	1	1	-1	-1	1	1	-1	-1
GO:MF	muscle alpha-actinin binding	GO:0051371	15	20212	1	1	-1	-1	1	1	93	1	1	1	-1	-1	1	1	-1	-1
GO:MF	R-SMAD binding	GO:0070412	25	20212	1	1	-1	-1	1	1	93	1	1	1	-1	-1	1	1	-1	-1
GO:MF	epinephrine binding	GO:0051379	6	20212	1	1	-1	-1	1	1	93	1	1	1	-1	-1	1	1	-1	-1
GO:MF	dynein light intermediate chain binding	GO:0051959	28	20212	1	1	-1	-1	1	1	93	2	1	1	-1	-1	1	1	-1	-1
GO:MF	gap junction hemi-channel activity	GO:0055077	3	20212	1	1	-1	-1	1	1	93	1	1	1	-1	-1	1	1	-1	-1
GO:MF	telomerase RNA binding	GO:0070034	22	20212	1	1	-1	-1	1	1	93	1	1	1	-1	-1	1	1	-1	-1
GO:MF	titin Z domain binding	GO:0070080	2	20212	1	1	-1	-1	1	1	93	1	1	1	-1	-1	1	1	-1	-1
GO:MF	G protein-coupled receptor activity involved in regulation of postsynaptic membrane potential	GO:0099530	4	20212	1	1	-1	-1	1	1	93	1	1	1	-1	-1	1	1	-1	-1
GO:MF	neurotransmitter receptor activity involved in regulation of postsynaptic cytosolic calcium ion concentration	GO:0099583	3	20212	1	1	-1	-1	1	1	93	1	1	1	-1	-1	1	1	-1	-1
GO:MF	ligand-gated calcium channel activity	GO:0099604	27	20212	1	1	-1	-1	1	1	93	2	1	1	-1	-1	1	1	-1	-1
GO:MF	voltage-gated calcium channel activity involved in regulation of presynaptic cytosolic calcium levels	GO:0099626	4	20212	1	1	-1	-1	1	1	93	1	1	1	-1	-1	1	1	-1	-1
GO:MF	hydroperoxy icosatetraenoate isomerase activity	GO:0106255	2	20212	1	1	-1	-1	1	1	93	1	1	1	-1	-1	1	1	-1	-1
GO:MF	hydroperoxy icosatetraenoate dehydratase activity	GO:0106256	7	20212	1	1	-1	-1	1	1	93	1	1	1	-1	-1	1	1	-1	-1
GO:MF	superoxide-generating NADPH oxidase activity	GO:0106292	1	20212	1	1	-1	-1	1	1	93	1	1	1	-1	-1	1	1	-1	-1
GO:MF	broad specificity neutral L-amino acid:basic L-amino acid antiporter activity	GO:0180009	1	20212	1	1	-1	-1	1	1	93	1	1	1	-1	-1	1	1	-1	-1
GO:MF	phosphatidylinositol bisphosphate binding	GO:1902936	108	20212	1	1	-1	-1	1	1	93	1	1	1	-1	-1	1	1	-1	-1
GO:MF	P-type calcium transporter activity involved in regulation of postsynaptic cytosolic calcium ion concentration	GO:1905059	1	20212	1	1	-1	-1	1	1	93	1	1	1	-1	-1	1	1	-1	-1
GO:MF	intramolecular hydroxytransferase activity	GO:0050486	2	20212	1	1	-1	-1	1	1	93	1	1	1	-1	-1	1	1	-1	-1
GO:MF	beta-tubulin binding	GO:0048487	42	20212	1	1	-1	-1	1	1	93	1	1	1	-1	-1	1	1	-1	-1
GO:MF	cobalamin binding	GO:0031419	10	20212	1	1	-1	-1	1	1	93	1	1	1	-1	-1	1	1	-1	-1
GO:MF	titin binding	GO:0031432	13	20212	1	1	-1	-1	1	1	93	1	1	1	-1	-1	1	1	-1	-1
GO:MF	telethonin binding	GO:0031433	7	20212	1	1	-1	-1	1	1	93	1	1	1	-1	-1	1	1	-1	-1
GO:MF	adenosine receptor binding	GO:0031685	7	20212	1	1	-1	-1	1	1	93	1	1	1	-1	-1	1	1	-1	-1
GO:MF	A2A adenosine receptor binding	GO:0031687	3	20212	1	1	-1	-1	1	1	93	1	1	1	-1	-1	1	1	-1	-1
GO:MF	prostanoid receptor binding	GO:0031862	3	20212	1	1	-1	-1	1	1	93	1	1	1	-1	-1	1	1	-1	-1
GO:MF	thromboxane A2 receptor binding	GO:0031870	2	20212	1	1	-1	-1	1	1	93	1	1	1	-1	-1	1	1	-1	-1
GO:MF	very long-chain fatty acid-CoA ligase activity	GO:0031957	10	20212	1	1	-1	-1	1	1	93	1	1	1	-1	-1	1	1	-1	-1
GO:MF	sour taste receptor activity	GO:0033040	2	20212	1	1	-1	-1	1	1	93	1	1	1	-1	-1	1	1	-1	-1
GO:MF	cytokine binding	GO:0019955	145	20212	1	1	-1	-1	1	1	93	3	1	1	-1	-1	1	1	-1	-1
GO:MF	interleukin-9 binding	GO:0019983	1	20212	1	1	-1	-1	1	1	93	1	1	1	-1	-1	1	1	-1	-1
GO:MF	wide pore channel activity	GO:0022829	36	20212	1	1	-1	-1	1	1	93	1	1	1	-1	-1	1	1	-1	-1
GO:MF	monoatomic ion-gated channel activity	GO:0022839	31	20212	1	1	-1	-1	1	1	93	1	1	1	-1	-1	1	1	-1	-1
GO:MF	GABA-gated chloride ion channel activity	GO:0022851	13	20212	1	1	-1	-1	1	1	93	1	1	1	-1	-1	1	1	-1	-1
GO:MF	carbohydrate kinase activity	GO:0019200	21	20212	1	1	-1	-1	1	1	93	1	1	1	-1	-1	1	1	-1	-1
GO:MF	receptor serine/threonine kinase binding	GO:0033612	30	20212	1	1	-1	-1	1	1	93	1	1	1	-1	-1	1	1	-1	-1
GO:MF	5'-3' RNA polymerase activity	GO:0034062	34	20212	1	1	-1	-1	1	1	93	1	1	1	-1	-1	1	1	-1	-1
GO:MF	amine binding	GO:0043176	15	20212	1	1	-1	-1	1	1	93	2	1	1	-1	-1	1	1	-1	-1
GO:MF	protein-membrane adaptor activity	GO:0043495	37	20212	1	1	-1	-1	1	1	93	1	1	1	-1	-1	1	1	-1	-1
GO:MF	inositol 1,3,4,5 tetrakisphosphate binding	GO:0043533	5	20212	1	1	-1	-1	1	1	93	1	1	1	-1	-1	1	1	-1	-1
GO:MF	gamma-catenin binding	GO:0045295	12	20212	1	1	-1	-1	1	1	93	1	1	1	-1	-1	1	1	-1	-1
GO:MF	protein kinase A regulatory subunit binding	GO:0034237	25	20212	1	1	-1	-1	1	1	93	1	1	1	-1	-1	1	1	-1	-1
GO:MF	tetrahydrobiopterin binding	GO:0034617	4	20212	1	1	-1	-1	1	1	93	1	1	1	-1	-1	1	1	-1	-1
GO:MF	arginine binding	GO:0034618	8	20212	1	1	-1	-1	1	1	93	1	1	1	-1	-1	1	1	-1	-1
GO:MF	BMP binding	GO:0036122	20	20212	1	1	-1	-1	1	1	93	1	1	1	-1	-1	1	1	-1	-1
GO:MF	chemoattractant activity	GO:0042056	42	20212	1	1	-1	-1	1	1	93	1	1	1	-1	-1	1	1	-1	-1
GO:MF	telomeric DNA binding	GO:0042162	38	20212	1	1	-1	-1	1	1	93	1	1	1	-1	-1	1	1	-1	-1
GO:MF	peptide antigen binding	GO:0042605	42	20212	1	1	-1	-1	1	1	93	1	1	1	-1	-1	1	1	-1	-1
GO:MF	fucose binding	GO:0042806	8	20212	1	1	-1	-1	1	1	93	1	1	1	-1	-1	1	1	-1	-1
GO:MF	neuromedin U binding	GO:0042924	2	20212	1	1	-1	-1	1	1	93	1	1	1	-1	-1	1	1	-1	-1
GO:MF	alpha-tubulin binding	GO:0043014	45	20212	1	1	-1	-1	1	1	93	1	1	1	-1	-1	1	1	-1	-1
GO:MF	cysteine-type endopeptidase inhibitor activity involved in apoptotic process	GO:0043027	19	20212	1	1	-1	-1	1	1	93	1	1	1	-1	-1	1	1	-1	-1
GO:MF	cysteine-type endopeptidase regulator activity involved in apoptotic process	GO:0043028	41	20212	1	1	-1	-1	1	1	93	1	1	1	-1	-1	1	1	-1	-1
GO:MF	DNA polymerase activity	GO:0034061	33	20212	1	1	-1	-1	1	1	93	1	1	1	-1	-1	1	1	-1	-1
GO:BP	cellular response to endogenous stimulus	GO:0071495	1432	21031	0.000199643	0.000199643	96	23	1	1	90	12	1	1	97	13	1	1	93	8
GO:BP	response to endogenous stimulus	GO:0009719	1678	21031	0.000204881	0.000204881	96	25	1	1	90	14	1	1	97	16	1	1	93	11
GO:BP	organonitrogen compound metabolic process	GO:1901564	5986	21031	0.000753794	0.000753794	96	51	1	1	90	31	1	1	97	32	1	1	93	35
GO:BP	negative regulation of signal transduction	GO:0009968	1290	21031	0.00286745	0.00286745	96	20	1	1	90	9	1	1	97	9	1	1	93	6
GO:BP	response to organic cyclic compound	GO:0014070	905	21031	0.00755138	0.00755138	96	16	1	1	90	8	1	1	97	10	1	1	93	3
GO:BP	hormone-mediated signaling pathway	GO:0009755	200	21031	0.00897449	0.00897449	96	8	1	1	90	3	1	1	97	2	1	1	93	1
GO:BP	steroid hormone mediated signaling pathway	GO:0043401	141	21031	0.00904807	0.00904807	96	7	1	1	90	2	1	1	97	1	1	1	93	1
GO:BP	negative regulation of signaling	GO:0023057	1398	21031	0.0097972	0.0097972	96	20	1	1	90	9	1	1	97	9	1	1	93	7
GO:BP	negative regulation of cell communication	GO:0010648	1398	21031	0.0097972	0.0097972	96	20	1	1	90	9	1	1	97	9	1	1	93	7
GO:BP	regulation of protein metabolic process	GO:0051246	2102	21031	0.0133888	0.0133888	96	25	1	1	90	13	1	1	97	9	1	1	93	10
GO:BP	catabolic process	GO:0009056	2556	21031	0.0151405	0.0151405	96	28	1	1	90	10	1	1	97	15	1	1	93	15
GO:BP	cellular response to steroid hormone stimulus	GO:0071383	215	21031	0.0152889	0.0152889	96	8	1	1	90	2	1	1	97	2	1	1	93	1
GO:BP	negative regulation of protein metabolic process	GO:0051248	766	21031	0.0229943	0.0229943	96	14	1	1	90	5	1	1	97	8	1	1	-1	-1
GO:BP	positive regulation of nucleobase-containing compound metabolic process	GO:0045935	2052	21031	0.0288556	0.0288556	96	24	1	1	90	7	1	1	97	18	1	1	93	12
GO:BP	negative regulation of nitrogen compound metabolic process	GO:0051172	2202	21031	0.0302088	0.0302088	96	25	1	1	90	10	1	1	97	18	1	1	93	6
GO:BP	negative regulation of response to stimulus	GO:0048585	1648	21031	0.0322231	0.0322231	96	21	1	1	90	9	1	1	97	13	1	1	93	9
GO:BP	regulation of signal transduction	GO:0009966	3010	21031	0.0417756	0.0417756	96	30	1	1	90	24	1	1	97	19	1	1	93	20
GO:BP	intracellular steroid hormone receptor signaling pathway	GO:0030518	124	21031	0.0532408	0.0532408	96	6	1	1	90	2	1	1	97	1	1	1	93	1
GO:BP	positive regulation of biological process	GO:0048518	6250	21031	0.0555209	0.0555209	96	48	1	1	90	36	1	1	97	39	1	1	93	38
GO:BP	response to steroid hormone	GO:0048545	337	21031	0.0568394	0.0568394	96	9	1	1	90	4	1	1	97	3	1	1	93	2
GO:BP	positive regulation of cellular process	GO:0048522	5717	21031	0.0672665	0.0672665	96	45	1	1	90	35	1	1	97	38	1	1	93	32
GO:BP	cellular response to organic cyclic compound	GO:0071407	535	21031	0.0776902	0.0776902	96	11	1	1	90	6	1	1	97	5	1	1	93	1
GO:BP	positive regulation of nitrogen compound metabolic process	GO:0051173	3001	21031	0.109292	0.109292	96	29	1	1	90	13	1	1	97	20	1	1	93	19
GO:BP	regulation of molecular function	GO:0065009	1799	21031	0.118633	0.118633	96	21	1	1	90	11	1	1	97	13	1	1	93	8
GO:BP	protein metabolic process	GO:0019538	4912	21031	0.121408	0.121408	96	40	1	1	90	24	1	1	97	23	1	1	93	28
GO:BP	phosphate-containing compound metabolic process	GO:0006796	2571	21031	0.145441	0.145441	96	26	1	1	90	10	1	1	97	17	1	1	93	15
GO:BP	anatomical structure development	GO:0048856	5899	21031	0.154867	0.154867	96	45	0.121689	0.121689	90	43	0.0138873	0.0138873	97	48	1	1	93	39
GO:BP	phosphorus metabolic process	GO:0006793	2596	21031	0.171294	0.171294	96	26	1	1	90	10	1	1	97	17	1	1	93	15
GO:BP	response to lipid	GO:0033993	920	21031	0.171873	0.171873	96	14	1	1	90	7	1	1	97	7	1	1	93	4
GO:BP	regulation of signaling	GO:0023051	3437	21031	0.205127	0.205127	96	31	0.845055	0.845055	90	28	1	1	97	27	1	1	93	25
GO:BP	negative regulation of MAPK cascade	GO:0043409	158	21031	0.206673	0.206673	96	6	1	1	90	1	1	1	97	1	1	1	-1	-1
GO:BP	regulation of cell communication	GO:0010646	3443	21031	0.212085	0.212085	96	31	0.870095	0.870095	90	28	1	1	97	27	1	1	93	25
GO:BP	response to growth factor	GO:0070848	711	21031	0.224893	0.224893	96	12	1	1	90	4	1	1	97	6	1	1	93	5
GO:BP	cellular response to hormone stimulus	GO:0032870	609	21031	0.248056	0.248056	96	11	1	1	90	6	1	1	97	7	1	1	93	3
GO:BP	enzyme-linked receptor protein signaling pathway	GO:0007167	967	21031	0.291159	0.291159	96	14	1	1	90	7	1	1	97	9	1	1	93	7
GO:BP	positive regulation of cellular metabolic process	GO:0031325	3346	21031	0.313424	0.313424	96	30	1	1	90	12	1	1	97	24	1	1	93	17
GO:BP	positive regulation of metabolic process	GO:0009893	3711	21031	0.358477	0.358477	96	32	1	1	90	16	1	1	97	26	1	1	93	20
GO:BP	regulation of nucleobase-containing compound metabolic process	GO:0019219	4063	21031	0.365962	0.365962	96	34	1	1	90	11	1	1	97	27	1	1	93	21
GO:BP	response to hormone	GO:0009725	874	21031	0.398972	0.398972	96	13	1	1	90	9	1	1	97	9	1	1	93	7
GO:BP	small molecule metabolic process	GO:0044281	1813	21031	0.402522	0.402522	96	20	1	1	90	9	1	1	97	10	1	1	93	11
GO:BP	cell cycle	GO:0007049	1819	21031	0.420791	0.420791	96	20	1	1	90	7	1	1	97	8	1	1	93	10
GO:BP	negative regulation of macromolecule metabolic process	GO:0010605	3240	21031	0.438456	0.438456	96	29	1	1	90	13	1	1	97	18	1	1	93	7
GO:BP	positive regulation of macromolecule metabolic process	GO:0010604	3420	21031	0.466751	0.466751	96	30	1	1	90	15	1	1	97	22	1	1	93	20
GO:BP	cellular nitrogen compound biosynthetic process	GO:0044271	4836	21031	0.47164	0.47164	96	38	1	1	90	15	1	1	97	27	1	1	93	27
GO:BP	regulation of response to stimulus	GO:0048583	3939	21031	0.471804	0.471804	96	33	1	1	90	25	1	1	97	25	1	1	93	29
GO:BP	negative regulation of MHC class II biosynthetic process	GO:0045347	5	21031	0.486586	0.486586	96	2	1	1	-1	-1	1	1	-1	-1	1	1	-1	-1
GO:BP	positive regulation of deoxyribonuclease activity	GO:0032077	5	21031	0.486586	0.486586	96	2	1	1	-1	-1	1	1	-1	-1	1	1	-1	-1
GO:BP	regulation of primary metabolic process	GO:0080090	5591	21031	0.486853	0.486853	96	42	1	1	90	21	1	1	97	34	1	1	93	30
GO:BP	negative regulation of phosphate metabolic process	GO:0045936	355	21031	0.528882	0.528882	96	8	1	1	90	1	1	1	97	4	1	1	93	1
GO:BP	regulation of proteolysis	GO:0030162	555	21031	0.530805	0.530805	96	10	1	1	90	4	1	1	97	3	1	1	93	3
GO:BP	negative regulation of phosphorus metabolic process	GO:0010563	356	21031	0.539034	0.539034	96	8	1	1	90	1	1	1	97	4	1	1	93	1
GO:BP	system development	GO:0048731	3973	21031	0.557181	0.557181	96	33	0.000632851	0.000632851	90	38	0.0441845	0.0441845	97	36	1	1	93	25
GO:BP	cellular response to hydrogen peroxide	GO:0070301	66	21031	0.56326	0.56326	96	4	1	1	-1	-1	1	1	-1	-1	1	1	-1	-1
GO:BP	negative regulation of protein phosphorylation	GO:0001933	270	21031	0.570447	0.570447	96	7	1	1	90	1	1	1	97	3	1	1	-1	-1
GO:BP	regulation of nitrogen compound metabolic process	GO:0051171	5440	21031	0.573077	0.573077	96	41	1	1	90	21	1	1	97	33	1	1	93	28
GO:BP	organophosphate metabolic process	GO:0019637	1034	21031	0.582762	0.582762	96	14	1	1	90	6	1	1	97	4	1	1	93	9
GO:BP	carbohydrate metabolic process	GO:0005975	565	21031	0.612187	0.612187	96	10	1	1	90	5	1	1	97	3	1	1	93	6
GO:BP	actin filament organization	GO:0007015	463	21031	0.638044	0.638044	96	9	1	1	90	1	1	1	97	4	1	1	93	2
GO:BP	cellular response to growth factor stimulus	GO:0071363	681	21031	0.653974	0.653974	96	11	1	1	90	4	1	1	97	5	1	1	93	5
GO:BP	cell development	GO:0048468	2819	21031	0.662769	0.662769	96	26	1	1	90	16	1	1	97	24	1	1	93	15
GO:BP	developmental process	GO:0032502	6453	21031	0.691828	0.691828	96	46	0.0370655	0.0370655	90	47	0.0127759	0.0127759	97	51	1	1	93	44
GO:BP	alcohol metabolic process	GO:0006066	371	21031	0.711569	0.711569	96	8	1	1	90	2	1	1	97	2	1	1	93	4
GO:BP	negative regulation of extrinsic apoptotic signaling pathway via death domain receptors	GO:1902042	29	21031	0.735689	0.735689	96	3	1	1	-1	-1	1	1	-1	-1	1	1	-1	-1
GO:BP	nervous system development	GO:0007399	2531	21031	0.81044	0.81044	96	24	0.00291555	0.00291555	90	28	1	1	97	23	1	1	93	14
GO:BP	negative regulation of phosphorylation	GO:0042326	288	21031	0.842827	0.842827	96	7	1	1	90	1	1	1	97	3	1	1	-1	-1
GO:BP	negative regulation of RNA biosynthetic process	GO:1902679	1347	21031	0.889697	0.889697	96	16	1	1	90	6	1	1	97	9	1	1	93	6
GO:BP	mismatch repair	GO:0006298	32	21031	0.988782	0.988782	96	3	1	1	-1	-1	1	1	97	1	1	1	-1	-1
GO:BP	transmembrane transport	GO:0055085	1534	21031	1	1	96	7	1.22833e-09	1.22833e-09	90	30	0.146241	0.146241	97	19	1	1	93	9
GO:BP	monoatomic ion transport	GO:0006811	1256	21031	1	1	96	5	2.80322e-09	2.80322e-09	90	27	0.437669	0.437669	97	16	1	1	93	9
GO:BP	cell-cell signaling	GO:0007267	1704	21031	1	1	96	8	1.78582e-08	1.78582e-08	90	30	0.000327405	0.000327405	97	25	1	1	93	9
GO:BP	calcium ion transmembrane transport	GO:0070588	342	21031	1	1	96	3	3.74475e-08	3.74475e-08	90	15	1	1	97	4	1	1	93	2
GO:BP	inorganic ion transmembrane transport	GO:0098660	900	21031	1	1	96	4	4.60193e-08	4.60193e-08	90	22	0.563119	0.563119	97	13	1	1	93	5
GO:BP	multicellular organismal process	GO:0032501	7669	21031	1	1	96	44	5.32439e-08	5.32439e-08	90	64	2.4753e-05	2.4753e-05	97	63	1	1	93	45
GO:BP	calcium ion transport	GO:0006816	436	21031	1	1	96	3	1.06203e-07	1.06203e-07	90	16	1	1	97	5	1	1	93	3
GO:BP	inorganic cation transmembrane transport	GO:0098662	808	21031	1	1	96	4	3.5645e-07	3.5645e-07	90	20	1	1	97	11	1	1	93	5
GO:BP	monoatomic ion transmembrane transport	GO:0034220	1013	21031	1	1	96	4	4.44379e-07	4.44379e-07	90	22	0.503661	0.503661	97	14	1	1	93	5
GO:BP	monoatomic cation transmembrane transport	GO:0098655	830	21031	1	1	96	4	4.0344e-06	4.0344e-06	90	19	1	1	97	11	1	1	93	5
GO:BP	metal ion transport	GO:0030001	877	21031	1	1	96	5	9.94265e-06	9.94265e-06	90	19	1	1	97	11	1	1	93	8
GO:BP	system process	GO:0003008	2258	21031	1	1	96	9	1.66256e-05	1.66256e-05	90	30	0.0538029	0.0538029	97	25	1	1	93	8
GO:BP	transport	GO:0006810	4350	21031	1	1	96	30	1.90093e-05	1.90093e-05	90	43	1	1	97	32	1	1	93	23
GO:BP	monoatomic cation transport	GO:0006812	1033	21031	1	1	96	5	2.43861e-05	2.43861e-05	90	20	1	1	97	12	1	1	93	8
GO:BP	establishment of localization	GO:0051234	4881	21031	1	1	96	31	6.05246e-05	6.05246e-05	90	45	1	1	97	33	1	1	93	25
GO:BP	chemical synaptic transmission	GO:0007268	750	21031	1	1	96	4	0.000242763	0.000242763	90	16	0.0911734	0.0911734	97	13	1	1	93	5
GO:BP	anterograde trans-synaptic signaling	GO:0098916	750	21031	1	1	96	4	0.000242763	0.000242763	90	16	0.0911734	0.0911734	97	13	1	1	93	5
GO:BP	trans-synaptic signaling	GO:0099537	756	21031	1	1	96	4	0.000270555	0.000270555	90	16	0.0989415	0.0989415	97	13	1	1	93	5
GO:BP	calcium ion transmembrane import into cytosol	GO:0097553	197	21031	1	1	96	2	0.00038581	0.00038581	90	9	1	1	97	3	1	1	93	2
GO:BP	synaptic signaling	GO:0099536	780	21031	1	1	96	4	0.000413177	0.000413177	90	16	0.136099	0.136099	97	13	1	1	93	5
GO:BP	detection of external stimulus	GO:0009581	144	21031	1	1	-1	-1	0.000435989	0.000435989	90	8	1	1	97	2	1	1	-1	-1
GO:BP	detection of abiotic stimulus	GO:0009582	147	21031	1	1	-1	-1	0.000510947	0.000510947	90	8	1	1	97	2	1	1	-1	-1
GO:BP	regulation of membrane potential	GO:0042391	433	21031	1	1	96	6	0.000727665	0.000727665	90	12	1	1	97	6	1	1	93	1
GO:BP	synaptic transmission, glutamatergic	GO:0035249	111	21031	1	1	-1	-1	0.00111591	0.00111591	90	7	1	1	-1	-1	1	1	-1	-1
GO:BP	animal organ development	GO:0048513	3039	21031	1	1	96	23	0.266078	0.266078	90	27	0.00233426	0.00233426	97	33	1	1	93	20
GO:BP	regulation of synaptic transmission, glutamatergic	GO:0051966	79	21031	1	1	-1	-1	0.00255038	0.00255038	90	6	1	1	-1	-1	1	1	-1	-1
GO:BP	localization	GO:0051179	5520	21031	1	1	96	33	0.00274329	0.00274329	90	45	1	1	97	35	1	1	93	27
GO:BP	calcium ion import across plasma membrane	GO:0098703	46	21031	1	1	-1	-1	0.00347959	0.00347959	90	5	1	1	97	2	1	1	93	1
GO:BP	calcium ion import into cytosol	GO:1902656	47	21031	1	1	-1	-1	0.00388074	0.00388074	90	5	1	1	97	2	1	1	93	1
GO:BP	glutamate receptor signaling pathway	GO:0007215	50	21031	1	1	-1	-1	0.00530643	0.00530643	90	5	1	1	97	1	1	1	-1	-1
GO:BP	calcium ion import	GO:0070509	90	21031	1	1	-1	-1	0.00550162	0.00550162	90	6	1	1	97	3	1	1	93	1
GO:BP	regulation of postsynaptic membrane potential	GO:0060078	148	21031	1	1	96	1	0.00772629	0.00772629	90	7	1	1	97	2	1	1	-1	-1
GO:BP	nervous system process	GO:0050877	1484	21031	1	1	96	4	0.00806607	0.00806607	90	20	1	1	97	15	1	1	93	4
GO:BP	animal organ morphogenesis	GO:0009887	1035	21031	1	1	96	8	1	1	90	13	0.0106108	0.0106108	97	17	1	1	93	8
GO:BP	multicellular organism development	GO:0007275	4643	21031	1	1	96	35	0.0121405	0.0121405	90	39	0.237037	0.237037	97	38	1	1	93	33
GO:BP	anatomical structure morphogenesis	GO:0009653	2684	21031	1	1	96	20	1	1	90	22	0.0152657	0.0152657	97	29	1	1	93	19
GO:BP	sensory perception	GO:0007600	953	21031	1	1	96	1	0.0269474	0.0269474	90	15	1	1	97	7	1	1	93	3
GO:BP	response to oxygen-containing compound	GO:1901700	1663	21031	1	1	96	14	1	1	90	15	0.0417097	0.0417097	97	21	1	1	93	9
GO:BP	extracellular matrix organization	GO:0030198	324	21031	1	1	96	4	1	1	90	1	0.0432823	0.0432823	97	9	1	1	93	6
GO:BP	extracellular structure organization	GO:0043062	325	21031	1	1	96	4	1	1	90	1	0.0443473	0.0443473	97	9	1	1	93	6
GO:BP	external encapsulating structure organization	GO:0045229	326	21031	1	1	96	4	1	1	90	1	0.0454345	0.0454345	97	9	1	1	93	6
GO:BP	response to abiotic stimulus	GO:0009628	1128	21031	1	1	96	9	0.0482937	0.0482937	90	16	1	1	97	7	1	1	93	9
GO:BP	adenylate cyclase-inhibiting G protein-coupled receptor signaling pathway	GO:0007193	79	21031	1	1	-1	-1	0.0512003	0.0512003	90	5	1	1	-1	-1	1	1	93	1
GO:BP	regulation of monoatomic ion transport	GO:0043269	451	21031	1	1	96	2	0.0523521	0.0523521	90	10	1	1	97	5	1	1	93	3
GO:BP	cell surface receptor signaling pathway	GO:0007166	2799	21031	1	1	96	25	0.0627143	0.0627143	90	27	1	1	97	25	1	1	93	20
GO:BP	cell population proliferation	GO:0008283	2006	21031	1	1	96	19	0.591941	0.591941	90	20	0.0720865	0.0720865	97	23	1	1	93	14
GO:BP	signaling	GO:0023052	6447	21031	1	1	96	43	0.089991	0.089991	90	46	1	1	97	45	1	1	93	40
GO:BP	visual perception	GO:0007601	219	21031	1	1	-1	-1	0.0984789	0.0984789	90	7	1	1	97	4	1	1	93	2
GO:BP	telencephalon development	GO:0021537	279	21031	1	1	96	2	1	1	90	1	0.102748	0.102748	97	8	1	1	93	2
GO:BP	sensory perception of light stimulus	GO:0050953	222	21031	1	1	-1	-1	0.107346	0.107346	90	7	1	1	97	4	1	1	93	2
GO:BP	directional locomotion	GO:0033058	3	21031	1	1	-1	-1	0.123137	0.123137	90	2	1	1	-1	-1	1	1	-1	-1
GO:BP	cell communication	GO:0007154	6537	21031	1	1	96	43	0.131633	0.131633	90	46	0.573812	0.573812	97	47	1	1	93	40
GO:BP	regulation of biological quality	GO:0065008	2846	21031	1	1	96	16	1	1	90	23	0.131916	0.131916	97	28	1	1	93	14
GO:BP	sensory organ development	GO:0007423	610	21031	1	1	96	5	0.132534	0.132534	90	11	1	1	97	10	1	1	93	3
GO:BP	cellular response to glycoprotein	GO:1904588	3	21031	1	1	-1	-1	1	1	90	1	0.143121	0.143121	97	2	1	1	-1	-1
GO:BP	cell differentiation	GO:0030154	4366	21031	1	1	96	31	1	1	90	30	0.144837	0.144837	97	37	1	1	93	28
GO:BP	cellular developmental process	GO:0048869	4367	21031	1	1	96	31	1	1	90	30	0.145576	0.145576	97	37	1	1	93	28
GO:BP	detection of visible light	GO:0009584	53	21031	1	1	-1	-1	0.177786	0.177786	90	4	1	1	97	1	1	1	-1	-1
GO:BP	adenylate cyclase-modulating G protein-coupled receptor signaling pathway	GO:0007188	246	21031	1	1	96	1	0.204656	0.204656	90	7	1	1	97	3	1	1	93	2
GO:BP	detection of mechanical stimulus	GO:0050982	55	21031	1	1	-1	-1	0.205722	0.205722	90	4	1	1	97	1	1	1	-1	-1
GO:BP	signal release	GO:0023061	492	21031	1	1	96	1	1	1	90	8	0.207688	0.207688	97	10	1	1	93	3
GO:BP	positive regulation of signal transduction	GO:0009967	1561	21031	1	1	96	15	0.212575	0.212575	90	18	1	1	97	9	1	1	93	15
GO:BP	detection of light stimulus involved in sensory perception	GO:0050962	22	21031	1	1	-1	-1	0.250069	0.250069	90	3	1	1	97	1	1	1	-1	-1
GO:BP	detection of light stimulus involved in visual perception	GO:0050908	22	21031	1	1	-1	-1	0.250069	0.250069	90	3	1	1	97	1	1	1	-1	-1
GO:BP	positive regulation of response to stimulus	GO:0048584	2274	21031	1	1	96	16	1	1	90	19	1	1	97	16	0.274018	0.274018	93	23
GO:BP	neurogenesis	GO:0022008	1742	21031	1	1	96	17	0.27443	0.27443	90	19	1	1	97	18	1	1	93	10
GO:BP	regulation of cytosolic calcium ion concentration	GO:0051480	60	21031	1	1	96	1	0.289383	0.289383	90	4	1	1	97	2	1	1	93	1
GO:BP	response to stimulus	GO:0050896	8976	21031	1	1	96	53	0.325194	0.325194	90	56	1	1	97	50	0.561078	0.561078	93	57
GO:BP	import into cell	GO:0098657	923	21031	1	1	96	9	0.335714	0.335714	90	13	1	1	97	12	1	1	93	5
GO:BP	inorganic ion import across plasma membrane	GO:0099587	126	21031	1	1	-1	-1	0.473886	0.473886	90	5	0.672106	0.672106	97	5	1	1	93	2
GO:BP	inorganic cation import across plasma membrane	GO:0098659	126	21031	1	1	-1	-1	0.473886	0.473886	90	5	0.672106	0.672106	97	5	1	1	93	2
GO:BP	import across plasma membrane	GO:0098739	201	21031	1	1	96	1	0.513843	0.513843	90	6	1	1	97	5	1	1	93	2
GO:BP	integrin activation	GO:0033622	26	21031	1	1	-1	-1	1	1	-1	-1	0.520347	0.520347	97	3	1	1	-1	-1
GO:BP	detection of light stimulus	GO:0009583	70	21031	1	1	-1	-1	0.526685	0.526685	90	4	1	1	97	1	1	1	-1	-1
GO:BP	export from cell	GO:0140352	894	21031	1	1	96	2	1	1	90	9	0.527763	0.527763	97	13	1	1	93	4
GO:BP	regulation of cell population proliferation	GO:0042127	1683	21031	1	1	96	14	0.546015	0.546015	90	18	1	1	97	18	1	1	93	11
GO:BP	modulation of chemical synaptic transmission	GO:0050804	489	21031	1	1	96	4	0.55882	0.55882	90	9	1	1	97	7	1	1	93	4
GO:BP	regulation of trans-synaptic signaling	GO:0099177	490	21031	1	1	96	4	0.5673	0.5673	90	9	1	1	97	7	1	1	93	4
GO:BP	homeostatic process	GO:0042592	1712	21031	1	1	96	13	0.673217	0.673217	90	18	0.613658	0.613658	97	19	1	1	93	10
GO:BP	neuron differentiation	GO:0030182	1431	21031	1	1	96	13	1	1	90	13	0.617548	0.617548	97	17	1	1	93	6
GO:BP	positive regulation of monoatomic ion transport	GO:0043270	209	21031	1	1	96	2	0.633814	0.633814	90	6	1	1	97	2	1	1	93	2
GO:BP	pallium development	GO:0021543	194	21031	1	1	96	2	1	1	-1	-1	0.638442	0.638442	97	6	1	1	93	1
GO:BP	regulation of multicellular organismal process	GO:0051239	2955	21031	1	1	96	16	1	1	90	24	0.650925	0.650925	97	27	1	1	93	14
GO:BP	response to organic substance	GO:0010033	2637	21031	1	1	96	24	1	1	90	23	0.668771	0.668771	97	25	1	1	93	17
GO:BP	cellular response to oxygen-containing compound	GO:1901701	1179	21031	1	1	96	11	1	1	90	9	0.719405	0.719405	97	15	1	1	93	6
GO:BP	positive regulation of excitatory postsynaptic potential	GO:2000463	32	21031	1	1	-1	-1	0.78087	0.78087	90	3	1	1	-1	-1	1	1	-1	-1
GO:BP	bundle of His cell to Purkinje myocyte signaling	GO:0086028	7	21031	1	1	-1	-1	0.852388	0.852388	90	2	0.98984	0.98984	97	2	1	1	93	1
GO:BP	bundle of His cell action potential	GO:0086043	7	21031	1	1	-1	-1	0.852388	0.852388	90	2	0.98984	0.98984	97	2	1	1	93	1
GO:BP	adenylate cyclase-inhibiting serotonin receptor signaling pathway	GO:0007198	7	21031	1	1	-1	-1	0.852388	0.852388	90	2	1	1	-1	-1	1	1	-1	-1
GO:BP	regulation of atrial cardiac muscle cell membrane repolarization	GO:0060372	7	21031	1	1	-1	-1	0.852388	0.852388	90	2	1	1	97	1	1	1	93	1
GO:BP	regulation of transport	GO:0051049	1594	21031	1	1	96	11	0.864439	0.864439	90	17	1	1	97	11	1	1	93	9
GO:BP	regulation of G protein-coupled receptor signaling pathway	GO:0008277	145	21031	1	1	96	1	0.907105	0.907105	90	5	1	1	97	1	1	1	93	1
GO:BP	camera-type eye photoreceptor cell differentiation	GO:0060219	32	21031	1	1	96	1	1	1	90	1	0.972956	0.972956	97	3	1	1	-1	-1
GO:BP	chemical homeostasis	GO:0048878	1031	21031	1	1	96	9	0.980311	0.980311	90	13	1	1	97	12	1	1	93	8
GO:BP	positive regulation of axon extension involved in axon guidance	GO:0048842	7	21031	1	1	-1	-1	1	1	-1	-1	0.98984	0.98984	97	2	1	1	-1	-1
GO:BP	peripheral nervous system axon ensheathment	GO:0032292	29	21031	1	1	-1	-1	1	1	-1	-1	1	1	97	1	1	1	-1	-1
GO:BP	regulation of chondrocyte differentiation	GO:0032330	53	21031	1	1	-1	-1	1	1	-1	-1	1	1	97	1	1	1	93	1
GO:BP	negative regulation of chondrocyte differentiation	GO:0032331	25	21031	1	1	-1	-1	1	1	-1	-1	1	1	97	1	1	1	93	1
GO:BP	response to estradiol	GO:0032355	117	21031	1	1	96	3	1	1	-1	-1	1	1	97	1	1	1	-1	-1
GO:BP	regulation of transporter activity	GO:0032409	213	21031	1	1	96	2	1	1	90	3	1	1	97	1	1	1	-1	-1
GO:BP	regulation of monoatomic ion transmembrane transporter activity	GO:0032412	192	21031	1	1	-1	-1	1	1	90	3	1	1	97	1	1	1	-1	-1
GO:BP	regulation of mismatch repair	GO:0032423	4	21031	1	1	-1	-1	1	1	-1	-1	1	1	97	1	1	1	-1	-1
GO:BP	positive regulation of mismatch repair	GO:0032425	3	21031	1	1	-1	-1	1	1	-1	-1	1	1	97	1	1	1	-1	-1
GO:BP	protein modification by small protein conjugation	GO:0032446	858	21031	1	1	96	8	1	1	90	3	1	1	97	6	1	1	93	6
GO:BP	regulation of type I interferon production	GO:0032479	122	21031	1	1	-1	-1	1	1	90	1	1	1	97	2	1	1	-1	-1
GO:BP	positive regulation of type I interferon production	GO:0032481	73	21031	1	1	-1	-1	1	1	90	1	1	1	97	2	1	1	-1	-1
GO:BP	axon ensheathment in central nervous system	GO:0032291	25	21031	1	1	-1	-1	1	1	90	1	1	1	97	1	1	1	93	1
GO:BP	response to lipopolysaccharide	GO:0032496	336	21031	1	1	96	2	1	1	90	1	1	1	97	1	1	1	93	2
GO:BP	response to retinoic acid	GO:0032526	110	21031	1	1	96	1	1	1	90	2	1	1	97	2	1	1	93	1
GO:BP	regulation of cellular component size	GO:0032535	376	21031	1	1	96	4	1	1	-1	-1	1	1	97	3	1	1	93	2
GO:BP	type I interferon production	GO:0032606	122	21031	1	1	-1	-1	1	1	90	1	1	1	97	2	1	1	-1	-1
GO:BP	interferon-beta production	GO:0032608	59	21031	1	1	-1	-1	1	1	90	1	1	1	97	1	1	1	-1	-1
GO:BP	type II interferon production	GO:0032609	118	21031	1	1	96	1	1	1	-1	-1	1	1	97	1	1	1	-1	-1
GO:BP	interleukin-17 production	GO:0032620	40	21031	1	1	-1	-1	1	1	-1	-1	1	1	97	1	1	1	-1	-1
GO:BP	interleukin-2 production	GO:0032623	63	21031	1	1	96	1	1	1	-1	-1	1	1	97	1	1	1	-1	-1
GO:BP	interleukin-6 production	GO:0032635	151	21031	1	1	96	2	1	1	90	2	1	1	97	1	1	1	93	1
GO:BP	tumor necrosis factor production	GO:0032640	163	21031	1	1	96	3	1	1	90	1	1	1	97	1	1	1	93	2
GO:BP	regulation of interferon-beta production	GO:0032648	59	21031	1	1	-1	-1	1	1	90	1	1	1	97	1	1	1	-1	-1
GO:BP	regulation of type II interferon production	GO:0032649	117	21031	1	1	96	1	1	1	-1	-1	1	1	97	1	1	1	-1	-1
GO:BP	multicellular organism reproduction	GO:0032504	978	21031	1	1	96	9	1	1	90	8	1	1	97	5	1	1	93	7
GO:BP	methylation	GO:0032259	268	21031	1	1	96	1	1	1	-1	-1	1	1	97	1	1	1	-1	-1
GO:BP	regulation of actin filament bundle assembly	GO:0032231	103	21031	1	1	96	1	1	1	-1	-1	1	1	97	1	1	1	-1	-1
GO:BP	positive regulation of synaptic transmission, cholinergic	GO:0032224	6	21031	1	1	-1	-1	1	1	-1	-1	1	1	97	1	1	1	-1	-1
GO:BP	negative regulation of protein ubiquitination	GO:0031397	76	21031	1	1	96	1	1	1	-1	-1	1	1	97	1	1	1	-1	-1
GO:BP	regulation of protein modification process	GO:0031399	1229	21031	1	1	96	13	1	1	90	4	1	1	97	6	1	1	93	4
GO:BP	negative regulation of protein modification process	GO:0031400	400	21031	1	1	96	8	1	1	90	1	1	1	97	4	1	1	-1	-1
GO:BP	positive regulation of protein modification process	GO:0031401	787	21031	1	1	96	9	1	1	90	4	1	1	97	3	1	1	93	4
GO:BP	heterochromatin formation	GO:0031507	112	21031	1	1	96	3	1	1	-1	-1	1	1	97	1	1	1	93	2
GO:BP	brain-derived neurotrophic factor receptor signaling pathway	GO:0031547	7	21031	1	1	-1	-1	1	1	-1	-1	1	1	97	1	1	1	-1	-1
GO:BP	membrane raft organization	GO:0031579	25	21031	1	1	-1	-1	1	1	-1	-1	1	1	97	1	1	1	93	1
GO:BP	cell-substrate adhesion	GO:0031589	351	21031	1	1	96	3	1	1	90	1	1	1	97	3	1	1	93	5
GO:BP	regulation of nervous system process	GO:0031644	116	21031	1	1	96	1	1	1	90	4	1	1	97	1	1	1	-1	-1
GO:BP	regulation of protein stability	GO:0031647	324	21031	1	1	96	4	1	1	90	3	1	1	97	2	1	1	93	1
GO:BP	protein destabilization	GO:0031648	51	21031	1	1	-1	-1	1	1	-1	-1	1	1	97	1	1	1	93	1
GO:BP	response to nutrient levels	GO:0031667	496	21031	1	1	96	5	1	1	90	1	1	1	97	2	1	1	93	1
GO:BP	cellular response to extracellular stimulus	GO:0031668	274	21031	1	1	96	1	1	1	-1	-1	1	1	97	1	1	1	-1	-1
GO:BP	response to corticosteroid	GO:0031960	154	21031	1	1	96	3	1	1	90	2	1	1	97	1	1	1	-1	-1
GO:BP	positive regulation of insulin secretion	GO:0032024	87	21031	1	1	96	1	1	1	90	1	1	1	97	1	1	1	93	2
GO:BP	bleb assembly	GO:0032060	11	21031	1	1	-1	-1	1	1	-1	-1	1	1	97	1	1	1	-1	-1
GO:BP	positive regulation of protein binding	GO:0032092	59	21031	1	1	96	3	1	1	90	1	1	1	97	1	1	1	93	1
GO:BP	response to food	GO:0032094	35	21031	1	1	-1	-1	1	1	-1	-1	1	1	97	1	1	1	-1	-1
GO:BP	regulation of response to food	GO:0032095	14	21031	1	1	-1	-1	1	1	-1	-1	1	1	97	1	1	1	-1	-1
GO:BP	regulation of response to external stimulus	GO:0032101	1077	21031	1	1	96	4	1	1	90	2	1	1	97	10	1	1	93	4
GO:BP	negative regulation of response to external stimulus	GO:0032102	405	21031	1	1	96	4	1	1	90	1	1	1	97	5	1	1	93	2
GO:BP	positive regulation of response to external stimulus	GO:0032103	609	21031	1	1	-1	-1	1	1	90	1	1	1	97	5	1	1	93	2
GO:BP	regulation of response to extracellular stimulus	GO:0032104	28	21031	1	1	-1	-1	1	1	-1	-1	1	1	97	1	1	1	-1	-1
GO:BP	regulation of response to nutrient levels	GO:0032107	28	21031	1	1	-1	-1	1	1	-1	-1	1	1	97	1	1	1	-1	-1
GO:BP	regulation of synaptic transmission, cholinergic	GO:0032222	8	21031	1	1	-1	-1	1	1	-1	-1	1	1	97	1	1	1	-1	-1
GO:BP	regulation of interleukin-17 production	GO:0032660	40	21031	1	1	-1	-1	1	1	-1	-1	1	1	97	1	1	1	-1	-1
GO:BP	regulation of protein ubiquitination	GO:0031396	199	21031	1	1	96	2	1	1	90	1	1	1	97	1	1	1	-1	-1
GO:BP	regulation of interleukin-2 production	GO:0032663	63	21031	1	1	96	1	1	1	-1	-1	1	1	97	1	1	1	-1	-1
GO:BP	regulation of tumor necrosis factor production	GO:0032680	163	21031	1	1	96	3	1	1	90	1	1	1	97	1	1	1	93	2
GO:BP	tetrapyrrole metabolic process	GO:0033013	64	21031	1	1	96	1	1	1	90	2	1	1	97	1	1	1	93	1
GO:BP	macromolecule localization	GO:0033036	3210	21031	1	1	96	21	1	1	90	13	1	1	97	12	1	1	93	14
GO:BP	regulation of organelle organization	GO:0033043	1173	21031	1	1	96	12	1	1	90	3	1	1	97	6	1	1	93	7
GO:BP	regulation of chromosome organization	GO:0033044	248	21031	1	1	96	4	1	1	-1	-1	1	1	97	1	1	1	93	3
GO:BP	regulation of sister chromatid segregation	GO:0033045	104	21031	1	1	96	2	1	1	-1	-1	1	1	97	1	1	1	93	1
GO:BP	regulation of purine nucleotide catabolic process	GO:0033121	52	21031	1	1	96	2	1	1	90	1	1	1	97	1	1	1	93	1
GO:BP	positive regulation of purine nucleotide catabolic process	GO:0033123	22	21031	1	1	-1	-1	1	1	90	1	1	1	97	1	1	1	-1	-1
GO:BP	regulation of peptidyl-serine phosphorylation	GO:0033135	127	21031	1	1	96	1	1	1	-1	-1	1	1	97	1	1	1	-1	-1
GO:BP	positive regulation of peptidyl-serine phosphorylation	GO:0033138	95	21031	1	1	-1	-1	1	1	-1	-1	1	1	97	1	1	1	-1	-1
GO:BP	calcineurin-NFAT signaling cascade	GO:0033173	45	21031	1	1	-1	-1	1	1	90	1	1	1	97	1	1	1	-1	-1
GO:BP	response to ATP	GO:0033198	34	21031	1	1	-1	-1	1	1	-1	-1	1	1	97	1	1	1	-1	-1
GO:BP	muscle cell proliferation	GO:0033002	208	21031	1	1	96	2	1	1	90	2	1	1	97	2	1	1	93	1
GO:BP	regulation of amine metabolic process	GO:0033238	31	21031	1	1	96	1	1	1	-1	-1	1	1	97	1	1	1	-1	-1
GO:BP	protein localization to organelle	GO:0033365	1184	21031	1	1	96	5	1	1	90	3	1	1	97	2	1	1	93	3
GO:BP	protein localization to secretory granule	GO:0033366	4	21031	1	1	-1	-1	1	1	-1	-1	1	1	97	1	1	1	-1	-1
GO:BP	carbohydrate homeostasis	GO:0033500	256	21031	1	1	96	4	1	1	90	3	1	1	97	3	1	1	93	2
GO:BP	cellular response to stress	GO:0033554	1770	21031	1	1	96	13	1	1	90	1	1	1	97	7	1	1	93	10
GO:BP	multicellular organismal response to stress	GO:0033555	95	21031	1	1	-1	-1	1	1	90	1	1	1	97	2	1	1	-1	-1
GO:BP	positive regulation of dopamine secretion	GO:0033603	6	21031	1	1	-1	-1	1	1	-1	-1	1	1	97	1	1	1	-1	-1
GO:BP	positive regulation of catecholamine secretion	GO:0033605	10	21031	1	1	-1	-1	1	1	-1	-1	1	1	97	1	1	1	-1	-1
GO:BP	regulation of integrin activation	GO:0033623	17	21031	1	1	-1	-1	1	1	-1	-1	1	1	97	2	1	1	-1	-1
GO:BP	negative regulation of integrin activation	GO:0033624	3	21031	1	1	-1	-1	1	1	-1	-1	1	1	97	1	1	1	-1	-1
GO:BP	positive regulation of integrin activation	GO:0033625	11	21031	1	1	-1	-1	1	1	-1	-1	1	1	97	1	1	1	-1	-1
GO:BP	positive regulation of integrin activation by cell surface receptor linked signal transduction	GO:0033626	2	21031	1	1	-1	-1	1	1	-1	-1	1	1	97	1	1	1	-1	-1
GO:BP	Leydig cell differentiation	GO:0033327	11	21031	1	1	-1	-1	1	1	-1	-1	1	1	97	1	1	1	-1	-1
GO:BP	cellular anatomical entity morphogenesis	GO:0032989	785	21031	1	1	96	5	1	1	90	4	1	1	97	8	1	1	93	3
GO:BP	regulation of actin filament-based process	GO:0032970	376	21031	1	1	96	5	1	1	90	1	1	1	97	4	1	1	93	1
GO:BP	regulation of actin cytoskeleton organization	GO:0032956	334	21031	1	1	96	4	1	1	-1	-1	1	1	97	4	1	1	-1	-1
GO:BP	negative regulation of type II interferon production	GO:0032689	42	21031	1	1	-1	-1	1	1	-1	-1	1	1	97	1	1	1	-1	-1
GO:BP	negative regulation of interleukin-17 production	GO:0032700	15	21031	1	1	-1	-1	1	1	-1	-1	1	1	97	1	1	1	-1	-1
GO:BP	negative regulation of interleukin-2 production	GO:0032703	27	21031	1	1	-1	-1	1	1	-1	-1	1	1	97	1	1	1	-1	-1
GO:BP	positive regulation of interferon-beta production	GO:0032728	42	21031	1	1	-1	-1	1	1	90	1	1	1	97	1	1	1	-1	-1
GO:BP	positive regulation of interleukin-6 production	GO:0032755	97	21031	1	1	96	2	1	1	90	2	1	1	97	1	1	1	93	1
GO:BP	positive regulation of tumor necrosis factor production	GO:0032760	101	21031	1	1	96	3	1	1	90	1	1	1	97	1	1	1	93	1
GO:BP	RNA biosynthetic process	GO:0032774	3601	21031	1	1	96	26	1	1	90	10	1	1	97	25	1	1	93	19
GO:BP	positive regulation of ATP-dependent activity	GO:0032781	40	21031	1	1	-1	-1	1	1	-1	-1	1	1	97	1	1	1	-1	-1
GO:BP	monocarboxylic acid metabolic process	GO:0032787	629	21031	1	1	96	5	1	1	90	5	1	1	97	5	1	1	93	5
GO:BP	positive regulation of CREB transcription factor activity	GO:0032793	14	21031	1	1	-1	-1	1	1	-1	-1	1	1	97	1	1	1	-1	-1
GO:BP	glomerulus development	GO:0032835	69	21031	1	1	96	1	1	1	-1	-1	1	1	97	2	1	1	-1	-1
GO:BP	glomerular basement membrane development	GO:0032836	11	21031	1	1	-1	-1	1	1	-1	-1	1	1	97	1	1	1	-1	-1
GO:BP	response to insulin	GO:0032868	263	21031	1	1	96	2	1	1	-1	-1	1	1	97	2	1	1	93	1
GO:BP	cellular response to insulin stimulus	GO:0032869	200	21031	1	1	96	1	1	1	-1	-1	1	1	97	2	1	1	93	1
GO:BP	regulation of localization	GO:0032879	2018	21031	1	1	96	11	1	1	90	17	1	1	97	11	1	1	93	13
GO:BP	regulation of protein localization	GO:0032880	889	21031	1	1	96	4	1	1	90	5	1	1	97	4	1	1	93	6
GO:BP	transforming growth factor beta1 production	GO:0032905	17	21031	1	1	-1	-1	1	1	-1	-1	1	1	97	1	1	1	93	1
GO:BP	regulation of transforming growth factor beta1 production	GO:0032908	14	21031	1	1	-1	-1	1	1	-1	-1	1	1	97	1	1	1	-1	-1
GO:BP	positive regulation of transforming growth factor beta1 production	GO:0032914	8	21031	1	1	-1	-1	1	1	-1	-1	1	1	97	1	1	1	-1	-1
GO:BP	circadian regulation of gene expression	GO:0032922	70	21031	1	1	96	2	1	1	-1	-1	1	1	97	2	1	1	93	1
GO:BP	secretion by cell	GO:0032940	827	21031	1	1	96	2	1	1	90	9	1	1	97	11	1	1	93	4
GO:BP	mononuclear cell proliferation	GO:0032943	315	21031	1	1	96	5	1	1	-1	-1	1	1	97	1	1	1	-1	-1
GO:BP	regulation of mononuclear cell proliferation	GO:0032944	241	21031	1	1	96	1	1	1	-1	-1	1	1	97	1	1	1	-1	-1
GO:BP	negative regulation of mononuclear cell proliferation	GO:0032945	88	21031	1	1	-1	-1	1	1	-1	-1	1	1	97	1	1	1	-1	-1
GO:BP	regulation of interleukin-6 production	GO:0032675	151	21031	1	1	96	2	1	1	90	2	1	1	97	1	1	1	93	1
GO:BP	positive regulation of defense response	GO:0031349	471	21031	1	1	-1	-1	1	1	90	1	1	1	97	2	1	1	93	2
GO:BP	negative regulation of defense response	GO:0031348	247	21031	1	1	96	3	1	1	90	1	1	1	97	3	1	1	93	1
GO:BP	regulation of defense response	GO:0031347	768	21031	1	1	96	3	1	1	90	1	1	1	97	4	1	1	93	4
GO:BP	peptide hormone secretion	GO:0030072	249	21031	1	1	96	1	1	1	90	3	1	1	97	4	1	1	93	2
GO:BP	insulin secretion	GO:0030073	205	21031	1	1	96	1	1	1	90	3	1	1	97	3	1	1	93	2
GO:BP	hemopoiesis	GO:0030097	965	21031	1	1	96	10	1	1	90	2	1	1	97	8	1	1	93	3
GO:BP	lymphocyte differentiation	GO:0030098	434	21031	1	1	96	5	1	1	90	2	1	1	97	5	1	1	93	3
GO:BP	myeloid cell differentiation	GO:0030099	437	21031	1	1	96	5	1	1	-1	-1	1	1	97	2	1	1	93	1
GO:BP	regulation of endocytosis	GO:0030100	283	21031	1	1	96	3	1	1	90	2	1	1	97	1	1	1	-1	-1
GO:BP	regulation of cell adhesion	GO:0030155	778	21031	1	1	96	8	1	1	90	2	1	1	97	7	1	1	93	3
GO:BP	protein catabolic process	GO:0030163	968	21031	1	1	96	10	1	1	90	5	1	1	97	4	1	1	93	7
GO:BP	platelet activation	GO:0030168	135	21031	1	1	96	1	1	1	90	1	1	1	97	1	1	1	93	1
GO:BP	B cell differentiation	GO:0030183	159	21031	1	1	96	1	1	1	90	1	1	1	97	3	1	1	93	2
GO:BP	regulation of mitotic metaphase/anaphase transition	GO:0030071	90	21031	1	1	96	2	1	1	-1	-1	1	1	97	1	1	1	93	1
GO:BP	regulation of blood coagulation	GO:0030193	69	21031	1	1	96	1	1	1	-1	-1	1	1	97	2	1	1	-1	-1
GO:BP	collagen fibril organization	GO:0030199	65	21031	1	1	96	1	1	1	-1	-1	1	1	97	2	1	1	93	3
GO:BP	keratinocyte differentiation	GO:0030216	176	21031	1	1	-1	-1	1	1	-1	-1	1	1	97	1	1	1	-1	-1
GO:BP	T cell differentiation	GO:0030217	308	21031	1	1	96	5	1	1	90	1	1	1	97	2	1	1	93	1
GO:BP	erythrocyte differentiation	GO:0030218	133	21031	1	1	96	1	1	1	-1	-1	1	1	97	1	1	1	-1	-1
GO:BP	macrophage differentiation	GO:0030225	63	21031	1	1	-1	-1	1	1	-1	-1	1	1	97	1	1	1	-1	-1
GO:BP	myofibril assembly	GO:0030239	70	21031	1	1	96	1	1	1	90	1	1	1	97	1	1	1	-1	-1
GO:BP	maintenance of gastrointestinal epithelium	GO:0030277	23	21031	1	1	96	1	1	1	-1	-1	1	1	97	1	1	1	-1	-1
GO:BP	regulation of ossification	GO:0030278	122	21031	1	1	-1	-1	1	1	90	1	1	1	97	2	1	1	93	1
GO:BP	bone mineralization	GO:0030282	126	21031	1	1	-1	-1	1	1	90	2	1	1	97	1	1	1	93	1
GO:BP	positive regulation of cell growth	GO:0030307	164	21031	1	1	-1	-1	1	1	90	2	1	1	97	2	1	1	93	1
GO:BP	negative regulation of cell growth	GO:0030308	190	21031	1	1	96	1	1	1	-1	-1	1	1	97	1	1	1	-1	-1
GO:BP	negative regulation of blood coagulation	GO:0030195	49	21031	1	1	96	1	1	1	-1	-1	1	1	97	2	1	1	-1	-1
GO:BP	insulin processing	GO:0030070	8	21031	1	1	-1	-1	1	1	-1	-1	1	1	97	1	1	1	-1	-1
GO:BP	actin filament-based movement	GO:0030048	129	21031	1	1	-1	-1	1	1	90	2	1	1	97	1	1	1	93	2
GO:BP	contractile actin filament bundle assembly	GO:0030038	107	21031	1	1	96	2	1	1	-1	-1	1	1	97	1	1	1	93	1
GO:BP	regulation of cell-cell adhesion	GO:0022407	477	21031	1	1	96	5	1	1	90	2	1	1	97	3	1	1	-1	-1
GO:BP	negative regulation of cell-cell adhesion	GO:0022408	189	21031	1	1	96	2	1	1	-1	-1	1	1	97	2	1	1	-1	-1
GO:BP	positive regulation of cell-cell adhesion	GO:0022409	318	21031	1	1	96	4	1	1	90	2	1	1	97	1	1	1	-1	-1
GO:BP	cellular process involved in reproduction in multicellular organism	GO:0022412	479	21031	1	1	96	4	1	1	90	3	1	1	97	1	1	1	93	2
GO:BP	reproductive process	GO:0022414	1541	21031	1	1	96	10	1	1	90	11	1	1	97	8	1	1	93	14
GO:BP	digestive system process	GO:0022600	105	21031	1	1	96	2	1	1	-1	-1	1	1	97	1	1	1	-1	-1
GO:BP	ovulation cycle process	GO:0022602	50	21031	1	1	-1	-1	1	1	-1	-1	1	1	97	1	1	1	93	1
GO:BP	regulation of anatomical structure morphogenesis	GO:0022603	838	21031	1	1	96	6	1	1	90	4	1	1	97	5	1	1	93	5
GO:BP	regulation of cell morphogenesis	GO:0022604	245	21031	1	1	96	1	1	1	90	1	1	1	97	1	1	1	93	1
GO:BP	cellular component assembly	GO:0022607	4684	21031	1	1	96	21	1	1	90	18	1	1	97	17	1	1	93	18
GO:BP	gland morphogenesis	GO:0022612	129	21031	1	1	96	1	1	1	-1	-1	1	1	97	2	1	1	-1	-1
GO:BP	regulation of transmembrane transporter activity	GO:0022898	200	21031	1	1	-1	-1	1	1	90	3	1	1	97	1	1	1	-1	-1
GO:BP	signal transduction involved in regulation of gene expression	GO:0023019	23	21031	1	1	-1	-1	1	1	90	1	1	1	97	1	1	1	-1	-1
GO:BP	positive regulation of signaling	GO:0023056	1778	21031	1	1	96	16	1	1	90	18	1	1	97	13	1	1	93	18
GO:BP	intracellular monoatomic cation homeostasis	GO:0030003	529	21031	1	1	96	3	1	1	90	6	1	1	97	6	1	1	93	5
GO:BP	intracellular potassium ion homeostasis	GO:0030007	15	21031	1	1	-1	-1	1	1	-1	-1	1	1	97	1	1	1	-1	-1
GO:BP	maintenance of cell polarity	GO:0030011	18	21031	1	1	96	1	1	1	-1	-1	1	1	97	1	1	1	-1	-1
GO:BP	actin filament-based process	GO:0030029	805	21031	1	1	96	11	1	1	90	3	1	1	97	7	1	1	93	3
GO:BP	cell projection organization	GO:0030030	1613	21031	1	1	96	12	1	1	90	10	1	1	97	14	1	1	93	5
GO:BP	cell projection assembly	GO:0030031	598	21031	1	1	96	6	1	1	90	3	1	1	97	2	1	1	93	1
GO:BP	actin cytoskeleton organization	GO:0030036	717	21031	1	1	96	11	1	1	90	1	1	1	97	6	1	1	93	2
GO:BP	melanocyte differentiation	GO:0030318	25	21031	1	1	-1	-1	1	1	-1	-1	1	1	97	1	1	1	-1	-1
GO:BP	respiratory tube development	GO:0030323	197	21031	1	1	96	3	1	1	90	1	1	1	97	2	1	1	93	4
GO:BP	lung development	GO:0030324	193	21031	1	1	96	3	1	1	90	1	1	1	97	2	1	1	93	4
GO:BP	adrenal gland development	GO:0030325	28	21031	1	1	-1	-1	1	1	-1	-1	1	1	97	1	1	1	93	1
GO:BP	embryonic camera-type eye development	GO:0031076	37	21031	1	1	-1	-1	1	1	-1	-1	1	1	97	1	1	1	93	1
GO:BP	regeneration	GO:0031099	199	21031	1	1	96	3	1	1	90	1	1	1	97	4	1	1	-1	-1
GO:BP	animal organ regeneration	GO:0031100	68	21031	1	1	96	2	1	1	-1	-1	1	1	97	1	1	1	-1	-1
GO:BP	neuron projection regeneration	GO:0031102	57	21031	1	1	-1	-1	1	1	-1	-1	1	1	97	1	1	1	-1	-1
GO:BP	dendrite regeneration	GO:0031104	2	21031	1	1	-1	-1	1	1	-1	-1	1	1	97	1	1	1	-1	-1
GO:BP	sister chromatid biorientation	GO:0031134	3	21031	1	1	-1	-1	1	1	-1	-1	1	1	97	1	1	1	-1	-1
GO:BP	neuron projection development	GO:0031175	1014	21031	1	1	96	8	1	1	90	7	1	1	97	11	1	1	93	5
GO:BP	biomineral tissue development	GO:0031214	179	21031	1	1	-1	-1	1	1	90	2	1	1	97	1	1	1	93	1
GO:BP	lymphocyte costimulation	GO:0031294	50	21031	1	1	-1	-1	1	1	-1	-1	1	1	97	1	1	1	-1	-1
GO:BP	T cell costimulation	GO:0031295	48	21031	1	1	-1	-1	1	1	-1	-1	1	1	97	1	1	1	-1	-1
GO:BP	regulation of cellular metabolic process	GO:0031323	6673	21031	1	1	96	43	1	1	90	18	1	1	97	36	1	1	93	31
GO:BP	negative regulation of cellular metabolic process	GO:0031324	3226	21031	1	1	96	27	1	1	90	10	1	1	97	16	1	1	93	8
GO:BP	regulation of cellular biosynthetic process	GO:0031326	5781	21031	1	1	96	38	1	1	90	17	1	1	97	31	1	1	93	25
GO:BP	negative regulation of cellular biosynthetic process	GO:0031327	2824	21031	1	1	96	23	1	1	90	10	1	1	97	14	1	1	93	7
GO:BP	positive regulation of cellular biosynthetic process	GO:0031328	2685	21031	1	1	96	24	1	1	90	11	1	1	97	20	1	1	93	13
GO:BP	regulation of cellular catabolic process	GO:0031329	687	21031	1	1	96	8	1	1	90	2	1	1	97	2	1	1	93	3
GO:BP	negative regulation of cellular catabolic process	GO:0031330	222	21031	1	1	96	1	1	1	-1	-1	1	1	97	1	1	1	93	2
GO:BP	positive regulation of cellular catabolic process	GO:0031331	332	21031	1	1	96	3	1	1	90	2	1	1	97	1	1	1	-1	-1
GO:BP	negative regulation of protein-containing complex assembly	GO:0031333	148	21031	1	1	96	1	1	1	90	1	1	1	97	1	1	1	93	1
GO:BP	positive regulation of protein-containing complex assembly	GO:0031334	199	21031	1	1	96	2	1	1	90	2	1	1	97	1	1	1	93	1
GO:BP	regulation of sulfur amino acid metabolic process	GO:0031335	2	21031	1	1	-1	-1	1	1	-1	-1	1	1	97	1	1	1	-1	-1
GO:BP	regulation of cell projection organization	GO:0031344	667	21031	1	1	96	8	1	1	90	2	1	1	97	6	1	1	93	1
GO:BP	negative regulation of cell projection organization	GO:0031345	192	21031	1	1	96	4	1	1	-1	-1	1	1	97	2	1	1	93	1
GO:BP	positive regulation of cell projection organization	GO:0031346	357	21031	1	1	96	2	1	1	90	2	1	1	97	4	1	1	-1	-1
GO:BP	actomyosin structure organization	GO:0031032	204	21031	1	1	96	4	1	1	90	1	1	1	97	2	1	1	93	1
GO:BP	negative regulation of kinase activity	GO:0033673	159	21031	1	1	96	5	1	1	-1	-1	1	1	97	2	1	1	-1	-1
GO:BP	endocrine pancreas development	GO:0031018	47	21031	1	1	-1	-1	1	1	-1	-1	1	1	97	1	1	1	-1	-1
GO:BP	hindbrain development	GO:0030902	161	21031	1	1	96	3	1	1	90	3	1	1	97	2	1	1	93	1
GO:BP	prenylated protein catabolic process	GO:0030327	3	21031	1	1	-1	-1	1	1	-1	-1	1	1	97	1	1	1	-1	-1
GO:BP	prenylcysteine catabolic process	GO:0030328	2	21031	1	1	-1	-1	1	1	-1	-1	1	1	97	1	1	1	-1	-1
GO:BP	prenylcysteine metabolic process	GO:0030329	2	21031	1	1	-1	-1	1	1	-1	-1	1	1	97	1	1	1	-1	-1
GO:BP	regulation of cell migration	GO:0030334	934	21031	1	1	96	9	1	1	90	4	1	1	97	5	1	1	93	2
GO:BP	positive regulation of cell migration	GO:0030335	540	21031	1	1	96	5	1	1	90	1	1	1	97	4	1	1	93	1
GO:BP	negative regulation of cell migration	GO:0030336	285	21031	1	1	96	4	1	1	90	1	1	1	97	2	1	1	93	1
GO:BP	fructose 1,6-bisphosphate metabolic process	GO:0030388	9	21031	1	1	-1	-1	1	1	-1	-1	1	1	97	1	1	1	-1	-1
GO:BP	fructosamine metabolic process	GO:0030389	2	21031	1	1	-1	-1	1	1	-1	-1	1	1	97	1	1	1	-1	-1
GO:BP	fructosamine catabolic process	GO:0030392	1	21031	1	1	-1	-1	1	1	-1	-1	1	1	97	1	1	1	-1	-1
GO:BP	regulation of bone mineralization	GO:0030500	80	21031	1	1	-1	-1	1	1	90	1	1	1	97	1	1	1	93	1
GO:BP	negative regulation of transforming growth factor beta receptor signaling pathway	GO:0030512	94	21031	1	1	96	3	1	1	-1	-1	1	1	97	2	1	1	-1	-1
GO:BP	regulation of axon extension	GO:0030516	96	21031	1	1	96	1	1	1	-1	-1	1	1	97	2	1	1	-1	-1
GO:BP	intracellular receptor signaling pathway	GO:0030522	362	21031	1	1	96	7	1	1	90	4	1	1	97	3	1	1	93	1
GO:BP	adult behavior	GO:0030534	149	21031	1	1	96	1	1	1	90	3	1	1	97	4	1	1	93	1
GO:BP	male genitalia development	GO:0030539	24	21031	1	1	-1	-1	1	1	-1	-1	1	1	97	1	1	1	-1	-1
GO:BP	leukocyte chemotaxis	GO:0030595	237	21031	1	1	96	1	1	1	90	1	1	1	97	1	1	1	93	1
GO:BP	regulation of cellular pH	GO:0030641	95	21031	1	1	-1	-1	1	1	-1	-1	1	1	97	1	1	1	-1	-1
GO:BP	regulation of nucleotide catabolic process	GO:0030811	52	21031	1	1	96	2	1	1	90	1	1	1	97	1	1	1	93	1
GO:BP	positive regulation of nucleotide catabolic process	GO:0030813	22	21031	1	1	-1	-1	1	1	90	1	1	1	97	1	1	1	-1	-1
GO:BP	regulation of actin filament length	GO:0030832	157	21031	1	1	96	3	1	1	-1	-1	1	1	97	1	1	1	-1	-1
GO:BP	prostate gland development	GO:0030850	51	21031	1	1	-1	-1	1	1	-1	-1	1	1	97	1	1	1	93	1
GO:BP	epithelial cell differentiation	GO:0030855	740	21031	1	1	96	8	1	1	90	5	1	1	97	4	1	1	93	2
GO:BP	forebrain development	GO:0030900	417	21031	1	1	96	4	1	1	90	2	1	1	97	8	1	1	93	3
GO:BP	midbrain development	GO:0030901	92	21031	1	1	96	3	1	1	-1	-1	1	1	97	1	1	1	93	1
GO:BP	pancreas development	GO:0031016	79	21031	1	1	-1	-1	1	1	90	1	1	1	97	2	1	1	-1	-1
GO:BP	positive regulation of kinase activity	GO:0033674	292	21031	1	1	96	3	1	1	90	1	1	1	97	1	1	1	93	3
GO:BP	maintenance of sister chromatid cohesion	GO:0034086	13	21031	1	1	-1	-1	1	1	-1	-1	1	1	97	1	1	1	-1	-1
GO:BP	odontogenesis	GO:0042476	135	21031	1	1	96	1	1	1	90	1	1	1	97	3	1	1	93	1
GO:BP	mechanoreceptor differentiation	GO:0042490	77	21031	1	1	96	1	1	1	90	3	1	1	97	2	1	1	93	1
GO:BP	response to hydrogen peroxide	GO:0042542	100	21031	1	1	96	4	1	1	90	1	1	1	97	1	1	1	-1	-1
GO:BP	neuron maturation	GO:0042551	48	21031	1	1	-1	-1	1	1	-1	-1	1	1	97	1	1	1	-1	-1
GO:BP	myelination	GO:0042552	154	21031	1	1	-1	-1	1	1	90	4	1	1	97	2	1	1	93	1
GO:BP	retinol metabolic process	GO:0042572	53	21031	1	1	-1	-1	1	1	-1	-1	1	1	97	1	1	1	93	1
GO:BP	retinoic acid metabolic process	GO:0042573	33	21031	1	1	-1	-1	1	1	-1	-1	1	1	97	1	1	1	93	1
GO:BP	antigen processing and presentation of exogenous peptide antigen via MHC class I	GO:0042590	9	21031	1	1	-1	-1	1	1	-1	-1	1	1	97	1	1	1	-1	-1
GO:BP	glucose homeostasis	GO:0042593	255	21031	1	1	96	4	1	1	90	3	1	1	97	3	1	1	93	2
GO:BP	fear response	GO:0042596	49	21031	1	1	-1	-1	1	1	-1	-1	1	1	97	1	1	1	-1	-1
GO:BP	cellular response to water deprivation	GO:0042631	3	21031	1	1	-1	-1	1	1	-1	-1	1	1	97	1	1	1	-1	-1
GO:BP	odontogenesis of dentin-containing tooth	GO:0042475	95	21031	1	1	96	1	1	1	90	1	1	1	97	2	1	1	93	1
GO:BP	retinal cone cell differentiation	GO:0042670	14	21031	1	1	-1	-1	1	1	-1	-1	1	1	97	1	1	1	-1	-1
GO:BP	ovulation cycle	GO:0042698	72	21031	1	1	96	2	1	1	-1	-1	1	1	97	1	1	1	93	1
GO:BP	maternal behavior	GO:0042711	11	21031	1	1	-1	-1	1	1	-1	-1	1	1	97	1	1	1	-1	-1
GO:BP	regulation of circadian rhythm	GO:0042752	113	21031	1	1	96	2	1	1	-1	-1	1	1	97	1	1	1	93	1
GO:BP	regulation of sulfur metabolic process	GO:0042762	13	21031	1	1	-1	-1	1	1	-1	-1	1	1	97	1	1	1	-1	-1
GO:BP	amide transport	GO:0042886	319	21031	1	1	96	1	1	1	90	3	1	1	97	5	1	1	93	2
GO:BP	xenobiotic transport	GO:0042908	48	21031	1	1	-1	-1	1	1	-1	-1	1	1	97	1	1	1	-1	-1
GO:BP	glucoside transport	GO:0042946	3	21031	1	1	-1	-1	1	1	-1	-1	1	1	97	1	1	1	-1	-1
GO:BP	regulation of apoptotic process	GO:0042981	1463	21031	1	1	96	13	1	1	90	7	1	1	97	12	1	1	93	8
GO:BP	amyloid precursor protein metabolic process	GO:0042982	74	21031	1	1	-1	-1	1	1	90	2	1	1	97	3	1	1	-1	-1
GO:BP	amyloid precursor protein biosynthetic process	GO:0042983	14	21031	1	1	-1	-1	1	1	90	1	1	1	97	1	1	1	-1	-1
GO:BP	regulation of amyloid precursor protein biosynthetic process	GO:0042984	14	21031	1	1	-1	-1	1	1	90	1	1	1	97	1	1	1	-1	-1
GO:BP	muscle cell differentiation	GO:0042692	395	21031	1	1	96	3	1	1	90	3	1	1	97	6	1	1	93	3
GO:BP	inner ear morphogenesis	GO:0042472	111	21031	1	1	96	1	1	1	90	4	1	1	97	1	1	1	93	1
GO:BP	ear morphogenesis	GO:0042471	132	21031	1	1	96	1	1	1	90	4	1	1	97	1	1	1	93	1
GO:BP	eye photoreceptor cell development	GO:0042462	41	21031	1	1	-1	-1	1	1	90	2	1	1	97	2	1	1	-1	-1
GO:BP	cellular modified amino acid catabolic process	GO:0042219	29	21031	1	1	-1	-1	1	1	-1	-1	1	1	97	2	1	1	93	1
GO:BP	response to chemical	GO:0042221	3957	21031	1	1	96	28	1	1	90	29	1	1	97	30	1	1	93	21
GO:BP	tissue regeneration	GO:0042246	80	21031	1	1	96	1	1	1	90	1	1	1	97	1	1	1	-1	-1
GO:BP	homoiothermy	GO:0042309	2	21031	1	1	-1	-1	1	1	-1	-1	1	1	97	1	1	1	-1	-1
GO:BP	vasoconstriction	GO:0042310	88	21031	1	1	96	1	1	1	90	3	1	1	97	2	1	1	-1	-1
GO:BP	regulation of phosphorylation	GO:0042325	966	21031	1	1	96	11	1	1	90	3	1	1	97	7	1	1	93	4
GO:BP	positive regulation of phosphorylation	GO:0042327	630	21031	1	1	96	6	1	1	90	3	1	1	97	5	1	1	93	4
GO:BP	taxis	GO:0042330	465	21031	1	1	96	2	1	1	90	2	1	1	97	3	1	1	93	1
GO:BP	fat-soluble vitamin catabolic process	GO:0042363	12	21031	1	1	-1	-1	1	1	-1	-1	1	1	97	1	1	1	93	1
GO:BP	biogenic amine biosynthetic process	GO:0042401	37	21031	1	1	96	1	1	1	-1	-1	1	1	97	1	1	1	-1	-1
GO:BP	cellular biogenic amine catabolic process	GO:0042402	19	21031	1	1	-1	-1	1	1	-1	-1	1	1	97	1	1	1	-1	-1
GO:BP	thyroid hormone metabolic process	GO:0042403	29	21031	1	1	-1	-1	1	1	90	1	1	1	97	1	1	1	-1	-1
GO:BP	norepinephrine metabolic process	GO:0042415	14	21031	1	1	-1	-1	1	1	-1	-1	1	1	97	1	1	1	-1	-1
GO:BP	dopamine metabolic process	GO:0042417	41	21031	1	1	96	1	1	1	90	1	1	1	97	1	1	1	-1	-1
GO:BP	dopamine catabolic process	GO:0042420	9	21031	1	1	-1	-1	1	1	-1	-1	1	1	97	1	1	1	-1	-1
GO:BP	norepinephrine biosynthetic process	GO:0042421	7	21031	1	1	-1	-1	1	1	-1	-1	1	1	97	1	1	1	-1	-1
GO:BP	catecholamine biosynthetic process	GO:0042423	21	21031	1	1	96	1	1	1	-1	-1	1	1	97	1	1	1	-1	-1
GO:BP	catecholamine catabolic process	GO:0042424	10	21031	1	1	-1	-1	1	1	-1	-1	1	1	97	1	1	1	-1	-1
GO:BP	melanin biosynthetic process	GO:0042438	24	21031	1	1	-1	-1	1	1	-1	-1	1	1	97	1	1	1	-1	-1
GO:BP	ethanolamine-containing compound metabolic process	GO:0042439	7	21031	1	1	-1	-1	1	1	-1	-1	1	1	97	1	1	1	-1	-1
GO:BP	pigment metabolic process	GO:0042440	82	21031	1	1	96	1	1	1	90	1	1	1	97	1	1	1	93	1
GO:BP	hormone metabolic process	GO:0042445	242	21031	1	1	96	1	1	1	90	1	1	1	97	5	1	1	93	3
GO:BP	photoreceptor cell development	GO:0042461	56	21031	1	1	-1	-1	1	1	90	2	1	1	97	2	1	1	-1	-1
GO:BP	negative regulation of amyloid precursor protein biosynthetic process	GO:0042985	7	21031	1	1	-1	-1	1	1	-1	-1	1	1	97	1	1	1	-1	-1
GO:BP	amyloid precursor protein catabolic process	GO:0042987	56	21031	1	1	-1	-1	1	1	90	1	1	1	97	2	1	1	-1	-1
GO:BP	Golgi to plasma membrane protein transport	GO:0043001	39	21031	1	1	96	1	1	1	-1	-1	1	1	97	1	1	1	-1	-1
GO:BP	chordate embryonic development	GO:0043009	670	21031	1	1	96	6	1	1	90	5	1	1	97	2	1	1	93	6
GO:BP	positive regulation of DNA binding	GO:0043388	40	21031	1	1	-1	-1	1	1	-1	-1	1	1	97	1	1	1	-1	-1
GO:BP	regulation of protein binding	GO:0043393	135	21031	1	1	96	4	1	1	90	1	1	1	97	1	1	1	93	1
GO:BP	regulation of MAP kinase activity	GO:0043405	124	21031	1	1	96	2	1	1	-1	-1	1	1	97	1	1	1	93	2
GO:BP	negative regulation of MAP kinase activity	GO:0043407	43	21031	1	1	96	2	1	1	-1	-1	1	1	97	1	1	1	-1	-1
GO:BP	regulation of MAPK cascade	GO:0043408	643	21031	1	1	96	9	1	1	90	7	1	1	97	5	1	1	93	7
GO:BP	positive regulation of MAPK cascade	GO:0043410	461	21031	1	1	96	5	1	1	90	6	1	1	97	4	1	1	93	7
GO:BP	macromolecule modification	GO:0043412	3262	21031	1	1	96	24	1	1	90	14	1	1	97	21	1	1	93	15
GO:BP	macromolecule methylation	GO:0043414	178	21031	1	1	-1	-1	1	1	-1	-1	1	1	97	1	1	1	-1	-1
GO:BP	negative regulation of DNA-binding transcription factor activity	GO:0043433	147	21031	1	1	96	2	1	1	90	1	1	1	97	2	1	1	-1	-1
GO:BP	response to peptide hormone	GO:0043434	429	21031	1	1	96	4	1	1	90	3	1	1	97	4	1	1	93	3
GO:BP	oxoacid metabolic process	GO:0043436	921	21031	1	1	96	9	1	1	90	7	1	1	97	8	1	1	93	6
GO:BP	regulation of pentose-phosphate shunt	GO:0043456	7	21031	1	1	-1	-1	1	1	-1	-1	1	1	97	1	1	1	-1	-1
GO:BP	regulation of ATP-dependent activity	GO:0043462	65	21031	1	1	-1	-1	1	1	-1	-1	1	1	97	1	1	1	-1	-1
GO:BP	regulation of generation of precursor metabolites and energy	GO:0043467	138	21031	1	1	96	2	1	1	90	2	1	1	97	2	1	1	93	2
GO:BP	regulation of carbohydrate catabolic process	GO:0043470	61	21031	1	1	96	2	1	1	90	1	1	1	97	2	1	1	93	1
GO:BP	pigmentation	GO:0043473	115	21031	1	1	-1	-1	1	1	-1	-1	1	1	97	2	1	1	93	1
GO:BP	phosphatidylinositol 3-kinase/protein kinase B signal transduction	GO:0043491	293	21031	1	1	96	2	1	1	90	2	1	1	97	3	1	1	93	1
GO:BP	regulation of JUN kinase activity	GO:0043506	40	21031	1	1	-1	-1	1	1	-1	-1	1	1	97	1	1	1	93	1
GO:BP	negative regulation of JUN kinase activity	GO:0043508	13	21031	1	1	-1	-1	1	1	-1	-1	1	1	97	1	1	1	-1	-1
GO:BP	regulation of neuron apoptotic process	GO:0043523	229	21031	1	1	96	3	1	1	90	1	1	1	97	4	1	1	93	2
GO:BP	negative regulation of neuron apoptotic process	GO:0043524	161	21031	1	1	96	1	1	1	90	1	1	1	97	2	1	1	93	1
GO:BP	positive regulation of neuron apoptotic process	GO:0043525	55	21031	1	1	96	1	1	1	-1	-1	1	1	97	1	1	1	-1	-1
GO:BP	positive regulation of GTPase activity	GO:0043547	142	21031	1	1	96	2	1	1	90	1	1	1	97	1	1	1	-1	-1
GO:BP	mycotoxin metabolic process	GO:0043385	6	21031	1	1	-1	-1	1	1	-1	-1	1	1	97	1	1	1	93	1
GO:BP	cellular ketone metabolic process	GO:0042180	223	21031	1	1	96	2	1	1	-1	-1	1	1	97	1	1	1	93	3
GO:BP	CD8-positive, alpha-beta T cell differentiation	GO:0043374	16	21031	1	1	-1	-1	1	1	-1	-1	1	1	97	1	1	1	-1	-1
GO:BP	enucleate erythrocyte differentiation	GO:0043353	13	21031	1	1	-1	-1	1	1	-1	-1	1	1	97	1	1	1	-1	-1
GO:BP	camera-type eye development	GO:0043010	350	21031	1	1	96	3	1	1	90	5	1	1	97	7	1	1	93	1
GO:BP	peptide biosynthetic process	GO:0043043	752	21031	1	1	96	7	1	1	-1	-1	1	1	97	1	1	1	93	4
GO:BP	positive regulation of apoptotic process	GO:0043065	512	21031	1	1	96	4	1	1	90	4	1	1	97	2	1	1	93	3
GO:BP	negative regulation of apoptotic process	GO:0043066	881	21031	1	1	96	9	1	1	90	4	1	1	97	8	1	1	93	3
GO:BP	regulation of programmed cell death	GO:0043067	1506	21031	1	1	96	13	1	1	90	8	1	1	97	12	1	1	93	8
GO:BP	positive regulation of programmed cell death	GO:0043068	532	21031	1	1	96	4	1	1	90	5	1	1	97	2	1	1	93	3
GO:BP	negative regulation of programmed cell death	GO:0043069	907	21031	1	1	96	9	1	1	90	4	1	1	97	8	1	1	93	3
GO:BP	positive regulation of catalytic activity	GO:0043085	773	21031	1	1	96	8	1	1	90	6	1	1	97	3	1	1	93	4
GO:BP	negative regulation of catalytic activity	GO:0043086	396	21031	1	1	96	7	1	1	90	1	1	1	97	4	1	1	93	1
GO:BP	regulation of GTPase activity	GO:0043087	210	21031	1	1	96	2	1	1	90	1	1	1	97	3	1	1	93	1
GO:BP	cellular metabolic compound salvage	GO:0043094	33	21031	1	1	96	1	1	1	-1	-1	1	1	97	1	1	1	93	1
GO:BP	amino acid salvage	GO:0043102	7	21031	1	1	96	1	1	1	-1	-1	1	1	97	1	1	1	-1	-1
GO:BP	regulation of vascular permeability	GO:0043114	49	21031	1	1	-1	-1	1	1	-1	-1	1	1	97	1	1	1	-1	-1
GO:BP	stress fiber assembly	GO:0043149	107	21031	1	1	96	2	1	1	-1	-1	1	1	97	1	1	1	93	1
GO:BP	proteasome-mediated ubiquitin-dependent protein catabolic process	GO:0043161	400	21031	1	1	96	7	1	1	90	2	1	1	97	2	1	1	93	1
GO:BP	macromolecule metabolic process	GO:0043170	12170	21031	1	1	96	55	1	1	90	34	1	1	97	43	1	1	93	49
GO:BP	response to amino acid	GO:0043200	127	21031	1	1	96	1	1	1	90	1	1	1	97	2	1	1	93	1
GO:BP	response to external biotic stimulus	GO:0043207	1551	21031	1	1	96	8	1	1	90	5	1	1	97	6	1	1	93	7
GO:BP	regulation of protein-containing complex assembly	GO:0043254	417	21031	1	1	96	5	1	1	90	3	1	1	97	3	1	1	93	3
GO:BP	regulation of potassium ion transport	GO:0043266	94	21031	1	1	-1	-1	1	1	90	2	1	1	97	2	1	1	-1	-1
GO:BP	anoikis	GO:0043276	35	21031	1	1	-1	-1	1	1	-1	-1	1	1	97	1	1	1	-1	-1
GO:BP	response to morphine	GO:0043278	11	21031	1	1	-1	-1	1	1	-1	-1	1	1	97	1	1	1	-1	-1
GO:BP	response to alkaloid	GO:0043279	95	21031	1	1	96	1	1	1	90	1	1	1	97	1	1	1	-1	-1
GO:BP	CD4-positive, alpha-beta T cell differentiation	GO:0043367	94	21031	1	1	96	1	1	1	-1	-1	1	1	97	2	1	1	-1	-1
GO:BP	membrane docking	GO:0022406	90	21031	1	1	96	1	1	1	-1	-1	1	1	97	1	1	1	-1	-1
GO:BP	negative regulation of protein catabolic process	GO:0042177	110	21031	1	1	96	3	1	1	90	3	1	1	97	1	1	1	-1	-1
GO:BP	negative regulation of T cell proliferation	GO:0042130	72	21031	1	1	-1	-1	1	1	-1	-1	1	1	97	1	1	1	-1	-1
GO:BP	positive regulation of transmembrane transport	GO:0034764	210	21031	1	1	96	3	1	1	90	5	1	1	97	1	1	1	-1	-1
GO:BP	regulation of monoatomic ion transmembrane transport	GO:0034765	323	21031	1	1	96	2	1	1	90	7	1	1	97	3	1	1	93	1
GO:BP	positive regulation of monoatomic ion transmembrane transport	GO:0034767	151	21031	1	1	96	2	1	1	90	4	1	1	97	1	1	1	-1	-1
GO:BP	response to endoplasmic reticulum stress	GO:0034976	220	21031	1	1	96	2	1	1	-1	-1	1	1	97	1	1	1	93	2
GO:BP	cardiocyte differentiation	GO:0035051	149	21031	1	1	96	1	1	1	90	2	1	1	97	1	1	1	93	1
GO:BP	establishment or maintenance of apical/basal cell polarity	GO:0035088	57	21031	1	1	96	1	1	1	-1	-1	1	1	97	1	1	1	-1	-1
GO:BP	maintenance of apical/basal cell polarity	GO:0035090	11	21031	1	1	96	1	1	1	-1	-1	1	1	97	1	1	1	-1	-1
GO:BP	response to nicotine	GO:0035094	50	21031	1	1	96	2	1	1	-1	-1	1	1	97	1	1	1	-1	-1
GO:BP	tube formation	GO:0035148	150	21031	1	1	96	2	1	1	90	2	1	1	97	1	1	1	-1	-1
GO:BP	regulation of tube size	GO:0035150	150	21031	1	1	96	3	1	1	90	3	1	1	97	2	1	1	-1	-1
GO:BP	tube morphogenesis	GO:0035239	872	21031	1	1	96	5	1	1	90	6	1	1	97	4	1	1	93	8
GO:BP	regulation of transmembrane transport	GO:0034762	446	21031	1	1	96	3	1	1	90	8	1	1	97	4	1	1	93	2
GO:BP	multicellular organism growth	GO:0035264	155	21031	1	1	96	1	1	1	90	1	1	1	97	1	1	1	93	3
GO:BP	endocrine system development	GO:0035270	142	21031	1	1	96	1	1	1	90	1	1	1	97	3	1	1	93	1
GO:BP	exocrine system development	GO:0035272	48	21031	1	1	-1	-1	1	1	-1	-1	1	1	97	1	1	1	-1	-1
GO:BP	segmentation	GO:0035282	106	21031	1	1	-1	-1	1	1	90	2	1	1	97	1	1	1	-1	-1
GO:BP	tube development	GO:0035295	1091	21031	1	1	96	7	1	1	90	6	1	1	97	6	1	1	93	8
GO:BP	regulation of tube diameter	GO:0035296	149	21031	1	1	96	3	1	1	90	3	1	1	97	2	1	1	-1	-1
GO:BP	DNA dealkylation	GO:0035510	39	21031	1	1	96	2	1	1	-1	-1	1	1	97	1	1	1	-1	-1
GO:BP	intracellular signal transduction	GO:0035556	2668	21031	1	1	96	23	1	1	90	16	1	1	97	16	1	1	93	16
GO:BP	calcium-mediated signaling using intracellular calcium source	GO:0035584	22	21031	1	1	-1	-1	1	1	-1	-1	1	1	97	1	1	1	-1	-1
GO:BP	purinergic nucleotide receptor signaling pathway	GO:0035590	32	21031	1	1	-1	-1	1	1	90	1	1	1	97	1	1	1	-1	-1
GO:BP	establishment of protein localization to extracellular region	GO:0035592	367	21031	1	1	96	1	1	1	90	3	1	1	97	3	1	1	93	2
GO:BP	renal glucose absorption	GO:0035623	4	21031	1	1	-1	-1	1	1	90	1	1	1	97	1	1	1	-1	-1
GO:BP	organ growth	GO:0035265	165	21031	1	1	96	1	1	1	90	1	1	1	97	1	1	1	93	1
GO:BP	response to gonadotropin	GO:0034698	28	21031	1	1	-1	-1	1	1	-1	-1	1	1	97	1	1	1	-1	-1
GO:BP	response to prostaglandin E	GO:0034695	26	21031	1	1	-1	-1	1	1	-1	-1	1	1	97	1	1	1	93	1
GO:BP	response to prostaglandin	GO:0034694	34	21031	1	1	-1	-1	1	1	-1	-1	1	1	97	1	1	1	93	1
GO:BP	maintenance of mitotic sister chromatid cohesion	GO:0034088	13	21031	1	1	-1	-1	1	1	-1	-1	1	1	97	1	1	1	-1	-1
GO:BP	response to cytokine	GO:0034097	932	21031	1	1	96	8	1	1	90	9	1	1	97	2	1	1	93	6
GO:BP	erythrocyte homeostasis	GO:0034101	142	21031	1	1	96	1	1	1	-1	-1	1	1	97	1	1	1	-1	-1
GO:BP	homotypic cell-cell adhesion	GO:0034109	97	21031	1	1	96	1	1	1	-1	-1	1	1	97	1	1	1	-1	-1
GO:BP	amyloid-beta formation	GO:0034205	44	21031	1	1	-1	-1	1	1	90	1	1	1	97	2	1	1	-1	-1
GO:BP	carbohydrate transmembrane transport	GO:0034219	132	21031	1	1	-1	-1	1	1	90	2	1	1	97	3	1	1	93	1
GO:BP	regulation of amide metabolic process	GO:0034248	439	21031	1	1	96	6	1	1	90	1	1	1	97	4	1	1	-1	-1
GO:BP	negative regulation of amide metabolic process	GO:0034249	151	21031	1	1	96	1	1	1	90	1	1	1	97	3	1	1	-1	-1
GO:BP	response to monosaccharide	GO:0034284	215	21031	1	1	96	4	1	1	90	2	1	1	97	2	1	1	93	2
GO:BP	primary alcohol metabolic process	GO:0034308	106	21031	1	1	96	2	1	1	-1	-1	1	1	97	1	1	1	93	2
GO:BP	cell junction assembly	GO:0034329	449	21031	1	1	96	3	1	1	90	4	1	1	97	3	1	1	93	3
GO:BP	cell junction organization	GO:0034330	759	21031	1	1	96	3	1	1	90	4	1	1	97	8	1	1	93	4
GO:BP	adherens junction organization	GO:0034332	57	21031	1	1	-1	-1	1	1	90	2	1	1	97	1	1	1	-1	-1
GO:BP	glial cell apoptotic process	GO:0034349	16	21031	1	1	96	1	1	1	-1	-1	1	1	97	1	1	1	-1	-1
GO:BP	substrate adhesion-dependent cell spreading	GO:0034446	101	21031	1	1	96	1	1	1	-1	-1	1	1	97	1	1	1	93	1
GO:BP	protein localization to chromosome	GO:0034502	121	21031	1	1	-1	-1	1	1	90	1	1	1	97	1	1	1	93	1
GO:BP	centromere complex assembly	GO:0034508	28	21031	1	1	-1	-1	1	1	-1	-1	1	1	97	1	1	1	-1	-1
GO:BP	cellular response to oxidative stress	GO:0034599	242	21031	1	1	96	4	1	1	-1	-1	1	1	97	2	1	1	93	1
GO:BP	cellular response to reactive oxygen species	GO:0034614	146	21031	1	1	96	4	1	1	-1	-1	1	1	97	1	1	1	-1	-1
GO:BP	cellular nitrogen compound metabolic process	GO:0034641	8692	21031	1	1	96	48	1	1	90	20	1	1	97	33	1	1	93	36
GO:BP	retinoic acid catabolic process	GO:0034653	4	21031	1	1	-1	-1	1	1	-1	-1	1	1	97	1	1	1	-1	-1
GO:BP	nucleobase-containing compound biosynthetic process	GO:0034654	4027	21031	1	1	96	30	1	1	90	12	1	1	97	25	1	1	93	23
GO:BP	nucleobase-containing compound catabolic process	GO:0034655	526	21031	1	1	96	8	1	1	90	3	1	1	97	4	1	1	93	2
GO:BP	nucleobase-containing small molecule catabolic process	GO:0034656	29	21031	1	1	-1	-1	1	1	90	1	1	1	97	1	1	1	-1	-1
GO:BP	ncRNA metabolic process	GO:0034660	640	21031	1	1	96	7	1	1	90	2	1	1	97	1	1	1	-1	-1
GO:BP	oligopeptide transmembrane transport	GO:0035672	15	21031	1	1	-1	-1	1	1	-1	-1	1	1	97	1	1	1	-1	-1
GO:BP	CD4-positive, alpha-beta T cell activation	GO:0035710	119	21031	1	1	96	1	1	1	-1	-1	1	1	97	2	1	1	-1	-1
GO:BP	sodium ion transmembrane transport	GO:0035725	166	21031	1	1	96	1	1	1	90	3	1	1	97	5	1	1	93	1
GO:BP	regulation of lysosomal lumen pH	GO:0035751	32	21031	1	1	-1	-1	1	1	-1	-1	1	1	97	1	1	1	-1	-1
GO:BP	C-X-C chemokine receptor CXCR4 signaling pathway	GO:0038159	6	21031	1	1	-1	-1	1	1	-1	-1	1	1	97	1	1	1	-1	-1
GO:BP	CXCL12-activated CXCR4 signaling pathway	GO:0038160	5	21031	1	1	-1	-1	1	1	-1	-1	1	1	97	1	1	1	-1	-1
GO:BP	neurotrophin signaling pathway	GO:0038179	40	21031	1	1	-1	-1	1	1	90	1	1	1	97	1	1	1	-1	-1
GO:BP	thyroid-stimulating hormone signaling pathway	GO:0038194	2	21031	1	1	-1	-1	1	1	90	1	1	1	97	1	1	1	-1	-1
GO:BP	RIG-I signaling pathway	GO:0039529	28	21031	1	1	-1	-1	1	1	-1	-1	1	1	97	1	1	1	-1	-1
GO:BP	regulation of cytoplasmic pattern recognition receptor signaling pathway	GO:0039531	105	21031	1	1	-1	-1	1	1	90	1	1	1	97	1	1	1	-1	-1
GO:BP	regulation of RIG-I signaling pathway	GO:0039535	21	21031	1	1	-1	-1	1	1	-1	-1	1	1	97	1	1	1	-1	-1
GO:BP	growth	GO:0040007	939	21031	1	1	96	7	1	1	90	5	1	1	97	6	1	1	93	8
GO:BP	regulation of growth	GO:0040008	620	21031	1	1	96	5	1	1	90	3	1	1	97	4	1	1	93	3
GO:BP	locomotion	GO:0040011	1234	21031	1	1	96	11	1	1	90	9	1	1	97	7	1	1	93	3
GO:BP	regulation of locomotion	GO:0040012	1038	21031	1	1	96	9	1	1	90	5	1	1	97	7	1	1	93	2
GO:BP	negative regulation of locomotion	GO:0040013	336	21031	1	1	96	4	1	1	90	1	1	1	97	2	1	1	93	1
GO:BP	regulation of multicellular organism growth	GO:0040014	67	21031	1	1	96	1	1	1	90	1	1	1	97	1	1	1	93	1
GO:BP	positive regulation of locomotion	GO:0040017	583	21031	1	1	96	5	1	1	90	1	1	1	97	5	1	1	93	1
GO:BP	positive regulation of multicellular organism growth	GO:0040018	33	21031	1	1	-1	-1	1	1	90	1	1	1	97	1	1	1	-1	-1
GO:BP	epigenetic regulation of gene expression	GO:0040029	225	21031	1	1	96	5	1	1	-1	-1	1	1	97	1	1	1	93	2
GO:BP	fluid transport	GO:0042044	39	21031	1	1	-1	-1	1	1	-1	-1	1	1	97	1	1	1	-1	-1
GO:BP	wound healing	GO:0042060	425	21031	1	1	96	2	1	1	90	2	1	1	97	2	1	1	93	3
GO:BP	gliogenesis	GO:0042063	345	21031	1	1	96	6	1	1	90	4	1	1	97	6	1	1	93	4
GO:BP	T-helper cell differentiation	GO:0042093	73	21031	1	1	96	1	1	1	-1	-1	1	1	97	1	1	1	-1	-1
GO:BP	T cell proliferation	GO:0042098	214	21031	1	1	96	4	1	1	-1	-1	1	1	97	1	1	1	-1	-1
GO:BP	T cell activation	GO:0042110	555	21031	1	1	96	8	1	1	90	1	1	1	97	5	1	1	93	2
GO:BP	B cell activation	GO:0042113	281	21031	1	1	96	4	1	1	90	1	1	1	97	3	1	1	93	2
GO:BP	regulation of T cell proliferation	GO:0042129	181	21031	1	1	96	1	1	1	-1	-1	1	1	97	1	1	1	-1	-1
GO:BP	chemokine (C-X-C motif) ligand 12 signaling pathway	GO:0038146	7	21031	1	1	-1	-1	1	1	-1	-1	1	1	97	1	1	1	-1	-1
GO:BP	regulation of protein catabolic process	GO:0042176	365	21031	1	1	96	5	1	1	90	5	1	1	97	1	1	1	93	3
GO:BP	ERBB signaling pathway	GO:0038127	124	21031	1	1	96	4	1	1	90	1	1	1	97	1	1	1	93	2
GO:BP	Fc-gamma receptor signaling pathway	GO:0038094	32	21031	1	1	96	2	1	1	-1	-1	1	1	97	1	1	1	-1	-1
GO:BP	lysosomal lumen pH elevation	GO:0035752	4	21031	1	1	-1	-1	1	1	-1	-1	1	1	97	1	1	1	-1	-1
GO:BP	insulin secretion involved in cellular response to glucose stimulus	GO:0035773	69	21031	1	1	-1	-1	1	1	-1	-1	1	1	97	1	1	1	-1	-1
GO:BP	platelet-derived growth factor receptor-alpha signaling pathway	GO:0035790	7	21031	1	1	-1	-1	1	1	-1	-1	1	1	97	1	1	1	-1	-1
GO:BP	exit from host cell	GO:0035891	31	21031	1	1	-1	-1	1	1	-1	-1	1	1	97	1	1	1	-1	-1
GO:BP	skeletal muscle cell differentiation	GO:0035914	75	21031	1	1	96	1	1	1	-1	-1	1	1	97	1	1	1	-1	-1
GO:BP	cellular response to vascular endothelial growth factor stimulus	GO:0035924	64	21031	1	1	-1	-1	1	1	-1	-1	1	1	97	1	1	1	93	2
GO:BP	endodermal cell differentiation	GO:0035987	50	21031	1	1	96	1	1	1	90	1	1	1	97	1	1	1	93	1
GO:BP	CD8-positive, alpha-beta T cell activation	GO:0036037	29	21031	1	1	-1	-1	1	1	-1	-1	1	1	97	1	1	1	-1	-1
GO:BP	response to platelet-derived growth factor	GO:0036119	23	21031	1	1	-1	-1	1	1	-1	-1	1	1	97	1	1	1	-1	-1
GO:BP	cellular response to platelet-derived growth factor stimulus	GO:0036120	21	21031	1	1	-1	-1	1	1	-1	-1	1	1	97	1	1	1	-1	-1
GO:BP	protein modification process	GO:0036211	3031	21031	1	1	96	24	1	1	90	14	1	1	97	19	1	1	93	15
GO:BP	swimming behavior	GO:0036269	2	21031	1	1	-1	-1	1	1	-1	-1	1	1	97	1	1	1	-1	-1
GO:BP	response to decreased oxygen levels	GO:0036293	316	21031	1	1	96	2	1	1	90	3	1	1	97	2	1	1	93	1
GO:BP	response to increased oxygen levels	GO:0036296	29	21031	1	1	96	1	1	1	90	1	1	1	97	1	1	1	-1	-1
GO:BP	sodium ion export across plasma membrane	GO:0036376	16	21031	1	1	-1	-1	1	1	-1	-1	1	1	97	1	1	1	-1	-1
GO:BP	maintenance of lens transparency	GO:0036438	7	21031	1	1	-1	-1	1	1	-1	-1	1	1	97	1	1	1	-1	-1
GO:BP	myofibroblast differentiation	GO:0036446	9	21031	1	1	-1	-1	1	1	-1	-1	1	1	97	1	1	1	-1	-1
GO:BP	netrin-activated signaling pathway	GO:0038007	10	21031	1	1	-1	-1	1	1	-1	-1	1	1	97	1	1	1	-1	-1
GO:BP	signal transduction in absence of ligand	GO:0038034	71	21031	1	1	-1	-1	1	1	90	1	1	1	97	1	1	1	93	2
GO:BP	non-canonical NF-kappaB signal transduction	GO:0038061	123	21031	1	1	-1	-1	1	1	-1	-1	1	1	97	2	1	1	-1	-1
GO:BP	peptidyl-tyrosine autophosphorylation	GO:0038083	17	21031	1	1	96	1	1	1	90	1	1	1	97	1	1	1	-1	-1
GO:BP	vascular endothelial growth factor signaling pathway	GO:0038084	45	21031	1	1	-1	-1	1	1	-1	-1	1	1	97	1	1	1	93	1
GO:BP	VEGF-activated platelet-derived growth factor receptor signaling pathway	GO:0038086	3	21031	1	1	-1	-1	1	1	-1	-1	1	1	97	1	1	1	-1	-1
GO:BP	positive regulation of cell proliferation by VEGF-activated platelet derived growth factor receptor signaling pathway	GO:0038091	3	21031	1	1	-1	-1	1	1	-1	-1	1	1	97	1	1	1	-1	-1
GO:BP	Fc receptor signaling pathway	GO:0038093	56	21031	1	1	96	2	1	1	-1	-1	1	1	97	1	1	1	-1	-1
GO:BP	Fc-gamma receptor signaling pathway involved in phagocytosis	GO:0038096	23	21031	1	1	96	2	1	1	-1	-1	1	1	97	1	1	1	-1	-1
GO:BP	cell cycle process	GO:0022402	1276	21031	1	1	96	12	1	1	90	6	1	1	97	6	1	1	93	5
GO:BP	regulation of rhodopsin mediated signaling pathway	GO:0022400	10	21031	1	1	-1	-1	1	1	90	1	1	1	97	1	1	1	-1	-1
GO:BP	metencephalon development	GO:0022037	116	21031	1	1	96	3	1	1	90	3	1	1	97	1	1	1	93	1
GO:BP	mRNA transcription	GO:0009299	53	21031	1	1	96	2	1	1	-1	-1	1	1	97	1	1	1	-1	-1
GO:BP	protein secretion	GO:0009306	366	21031	1	1	96	1	1	1	90	3	1	1	97	3	1	1	93	2
GO:BP	amine metabolic process	GO:0009308	119	21031	1	1	96	1	1	1	90	1	1	1	97	2	1	1	-1	-1
GO:BP	amine biosynthetic process	GO:0009309	38	21031	1	1	96	1	1	1	-1	-1	1	1	97	1	1	1	-1	-1
GO:BP	amine catabolic process	GO:0009310	20	21031	1	1	-1	-1	1	1	-1	-1	1	1	97	1	1	1	-1	-1
GO:BP	response to radiation	GO:0009314	428	21031	1	1	96	4	1	1	90	6	1	1	97	3	1	1	93	5
GO:BP	2'-deoxyribonucleotide metabolic process	GO:0009394	41	21031	1	1	-1	-1	1	1	90	1	1	1	97	1	1	1	93	1
GO:BP	toxin metabolic process	GO:0009404	14	21031	1	1	-1	-1	1	1	-1	-1	1	1	97	1	1	1	93	1
GO:BP	response to xenobiotic stimulus	GO:0009410	432	21031	1	1	96	6	1	1	90	3	1	1	97	3	1	1	93	1
GO:BP	response to water deprivation	GO:0009414	5	21031	1	1	-1	-1	1	1	-1	-1	1	1	97	1	1	1	-1	-1
GO:BP	response to water	GO:0009415	13	21031	1	1	-1	-1	1	1	90	1	1	1	97	1	1	1	-1	-1
GO:BP	response to temperature stimulus	GO:0009266	169	21031	1	1	96	2	1	1	90	2	1	1	97	1	1	1	93	2
GO:BP	response to light stimulus	GO:0009416	317	21031	1	1	96	3	1	1	90	6	1	1	97	3	1	1	93	3
GO:BP	gamma-aminobutyric acid biosynthetic process	GO:0009449	6	21031	1	1	-1	-1	1	1	-1	-1	1	1	97	1	1	1	-1	-1
GO:BP	RNA modification	GO:0009451	182	21031	1	1	-1	-1	1	1	-1	-1	1	1	97	2	1	1	-1	-1
GO:BP	fertilization	GO:0009566	209	21031	1	1	-1	-1	1	1	90	2	1	1	97	1	1	1	-1	-1
GO:BP	detection of chemical stimulus	GO:0009593	480	21031	1	1	-1	-1	1	1	90	1	1	1	97	1	1	1	-1	-1
GO:BP	detection of biotic stimulus	GO:0009595	38	21031	1	1	-1	-1	1	1	-1	-1	1	1	97	1	1	1	-1	-1
GO:BP	response to external stimulus	GO:0009605	2723	21031	1	1	96	16	1	1	90	17	1	1	97	17	1	1	93	13
GO:BP	response to biotic stimulus	GO:0009607	1586	21031	1	1	96	8	1	1	90	6	1	1	97	7	1	1	93	7
GO:BP	gamma-aminobutyric acid metabolic process	GO:0009448	8	21031	1	1	-1	-1	1	1	-1	-1	1	1	97	1	1	1	-1	-1
GO:BP	deoxyribonucleotide catabolic process	GO:0009264	28	21031	1	1	-1	-1	1	1	90	1	1	1	97	1	1	1	-1	-1
GO:BP	deoxyribonucleotide metabolic process	GO:0009262	42	21031	1	1	-1	-1	1	1	90	1	1	1	97	1	1	1	93	1
GO:BP	ribonucleotide catabolic process	GO:0009261	144	21031	1	1	96	3	1	1	90	3	1	1	97	3	1	1	93	2
GO:BP	purine nucleoside triphosphate metabolic process	GO:0009144	254	21031	1	1	96	4	1	1	90	3	1	1	97	2	1	1	93	1
GO:BP	purine ribonucleotide metabolic process	GO:0009150	450	21031	1	1	96	5	1	1	90	5	1	1	97	2	1	1	93	3
GO:BP	purine ribonucleotide catabolic process	GO:0009154	137	21031	1	1	96	3	1	1	90	2	1	1	97	2	1	1	93	2
GO:BP	ribonucleoside monophosphate catabolic process	GO:0009158	15	21031	1	1	-1	-1	1	1	90	1	1	1	97	1	1	1	-1	-1
GO:BP	deoxyribonucleoside monophosphate catabolic process	GO:0009159	14	21031	1	1	-1	-1	1	1	90	1	1	1	97	1	1	1	-1	-1
GO:BP	ribonucleoside monophosphate metabolic process	GO:0009161	62	21031	1	1	-1	-1	1	1	90	1	1	1	97	1	1	1	93	1
GO:BP	deoxyribonucleoside monophosphate metabolic process	GO:0009162	24	21031	1	1	-1	-1	1	1	90	1	1	1	97	1	1	1	93	1
GO:BP	nucleoside catabolic process	GO:0009164	25	21031	1	1	-1	-1	1	1	90	1	1	1	97	1	1	1	-1	-1
GO:BP	nucleotide catabolic process	GO:0009166	170	21031	1	1	96	3	1	1	90	3	1	1	97	3	1	1	93	2
GO:BP	pyrimidine ribonucleoside monophosphate metabolic process	GO:0009173	17	21031	1	1	-1	-1	1	1	90	1	1	1	97	1	1	1	93	1
GO:BP	pyrimidine ribonucleoside monophosphate catabolic process	GO:0009175	6	21031	1	1	-1	-1	1	1	90	1	1	1	97	1	1	1	-1	-1
GO:BP	pyrimidine deoxyribonucleoside monophosphate metabolic process	GO:0009176	11	21031	1	1	-1	-1	1	1	90	1	1	1	97	1	1	1	-1	-1
GO:BP	pyrimidine deoxyribonucleoside monophosphate catabolic process	GO:0009178	8	21031	1	1	-1	-1	1	1	90	1	1	1	97	1	1	1	-1	-1
GO:BP	purine ribonucleoside diphosphate metabolic process	GO:0009179	112	21031	1	1	96	3	1	1	90	2	1	1	97	2	1	1	93	1
GO:BP	purine ribonucleoside diphosphate catabolic process	GO:0009181	96	21031	1	1	96	3	1	1	90	2	1	1	97	2	1	1	93	1
GO:BP	ribonucleoside diphosphate metabolic process	GO:0009185	122	21031	1	1	96	3	1	1	90	2	1	1	97	2	1	1	93	1
GO:BP	ribonucleoside diphosphate catabolic process	GO:0009191	99	21031	1	1	96	3	1	1	90	2	1	1	97	2	1	1	93	1
GO:BP	ribonucleoside triphosphate metabolic process	GO:0009199	254	21031	1	1	96	5	1	1	90	3	1	1	97	2	1	1	93	1
GO:BP	purine ribonucleoside triphosphate metabolic process	GO:0009205	247	21031	1	1	96	4	1	1	90	3	1	1	97	2	1	1	93	1
GO:BP	pyrimidine ribonucleotide metabolic process	GO:0009218	33	21031	1	1	96	1	1	1	90	1	1	1	97	1	1	1	93	1
GO:BP	pyrimidine deoxyribonucleotide metabolic process	GO:0009219	23	21031	1	1	-1	-1	1	1	90	1	1	1	97	1	1	1	-1	-1
GO:BP	pyrimidine ribonucleotide catabolic process	GO:0009222	9	21031	1	1	-1	-1	1	1	90	1	1	1	97	1	1	1	-1	-1
GO:BP	pyrimidine deoxyribonucleotide catabolic process	GO:0009223	18	21031	1	1	-1	-1	1	1	90	1	1	1	97	1	1	1	-1	-1
GO:BP	cobalamin metabolic process	GO:0009235	9	21031	1	1	-1	-1	1	1	90	1	1	1	97	1	1	1	-1	-1
GO:BP	ribonucleotide metabolic process	GO:0009259	471	21031	1	1	96	6	1	1	90	6	1	1	97	3	1	1	93	4
GO:BP	response to wounding	GO:0009611	557	21031	1	1	96	4	1	1	90	4	1	1	97	4	1	1	93	3
GO:BP	response to mechanical stimulus	GO:0009612	217	21031	1	1	96	1	1	1	90	5	1	1	97	4	1	1	93	2
GO:BP	response to virus	GO:0009615	406	21031	1	1	96	2	1	1	-1	-1	1	1	97	2	1	1	-1	-1
GO:BP	response to bacterium	GO:0009617	720	21031	1	1	96	3	1	1	90	2	1	1	97	2	1	1	93	3
GO:BP	hormone transport	GO:0009914	328	21031	1	1	96	1	1	1	90	4	1	1	97	4	1	1	93	2
GO:BP	anterior/posterior pattern specification	GO:0009952	225	21031	1	1	-1	-1	1	1	90	4	1	1	97	2	1	1	-1	-1
GO:BP	dorsal/ventral pattern formation	GO:0009953	90	21031	1	1	-1	-1	1	1	-1	-1	1	1	97	1	1	1	-1	-1
GO:BP	cellular process	GO:0009987	19708	21031	1	1	96	93	1	1	90	86	1	1	97	91	1	1	93	88
GO:BP	response to extracellular stimulus	GO:0009991	525	21031	1	1	96	5	1	1	90	1	1	1	97	3	1	1	93	1
GO:BP	glial cell differentiation	GO:0010001	259	21031	1	1	96	6	1	1	90	4	1	1	97	3	1	1	93	2
GO:BP	response to inorganic substance	GO:0010035	531	21031	1	1	96	6	1	1	90	5	1	1	97	4	1	1	93	3
GO:BP	response to metal ion	GO:0010038	360	21031	1	1	96	2	1	1	90	3	1	1	97	2	1	1	93	3
GO:BP	body morphogenesis	GO:0010171	50	21031	1	1	-1	-1	1	1	-1	-1	1	1	97	1	1	1	93	1
GO:BP	vascular transport	GO:0010232	87	21031	1	1	-1	-1	1	1	-1	-1	1	1	97	2	1	1	-1	-1
GO:BP	response to organonitrogen compound	GO:0010243	964	21031	1	1	96	11	1	1	90	10	1	1	97	12	1	1	93	4
GO:BP	establishment or maintenance of transmembrane electrochemical gradient	GO:0010248	11	21031	1	1	-1	-1	1	1	-1	-1	1	1	97	1	1	1	-1	-1
GO:BP	endomembrane system organization	GO:0010256	602	21031	1	1	96	2	1	1	90	1	1	1	97	1	1	1	93	2
GO:BP	membrane invagination	GO:0010324	66	21031	1	1	-1	-1	1	1	-1	-1	1	1	97	1	1	1	-1	-1
GO:BP	regulation of anion channel activity	GO:0010359	8	21031	1	1	-1	-1	1	1	-1	-1	1	1	97	1	1	1	-1	-1
GO:BP	exit from mitosis	GO:0010458	32	21031	1	1	-1	-1	1	1	-1	-1	1	1	97	1	1	1	-1	-1
GO:BP	mesenchymal cell proliferation	GO:0010463	47	21031	1	1	-1	-1	1	1	-1	-1	1	1	97	1	1	1	-1	-1
GO:BP	regulation of mesenchymal cell proliferation	GO:0010464	34	21031	1	1	-1	-1	1	1	-1	-1	1	1	97	1	1	1	-1	-1
GO:BP	negative regulation of peptidase activity	GO:0010466	91	21031	1	1	96	2	1	1	-1	-1	1	1	97	1	1	1	-1	-1
GO:BP	gene expression	GO:0010467	9214	21031	1	1	96	42	1	1	90	18	1	1	97	33	1	1	93	33
GO:BP	regulation of gene expression	GO:0010468	5526	21031	1	1	96	37	1	1	90	16	1	1	97	30	1	1	93	23
GO:BP	proteasomal protein catabolic process	GO:0010498	496	21031	1	1	96	7	1	1	90	2	1	1	97	3	1	1	93	2
GO:BP	epidermal cell differentiation	GO:0009913	250	21031	1	1	96	2	1	1	90	1	1	1	97	1	1	1	-1	-1
GO:BP	nucleoside triphosphate metabolic process	GO:0009141	270	21031	1	1	96	5	1	1	90	3	1	1	97	2	1	1	93	1
GO:BP	positive regulation of catabolic process	GO:0009896	533	21031	1	1	96	5	1	1	90	3	1	1	97	1	1	1	93	3
GO:BP	regulation of catabolic process	GO:0009894	1026	21031	1	1	96	13	1	1	90	7	1	1	97	5	1	1	93	5
GO:BP	response to nematode	GO:0009624	7	21031	1	1	-1	-1	1	1	-1	-1	1	1	97	1	1	1	93	1
GO:BP	response to toxic substance	GO:0009636	238	21031	1	1	96	1	1	1	-1	-1	1	1	97	3	1	1	93	2
GO:BP	response to light intensity	GO:0009642	19	21031	1	1	-1	-1	1	1	-1	-1	1	1	97	1	1	1	-1	-1
GO:BP	catechol-containing compound metabolic process	GO:0009712	57	21031	1	1	96	1	1	1	90	1	1	1	97	1	1	1	-1	-1
GO:BP	catechol-containing compound biosynthetic process	GO:0009713	21	21031	1	1	96	1	1	1	-1	-1	1	1	97	1	1	1	-1	-1
GO:BP	response to carbohydrate	GO:0009743	239	21031	1	1	96	4	1	1	90	2	1	1	97	2	1	1	93	3
GO:BP	response to hexose	GO:0009746	208	21031	1	1	96	4	1	1	90	2	1	1	97	2	1	1	93	2
GO:BP	response to glucose	GO:0009749	204	21031	1	1	96	4	1	1	90	2	1	1	97	2	1	1	93	2
GO:BP	embryo development	GO:0009790	1128	21031	1	1	96	9	1	1	90	9	1	1	97	10	1	1	93	8
GO:BP	post-embryonic development	GO:0009791	89	21031	1	1	96	1	1	1	-1	-1	1	1	97	1	1	1	-1	-1
GO:BP	embryo development ending in birth or egg hatching	GO:0009792	691	21031	1	1	96	6	1	1	90	5	1	1	97	2	1	1	93	6
GO:BP	specification of symmetry	GO:0009799	148	21031	1	1	-1	-1	1	1	90	2	1	1	97	1	1	1	-1	-1
GO:BP	determination of bilateral symmetry	GO:0009855	148	21031	1	1	-1	-1	1	1	90	2	1	1	97	1	1	1	-1	-1
GO:BP	embryonic pattern specification	GO:0009880	73	21031	1	1	-1	-1	1	1	90	1	1	1	97	1	1	1	-1	-1
GO:BP	post-embryonic animal morphogenesis	GO:0009886	6	21031	1	1	-1	-1	1	1	-1	-1	1	1	97	1	1	1	-1	-1
GO:BP	tissue development	GO:0009888	2010	21031	1	1	96	16	1	1	90	12	1	1	97	16	1	1	93	12
GO:BP	regulation of biosynthetic process	GO:0009889	5813	21031	1	1	96	38	1	1	90	17	1	1	97	31	1	1	93	25
GO:BP	negative regulation of biosynthetic process	GO:0009890	2838	21031	1	1	96	23	1	1	90	10	1	1	97	14	1	1	93	7
GO:BP	positive regulation of biosynthetic process	GO:0009891	2706	21031	1	1	96	24	1	1	90	11	1	1	97	20	1	1	93	13
GO:BP	negative regulation of metabolic process	GO:0009892	3455	21031	1	1	96	29	1	1	90	13	1	1	97	21	1	1	93	8
GO:BP	negative regulation of catabolic process	GO:0009895	347	21031	1	1	96	4	1	1	90	3	1	1	97	3	1	1	93	2
GO:BP	regulation of phospholipase activity	GO:0010517	53	21031	1	1	96	1	1	1	-1	-1	1	1	97	1	1	1	-1	-1
GO:BP	purine nucleoside diphosphate catabolic process	GO:0009137	96	21031	1	1	96	3	1	1	90	2	1	1	97	2	1	1	93	1
GO:BP	nucleoside diphosphate catabolic process	GO:0009134	103	21031	1	1	96	4	1	1	90	2	1	1	97	2	1	1	93	1
GO:BP	neuromuscular junction development	GO:0007528	57	21031	1	1	-1	-1	1	1	-1	-1	1	1	97	2	1	1	-1	-1
GO:BP	sex differentiation	GO:0007548	290	21031	1	1	96	1	1	1	-1	-1	1	1	97	2	1	1	93	4
GO:BP	female pregnancy	GO:0007565	182	21031	1	1	-1	-1	1	1	90	2	1	1	97	1	1	1	93	2
GO:BP	embryo implantation	GO:0007566	57	21031	1	1	-1	-1	1	1	90	1	1	1	97	1	1	1	93	2
GO:BP	digestion	GO:0007586	135	21031	1	1	96	2	1	1	-1	-1	1	1	97	1	1	1	-1	-1
GO:BP	blood coagulation	GO:0007596	228	21031	1	1	96	1	1	1	90	2	1	1	97	2	1	1	93	3
GO:BP	hemostasis	GO:0007599	235	21031	1	1	96	1	1	1	90	2	1	1	97	2	1	1	93	3
GO:BP	phototransduction	GO:0007602	50	21031	1	1	-1	-1	1	1	90	1	1	1	97	1	1	1	-1	-1
GO:BP	phototransduction, visible light	GO:0007603	20	21031	1	1	-1	-1	1	1	90	1	1	1	97	1	1	1	-1	-1
GO:BP	skeletal muscle tissue development	GO:0007519	171	21031	1	1	96	1	1	1	90	1	1	1	97	2	1	1	-1	-1
GO:BP	sensory perception of sound	GO:0007605	165	21031	1	1	96	1	1	1	90	3	1	1	97	1	1	1	93	1
GO:BP	behavior	GO:0007610	662	21031	1	1	96	5	1	1	90	10	1	1	97	10	1	1	93	5
GO:BP	learning or memory	GO:0007611	279	21031	1	1	96	2	1	1	90	4	1	1	97	5	1	1	93	1
GO:BP	learning	GO:0007612	156	21031	1	1	96	2	1	1	90	3	1	1	97	3	1	1	93	1
GO:BP	memory	GO:0007613	125	21031	1	1	-1	-1	1	1	90	1	1	1	97	2	1	1	-1	-1
GO:BP	long-term memory	GO:0007616	38	21031	1	1	-1	-1	1	1	-1	-1	1	1	97	1	1	1	-1	-1
GO:BP	circadian rhythm	GO:0007623	205	21031	1	1	96	4	1	1	90	1	1	1	97	4	1	1	93	1
GO:BP	locomotory behavior	GO:0007626	214	21031	1	1	96	1	1	1	90	4	1	1	97	5	1	1	93	3
GO:BP	feeding behavior	GO:0007631	105	21031	1	1	96	1	1	1	90	1	1	1	97	1	1	1	93	2
GO:BP	visual behavior	GO:0007632	55	21031	1	1	-1	-1	1	1	90	2	1	1	97	3	1	1	-1	-1
GO:BP	chemosensory behavior	GO:0007635	19	21031	1	1	-1	-1	1	1	90	1	1	1	97	1	1	1	-1	-1
GO:BP	blood circulation	GO:0008015	507	21031	1	1	96	3	1	1	90	8	1	1	97	6	1	1	93	1
GO:BP	sensory perception of chemical stimulus	GO:0007606	497	21031	1	1	-1	-1	1	1	90	2	1	1	97	1	1	1	-1	-1
GO:BP	muscle organ development	GO:0007517	357	21031	1	1	96	1	1	1	90	3	1	1	97	2	1	1	93	3
GO:BP	heart development	GO:0007507	599	21031	1	1	96	5	1	1	90	5	1	1	97	4	1	1	93	6
GO:BP	mesodermal cell fate determination	GO:0007500	3	21031	1	1	-1	-1	1	1	-1	-1	1	1	97	1	1	1	-1	-1
GO:BP	neurotransmitter secretion	GO:0007269	145	21031	1	1	96	1	1	1	90	3	1	1	97	4	1	1	93	1
GO:BP	neuron-neuron synaptic transmission	GO:0007270	8	21031	1	1	-1	-1	1	1	-1	-1	1	1	97	1	1	1	-1	-1
GO:BP	synaptic transmission, cholinergic	GO:0007271	33	21031	1	1	-1	-1	1	1	90	1	1	1	97	2	1	1	-1	-1
GO:BP	ensheathment of neurons	GO:0007272	156	21031	1	1	-1	-1	1	1	90	4	1	1	97	2	1	1	93	1
GO:BP	gamete generation	GO:0007276	819	21031	1	1	96	6	1	1	90	7	1	1	97	3	1	1	93	6
GO:BP	germ cell development	GO:0007281	367	21031	1	1	96	3	1	1	90	1	1	1	97	1	1	1	93	2
GO:BP	spermatogenesis	GO:0007283	633	21031	1	1	96	5	1	1	90	5	1	1	97	3	1	1	93	5
GO:BP	spermatid development	GO:0007286	210	21031	1	1	96	3	1	1	-1	-1	1	1	97	1	1	1	93	2
GO:BP	single fertilization	GO:0007338	166	21031	1	1	-1	-1	1	1	90	2	1	1	97	1	1	1	-1	-1
GO:BP	regulation of mitotic cell cycle	GO:0007346	496	21031	1	1	96	3	1	1	90	3	1	1	97	4	1	1	93	3
GO:BP	gastrulation	GO:0007369	194	21031	1	1	96	2	1	1	90	2	1	1	97	4	1	1	93	1
GO:BP	pattern specification process	GO:0007389	479	21031	1	1	-1	-1	1	1	90	5	1	1	97	4	1	1	-1	-1
GO:BP	neuroblast proliferation	GO:0007405	82	21031	1	1	96	1	1	1	90	1	1	1	97	2	1	1	-1	-1
GO:BP	axonogenesis	GO:0007409	466	21031	1	1	96	4	1	1	90	1	1	1	97	6	1	1	93	2
GO:BP	axon guidance	GO:0007411	249	21031	1	1	96	2	1	1	-1	-1	1	1	97	5	1	1	93	2
GO:BP	synapse assembly	GO:0007416	201	21031	1	1	96	1	1	1	90	2	1	1	97	2	1	1	-1	-1
GO:BP	central nervous system development	GO:0007417	1035	21031	1	1	96	12	1	1	90	10	1	1	97	10	1	1	93	8
GO:BP	brain development	GO:0007420	736	21031	1	1	96	7	1	1	90	7	1	1	97	10	1	1	93	6
GO:BP	peripheral nervous system development	GO:0007422	91	21031	1	1	-1	-1	1	1	90	1	1	1	97	2	1	1	-1	-1
GO:BP	salivary gland development	GO:0007431	36	21031	1	1	-1	-1	1	1	-1	-1	1	1	97	1	1	1	-1	-1
GO:BP	salivary gland morphogenesis	GO:0007435	33	21031	1	1	-1	-1	1	1	-1	-1	1	1	97	1	1	1	-1	-1
GO:BP	endoderm development	GO:0007492	87	21031	1	1	96	2	1	1	90	1	1	1	97	1	1	1	93	2
GO:BP	mesoderm development	GO:0007498	138	21031	1	1	-1	-1	1	1	90	3	1	1	97	2	1	1	-1	-1
GO:BP	regulation of heart contraction	GO:0008016	201	21031	1	1	-1	-1	1	1	90	3	1	1	97	3	1	1	93	1
GO:BP	cell recognition	GO:0008037	156	21031	1	1	96	1	1	1	90	1	1	1	97	1	1	1	93	1
GO:BP	neuron recognition	GO:0008038	45	21031	1	1	-1	-1	1	1	-1	-1	1	1	97	1	1	1	-1	-1
GO:BP	regulation of actin polymerization or depolymerization	GO:0008064	154	21031	1	1	96	3	1	1	-1	-1	1	1	97	1	1	1	-1	-1
GO:BP	carbohydrate transport	GO:0008643	156	21031	1	1	-1	-1	1	1	90	2	1	1	97	3	1	1	93	1
GO:BP	hexose transmembrane transport	GO:0008645	118	21031	1	1	-1	-1	1	1	90	2	1	1	97	2	1	1	93	1
GO:BP	amino acid biosynthetic process	GO:0008652	70	21031	1	1	96	2	1	1	90	1	1	1	97	3	1	1	93	1
GO:BP	macromolecule catabolic process	GO:0009057	1338	21031	1	1	96	14	1	1	90	5	1	1	97	5	1	1	93	8
GO:BP	biosynthetic process	GO:0009058	10704	21031	1	1	96	55	1	1	90	28	1	1	97	40	1	1	93	42
GO:BP	macromolecule biosynthetic process	GO:0009059	9691	21031	1	1	96	46	1	1	90	23	1	1	97	34	1	1	93	34
GO:BP	amino acid catabolic process	GO:0009063	112	21031	1	1	-1	-1	1	1	90	1	1	1	97	1	1	1	-1	-1
GO:BP	glutamine family amino acid metabolic process	GO:0009064	77	21031	1	1	96	1	1	1	90	1	1	1	97	1	1	1	93	1
GO:BP	aspartate family amino acid metabolic process	GO:0009066	45	21031	1	1	96	2	1	1	-1	-1	1	1	97	1	1	1	-1	-1
GO:BP	aspartate family amino acid biosynthetic process	GO:0009067	21	21031	1	1	96	2	1	1	-1	-1	1	1	97	1	1	1	-1	-1
GO:BP	aromatic amino acid metabolic process	GO:0009072	32	21031	1	1	-1	-1	1	1	-1	-1	1	1	97	1	1	1	-1	-1
GO:BP	methionine biosynthetic process	GO:0009086	12	21031	1	1	96	1	1	1	-1	-1	1	1	97	1	1	1	-1	-1
GO:BP	glycoprotein metabolic process	GO:0009100	372	21031	1	1	96	3	1	1	90	5	1	1	97	1	1	1	93	2
GO:BP	glycoprotein biosynthetic process	GO:0009101	311	21031	1	1	96	3	1	1	90	4	1	1	97	1	1	1	93	1
GO:BP	vitamin catabolic process	GO:0009111	14	21031	1	1	-1	-1	1	1	-1	-1	1	1	97	1	1	1	93	1
GO:BP	nucleobase metabolic process	GO:0009112	35	21031	1	1	96	1	1	1	-1	-1	1	1	97	1	1	1	-1	-1
GO:BP	nucleoside metabolic process	GO:0009116	57	21031	1	1	-1	-1	1	1	90	1	1	1	97	1	1	1	-1	-1
GO:BP	nucleotide metabolic process	GO:0009117	601	21031	1	1	96	8	1	1	90	6	1	1	97	3	1	1	93	6
GO:BP	deoxyribonucleoside metabolic process	GO:0009120	11	21031	1	1	-1	-1	1	1	-1	-1	1	1	97	1	1	1	-1	-1
GO:BP	nucleoside monophosphate metabolic process	GO:0009123	79	21031	1	1	-1	-1	1	1	90	1	1	1	97	1	1	1	93	1
GO:BP	nucleoside monophosphate catabolic process	GO:0009125	19	21031	1	1	-1	-1	1	1	90	1	1	1	97	1	1	1	-1	-1
GO:BP	pyrimidine nucleoside monophosphate metabolic process	GO:0009129	22	21031	1	1	-1	-1	1	1	90	1	1	1	97	1	1	1	93	1
GO:BP	pyrimidine nucleoside monophosphate catabolic process	GO:0009131	9	21031	1	1	-1	-1	1	1	90	1	1	1	97	1	1	1	-1	-1
GO:BP	nucleoside diphosphate metabolic process	GO:0009132	129	21031	1	1	96	4	1	1	90	2	1	1	97	2	1	1	93	1
GO:BP	intrinsic apoptotic signaling pathway in response to DNA damage	GO:0008630	106	21031	1	1	96	1	1	1	-1	-1	1	1	97	1	1	1	93	1
GO:BP	purine nucleoside diphosphate metabolic process	GO:0009135	112	21031	1	1	96	3	1	1	90	2	1	1	97	2	1	1	93	1
GO:BP	lipid biosynthetic process	GO:0008610	727	21031	1	1	96	11	1	1	90	6	1	1	97	1	1	1	93	6
GO:BP	regulation of smoothened signaling pathway	GO:0008589	89	21031	1	1	96	1	1	1	-1	-1	1	1	97	1	1	1	-1	-1
GO:BP	protein localization	GO:0008104	2731	21031	1	1	96	17	1	1	90	13	1	1	97	9	1	1	93	12
GO:BP	biological_process	GO:0008150	21031	21031	1	1	96	96	1	1	90	90	1	1	97	97	1	1	93	93
GO:BP	metabolic process	GO:0008152	14261	21031	1	1	96	72	1	1	90	41	1	1	97	56	1	1	93	60
GO:BP	actin polymerization or depolymerization	GO:0008154	197	21031	1	1	96	4	1	1	-1	-1	1	1	97	1	1	1	-1	-1
GO:BP	steroid metabolic process	GO:0008202	325	21031	1	1	96	4	1	1	90	2	1	1	97	1	1	1	93	3
GO:BP	estrogen metabolic process	GO:0008210	40	21031	1	1	-1	-1	1	1	-1	-1	1	1	97	1	1	1	93	1
GO:BP	protein alkylation	GO:0008213	49	21031	1	1	-1	-1	1	1	-1	-1	1	1	97	1	1	1	-1	-1
GO:BP	cell death	GO:0008219	1988	21031	1	1	96	16	1	1	90	10	1	1	97	14	1	1	93	9
GO:BP	positive regulation of cell population proliferation	GO:0008284	962	21031	1	1	96	8	1	1	90	10	1	1	97	12	1	1	93	6
GO:BP	negative regulation of cell population proliferation	GO:0008285	701	21031	1	1	96	7	1	1	90	5	1	1	97	5	1	1	93	5
GO:BP	insulin receptor signaling pathway	GO:0008286	120	21031	1	1	96	1	1	1	-1	-1	1	1	97	1	1	1	-1	-1
GO:BP	intracellular mRNA localization	GO:0008298	14	21031	1	1	-1	-1	1	1	-1	-1	1	1	97	1	1	1	-1	-1
GO:BP	isoprenoid catabolic process	GO:0008300	11	21031	1	1	-1	-1	1	1	-1	-1	1	1	97	1	1	1	-1	-1
GO:BP	associative learning	GO:0008306	87	21031	1	1	96	2	1	1	90	2	1	1	97	2	1	1	-1	-1
GO:BP	adult locomotory behavior	GO:0008344	87	21031	1	1	-1	-1	1	1	90	2	1	1	97	2	1	1	93	1
GO:BP	glial cell migration	GO:0008347	61	21031	1	1	-1	-1	1	1	-1	-1	1	1	97	2	1	1	93	2
GO:BP	regulation of cell shape	GO:0008360	140	21031	1	1	96	1	1	1	-1	-1	1	1	97	1	1	1	93	1
GO:BP	regulation of cell size	GO:0008361	195	21031	1	1	96	1	1	1	-1	-1	1	1	97	3	1	1	93	2
GO:BP	axon ensheathment	GO:0008366	156	21031	1	1	-1	-1	1	1	90	4	1	1	97	2	1	1	93	1
GO:BP	gonad development	GO:0008406	234	21031	1	1	96	1	1	1	-1	-1	1	1	97	2	1	1	93	1
GO:BP	visual learning	GO:0008542	48	21031	1	1	-1	-1	1	1	90	2	1	1	97	2	1	1	-1	-1
GO:BP	epidermis development	GO:0008544	393	21031	1	1	96	4	1	1	90	3	1	1	97	3	1	1	93	1
GO:BP	male gonad development	GO:0008584	150	21031	1	1	96	1	1	1	-1	-1	1	1	97	2	1	1	93	1
GO:BP	female gonad development	GO:0008585	102	21031	1	1	-1	-1	1	1	-1	-1	1	1	97	1	1	1	93	1
GO:BP	attachment of spindle microtubules to kinetochore	GO:0008608	53	21031	1	1	96	1	1	1	-1	-1	1	1	97	1	1	1	-1	-1
GO:BP	regulation of kinase activity	GO:0043549	483	21031	1	1	96	6	1	1	90	1	1	1	97	3	1	1	93	3
GO:BP	positive regulation of phospholipase activity	GO:0010518	45	21031	1	1	-1	-1	1	1	-1	-1	1	1	97	1	1	1	-1	-1
GO:BP	positive regulation of calcium ion transport into cytosol	GO:0010524	14	21031	1	1	-1	-1	1	1	-1	-1	1	1	97	1	1	1	-1	-1
GO:BP	hexose biosynthetic process	GO:0019319	90	21031	1	1	96	1	1	1	-1	-1	1	1	97	1	1	1	93	1
GO:BP	hexose catabolic process	GO:0019320	44	21031	1	1	-1	-1	1	1	-1	-1	1	1	97	1	1	1	-1	-1
GO:BP	phenol-containing compound catabolic process	GO:0019336	12	21031	1	1	-1	-1	1	1	-1	-1	1	1	97	1	1	1	-1	-1
GO:BP	pyridine nucleotide metabolic process	GO:0019362	166	21031	1	1	96	5	1	1	90	3	1	1	97	2	1	1	93	3
GO:BP	pyridine nucleotide catabolic process	GO:0019364	95	21031	1	1	96	3	1	1	90	2	1	1	97	2	1	1	93	1
GO:BP	aromatic compound biosynthetic process	GO:0019438	4116	21031	1	1	96	31	1	1	90	12	1	1	97	27	1	1	93	24
GO:BP	aromatic compound catabolic process	GO:0019439	587	21031	1	1	96	9	1	1	90	3	1	1	97	5	1	1	93	2
GO:BP	beta-alanine metabolic process	GO:0019482	3	21031	1	1	-1	-1	1	1	90	1	1	1	97	1	1	1	-1	-1
GO:BP	beta-alanine biosynthetic process	GO:0019483	2	21031	1	1	-1	-1	1	1	90	1	1	1	97	1	1	1	-1	-1
GO:BP	histidine catabolic process to glutamate and formamide	GO:0019556	4	21031	1	1	-1	-1	1	1	-1	-1	1	1	97	1	1	1	-1	-1
GO:BP	hexose metabolic process	GO:0019318	229	21031	1	1	96	2	1	1	90	1	1	1	97	1	1	1	93	3
GO:BP	histidine catabolic process to glutamate and formate	GO:0019557	4	21031	1	1	-1	-1	1	1	-1	-1	1	1	97	1	1	1	-1	-1
GO:BP	NAD metabolic process	GO:0019674	64	21031	1	1	-1	-1	1	1	-1	-1	1	1	97	1	1	1	93	1
GO:BP	glyceraldehyde-3-phosphate metabolic process	GO:0019682	12	21031	1	1	96	1	1	1	-1	-1	1	1	97	1	1	1	-1	-1
GO:BP	deoxyribose phosphate metabolic process	GO:0019692	42	21031	1	1	-1	-1	1	1	90	1	1	1	97	1	1	1	93	1
GO:BP	ribose phosphate metabolic process	GO:0019693	485	21031	1	1	96	7	1	1	90	6	1	1	97	3	1	1	93	4
GO:BP	calcium-mediated signaling	GO:0019722	223	21031	1	1	-1	-1	1	1	90	5	1	1	97	3	1	1	-1	-1
GO:BP	cellular homeostasis	GO:0019725	831	21031	1	1	96	6	1	1	90	10	1	1	97	9	1	1	93	7
GO:BP	secondary metabolic process	GO:0019748	56	21031	1	1	96	1	1	1	-1	-1	1	1	97	2	1	1	93	1
GO:BP	carboxylic acid metabolic process	GO:0019752	899	21031	1	1	96	9	1	1	90	7	1	1	97	8	1	1	93	5
GO:BP	stem cell population maintenance	GO:0019827	181	21031	1	1	96	4	1	1	90	1	1	1	97	2	1	1	93	2
GO:BP	thymine metabolic process	GO:0019859	3	21031	1	1	-1	-1	1	1	-1	-1	1	1	97	1	1	1	-1	-1
GO:BP	catechol-containing compound catabolic process	GO:0019614	10	21031	1	1	-1	-1	1	1	-1	-1	1	1	97	1	1	1	-1	-1
GO:BP	sensory perception of pain	GO:0019233	82	21031	1	1	-1	-1	1	1	90	3	1	1	97	1	1	1	-1	-1
GO:BP	regulation of vasoconstriction	GO:0019229	68	21031	1	1	96	1	1	1	90	2	1	1	97	2	1	1	-1	-1
GO:BP	neuronal action potential propagation	GO:0019227	9	21031	1	1	-1	-1	1	1	-1	-1	1	1	97	2	1	1	-1	-1
GO:BP	mRNA modification	GO:0016556	34	21031	1	1	-1	-1	1	1	-1	-1	1	1	97	1	1	1	-1	-1
GO:BP	protein ubiquitination	GO:0016567	774	21031	1	1	96	7	1	1	90	3	1	1	97	6	1	1	93	6
GO:BP	regulation of transforming growth factor beta receptor signaling pathway	GO:0017015	141	21031	1	1	96	3	1	1	-1	-1	1	1	97	2	1	1	-1	-1
GO:BP	stem cell division	GO:0017145	34	21031	1	1	-1	-1	1	1	-1	-1	1	1	97	1	1	1	-1	-1
GO:BP	negative regulation of translation	GO:0017148	128	21031	1	1	96	1	1	1	-1	-1	1	1	97	1	1	1	-1	-1
GO:BP	regulation of exocytosis	GO:0017157	190	21031	1	1	-1	-1	1	1	90	3	1	1	97	1	1	1	93	1
GO:BP	peptidyl-serine phosphorylation	GO:0018105	210	21031	1	1	96	3	1	1	90	1	1	1	97	2	1	1	-1	-1
GO:BP	peptidyl-threonine phosphorylation	GO:0018107	83	21031	1	1	96	2	1	1	90	2	1	1	97	1	1	1	-1	-1
GO:BP	peptidyl-tyrosine phosphorylation	GO:0018108	258	21031	1	1	96	5	1	1	90	1	1	1	97	6	1	1	93	1
[truncated: 21,984 more rows]
